# Supplementary material
Source: PubMed Central journal article supplement (PMC4014281)
Supplement: supp_M113.034728_mcp.M113.034728-2.pdf [file supp_M113.034728_mcp.M113.034728-2.pdf]

| Table S1: List of peptide identifications in <i>Clostridium difficile</i> exoproteome after SDS-PAGE, tryptic digestion, LC-MS/MS and database search (Mascot) |       |        |   |               |                                                                                        |                     |
|----------------------------------------------------------------------------------------------------------------------------------------------------------------|-------|--------|---|---------------|----------------------------------------------------------------------------------------|---------------------|
| Sequence                                                                                                                                                       | Score | m/z    | z | Modification  | Protein_Name                                                                           | Protein_ID          |
| FFNEEEM*NAILTR                                                                                                                                                 | 44    | 815.4  | 2 | Oxidation (M) | Aspartyl-tRNA synthetase OS=Clostridium difficile (strain 63022)                       | Q183H4 Q183H4_CLOD6 |
| VGQEGVTSPIAK                                                                                                                                                   | 45    | 593.3  | 2 |               | Aspartyl-tRNA synthetase OS=Clostridium difficile (strain 63022)                       | Q183H4 Q183H4_CLOD6 |
| QISSLEEHAKE                                                                                                                                                    | 30    | 571.3  | 2 |               | Aspartyl-tRNA synthetase OS=Clostridium difficile (strain 63022)                       | Q183H4 Q183H4_CLOD6 |
| SGTTTEPALAFR                                                                                                                                                   | 43    | 625.8  | 2 |               | Glucose-6-phosphate isomerase OS=Clostridium difficile (strain 63022)                  | Q180C9 G6PI_CLOD6   |
| NITISSEEVLDLGLNYLAGK                                                                                                                                           | 69    | 1076.0 | 2 |               | Glucose-6-phosphate isomerase OS=Clostridium difficile (strain 63022)                  | Q180C9 G6PI_CLOD6   |
| IYATTDASKGALR                                                                                                                                                  | 48    | 683.9  | 2 |               | Glucose-6-phosphate isomerase OS=Clostridium difficile (strain 63022)                  | Q180C9 G6PI_CLOD6   |
| SGNFGQVINK                                                                                                                                                     | 44    | 532.2  | 2 |               | Putative flagellar hook-length control protein OS=Clostridium difficile (strain 63022) | Q18CZ6 Q18CZ6_CLOD6 |
| ANINSSNDIENLDIVK                                                                                                                                               | 75    | 879.9  | 2 |               | Putative flagellar hook-length control protein OS=Clostridium difficile (strain 63022) | Q18CZ6 Q18CZ6_CLOD6 |
| IANQNSLNKANINSSNDIENLDIVK                                                                                                                                      | 49    | 957.7  | 3 |               | Putative flagellar hook-length control protein OS=Clostridium difficile (strain 63022) | Q18CZ6 Q18CZ6_CLOD6 |
| TNDIQELTIK                                                                                                                                                     | 52    | 587.8  | 2 |               | Putative flagellar hook-length control protein OS=Clostridium difficile (strain 63022) | Q18CZ6 Q18CZ6_CLOD6 |
| QIESNVMDDSIK                                                                                                                                                   | 72    | 689.8  | 2 |               | Putative flagellar hook-length control protein OS=Clostridium difficile (strain 63022) | Q18CZ6 Q18CZ6_CLOD6 |
| ELLEDNANKDIEVITK                                                                                                                                               | 52    | 922.5  | 2 |               | Putative flagellar hook-length control protein OS=Clostridium difficile (strain 63022) | Q18CZ6 Q18CZ6_CLOD6 |
| QIESNM*DDSIK                                                                                                                                                   | 65    | 697.8  | 2 | Oxidation (M) | Putative flagellar hook-length control protein OS=Clostridium difficile (strain 63022) | Q18CZ6 Q18CZ6_CLOD6 |
| SGNFGQVINKNVDMNK                                                                                                                                               | 50    | 588.9  | 3 |               | Putative flagellar hook-length control protein OS=Clostridium difficile (strain 63022) | Q18CZ6 Q18CZ6_CLOD6 |
| ANINSSNDIENLDIVKLR                                                                                                                                             | 35    | 676.7  | 3 |               | Putative flagellar hook-length control protein OS=Clostridium difficile (strain 63022) | Q18CZ6 Q18CZ6_CLOD6 |
| WGATGPNSFDCSGFTSYVYK                                                                                                                                           | 68    | 1122.3 | 2 |               | Putative cell-wall hydrolase OS=Clostridium difficile (strain 63022)                   | Q183K6 Q183K6_CLOD6 |
| NGAGVNLPR                                                                                                                                                      | 54    | 449.2  | 2 |               | Putative cell-wall hydrolase OS=Clostridium difficile (strain 63022)                   | Q183K6 Q183K6_CLOD6 |
| IKSVDNVTGWVNGDYLTIQGGNVDK                                                                                                                                      | 32    | 922.0  | 3 |               | Putative cell-wall hydrolase OS=Clostridium difficile (strain 63022)                   | Q183K6 Q183K6_CLOD6 |
| RLITATR                                                                                                                                                        | 32    | 415.7  | 2 |               | Putative cell-wall hydrolase OS=Clostridium difficile (strain 63022)                   | Q183K6 Q183K6_CLOD6 |
| SVDNVTGWVNGDYLTIQGGNVDK                                                                                                                                        | 61    | 841.6  | 3 |               | Putative cell-wall hydrolase OS=Clostridium difficile (strain 63022)                   | Q183K6 Q183K6_CLOD6 |
| AELKPGDLVFFGSGGSINHVGLYVGDSK                                                                                                                                   | 32    | 955.4  | 3 |               | Putative cell-wall hydrolase OS=Clostridium difficile (strain 63022)                   | Q183K6 Q183K6_CLOD6 |
| VQNVLNLAFAK                                                                                                                                                    | 54    | 573.3  | 2 |               | Putative cell-wall hydrolase OS=Clostridium difficile (strain 63022)                   | Q183K6 Q183K6_CLOD6 |
| VTSMAPGTNYAR                                                                                                                                                   | 34    | 634.2  | 2 |               | Putative cell-wall hydrolase OS=Clostridium difficile (strain 63022)                   | Q183K6 Q183K6_CLOD6 |
| INTGDKVEVLELHNSNGWIK                                                                                                                                           | 44    | 718.3  | 3 |               | Putative cell-wall hydrolase OS=Clostridium difficile (strain 63022)                   | Q183K6 Q183K6_CLOD6 |
| FIHSPQTGDVVK                                                                                                                                                   | 47    | 664.2  | 2 |               | Putative cell-wall hydrolase OS=Clostridium difficile (strain 63022)                   | Q183K6 Q183K6_CLOD6 |
| VTSM*APGTNYAR                                                                                                                                                  | 59    | 642.2  | 2 | Oxidation (M) | Putative cell-wall hydrolase OS=Clostridium difficile (strain 63022)                   | Q183K6 Q183K6_CLOD6 |
| GVLKVQDEVELVGLTEAPR                                                                                                                                            | 36    | 684.7  | 3 |               | Elongation factor Tu OS=Clostridium difficile (strain 63022)                           | Q18CE4 EFTU_CLOD6   |
| DLLTEYDFPGDDTPIVR                                                                                                                                              | 91    | 983.3  | 2 |               | Elongation factor Tu OS=Clostridium difficile (strain 63022)                           | Q18CE4 EFTU_CLOD6   |
| LLDQAQAGDNIGALLR                                                                                                                                               | 80    | 834.4  | 2 |               | Elongation factor Tu OS=Clostridium difficile (strain 63022)                           | Q18CE4 EFTU_CLOD6   |
| GITISTAHVEYETPNR                                                                                                                                               | 71    | 894.3  | 2 |               | Elongation factor Tu OS=Clostridium difficile (strain 63022)                           | Q18CE4 EFTU_CLOD6   |
| TVASGVVATIIIE                                                                                                                                                  | 30    | 580.3  | 2 |               | Elongation factor Tu OS=Clostridium difficile (strain 63022)                           | Q18CE4 EFTU_CLOD6   |
| FNLAGDITFR                                                                                                                                                     | 37    | 571.2  | 2 |               | Proline reductase OS=Clostridium difficile (strain 63022)                              | Q17ZY6 Q17ZY6_CLOD6 |
| DTLEQLVAIPSAGK                                                                                                                                                 | 46    | 721.8  | 2 |               | Proline reductase OS=Clostridium difficile (strain 63022)                              | Q17ZY6 Q17ZY6_CLOD6 |

| Sequence                         | Score | m/z    | z | Modification  | Protein_Name                                           | Protein_ID          |
|----------------------------------|-------|--------|---|---------------|--------------------------------------------------------|---------------------|
| AIEEAGIPTIIIAALPPVVR             | 55    | 1022.5 | 2 |               | Proline reductase OS=Clostridium difficile (strain 63) | Q17ZY6 Q17ZY6_CLOD6 |
| VFIDEGDVLCESPSYIGAINAFK          | 73    | 886.8  | 3 |               | Putative amino acid aminotransferase OS=Clostridium    | Q181R8 Q181R8_CLOD6 |
| TNVNKDDILVTSQSQQGLDFAGK          | 40    | 803.4  | 3 |               | Putative amino acid aminotransferase OS=Clostridium    | Q181R8 Q181R8_CLOD6 |
| VSVAVLEENGR                      | 43    | 586.8  | 2 |               | Putative amino acid aminotransferase OS=Clostridium    | Q181R8 Q181R8_CLOD6 |
| MYQLEYAGLSK                      | 52    | 651.7  | 2 |               | Cell surface protein (Putative cell surface-associated | Q183M1 Q183M1_CLOD6 |
| VYLIGGENSLSK                     | 50    | 640.2  | 2 |               | Cell surface protein (Putative cell surface-associated | Q183M1 Q183M1_CLOD6 |
| GAIVVVIDNTANPNREK                | 39    | 905.5  | 2 |               | Cell surface protein (Putative cell surface-associated | Q183M1 Q183M1_CLOD6 |
| NVQTQLSNM*GISVER                 | 83    | 846.3  | 2 | Oxidation (M) | Cell surface protein (Putative cell surface-associated | Q183M1 Q183M1_CLOD6 |
| SELQGADEFLNSSK                   | 52    | 762.8  | 2 |               | Cell surface protein (Putative cell surface-associated | Q183M1 Q183M1_CLOD6 |
| TDSPVVLVGNKLDESQK                | 42    | 610.3  | 3 |               | Cell surface protein (Putative cell surface-associated | Q183M1 Q183M1_CLOD6 |
| SSVAYNPM*DLGLTTPAK               | 75    | 891.0  | 2 | Oxidation (M) | Cell surface protein (Putative cell surface-associated | Q183M1 Q183M1_CLOD6 |
| TSSGQATSGESLTGADRYETAVK          | 63    | 772.7  | 3 |               | Cell surface protein (Putative cell surface-associated | Q183M1 Q183M1_CLOD6 |
| SEAQGATKPSNM*DTAPTQFNVTDVVR      | 39    | 927.4  | 3 | Oxidation (M) | Cell surface protein (Putative cell surface-associated | Q183M1 Q183M1_CLOD6 |
| VTAANVDFFSR                      | 57    | 613.8  | 2 |               | Cell surface protein (Putative cell surface-associated | Q183M1 Q183M1_CLOD6 |
| TDSPVVLVGNK                      | 57    | 564.8  | 2 |               | Cell surface protein (Putative cell surface-associated | Q183M1 Q183M1_CLOD6 |
| SQGLDIDGLAVGALGAK                | 92    | 792.8  | 2 |               | Cell surface protein (Putative cell surface-associated | Q183M1 Q183M1_CLOD6 |
| DTADWLETTDTSLDQLGNLLADIKK        | 30    | 926.0  | 3 |               | Flagellar hook-associated protein OS=Clostridium di    | Q18CX5 Q18CX5_CLOD6 |
| KLANPSDANIK                      | 35    | 585.7  | 2 |               | Flagellar hook-associated protein OS=Clostridium di    | Q18CX5 Q18CX5_CLOD6 |
| EINKLSDNPYK                      | 52    | 660.7  | 2 |               | Flagellar hook-associated protein OS=Clostridium di    | Q18CX5 Q18CX5_CLOD6 |
| EIANALNATHEGK                    | 76    | 684.2  | 2 |               | Flagellar hook-associated protein OS=Clostridium di    | Q18CX5 Q18CX5_CLOD6 |
| EKNDEGLIQLK                      | 41    | 643.8  | 2 |               | Flagellar hook-associated protein OS=Clostridium di    | Q18CX5 Q18CX5_CLOD6 |
| LFNVSILDYI                       | 56    | 598.7  | 2 |               | Flagellar hook-associated protein OS=Clostridium di    | Q18CX5 Q18CX5_CLOD6 |
| AAELTYQASLQTGGK                  | 95    | 769.8  | 2 |               | Flagellar hook-associated protein OS=Clostridium di    | Q18CX5 Q18CX5_CLOD6 |
| LSDNPYKAIK                       | 39    | 574.7  | 2 |               | Flagellar hook-associated protein OS=Clostridium di    | Q18CX5 Q18CX5_CLOD6 |
| LANPSDANIK                       | 51    | 521.7  | 2 |               | Flagellar hook-associated protein OS=Clostridium di    | Q18CX5 Q18CX5_CLOD6 |
| DVLSQNDEIDYGEKLVQLK              | 63    | 736.3  | 3 |               | Flagellar hook-associated protein OS=Clostridium di    | Q18CX5 Q18CX5_CLOD6 |
| VSTGMMSSSYLNSLQDNLQR             | 66    | 1116.3 | 2 |               | Flagellar hook-associated protein OS=Clostridium di    | Q18CX5 Q18CX5_CLOD6 |
| DVLSQNDEIDYGEK                   | 69    | 812.7  | 2 |               | Flagellar hook-associated protein OS=Clostridium di    | Q18CX5 Q18CX5_CLOD6 |
| GLVSSGNGSYSDDDEIK                | 94    | 814.3  | 2 |               | Flagellar hook-associated protein OS=Clostridium di    | Q18CX5 Q18CX5_CLOD6 |
| ILNSKSEIK                        | 34    | 516.2  | 2 |               | Flagellar hook-associated protein OS=Clostridium di    | Q18CX5 Q18CX5_CLOD6 |
| NDEGLIQLK                        | 38    | 515.2  | 2 |               | Flagellar hook-associated protein OS=Clostridium di    | Q18CX5 Q18CX5_CLOD6 |
| M*KEIANALNATHEGK                 | 87    | 821.8  | 2 | Oxidation (M) | Flagellar hook-associated protein OS=Clostridium di    | Q18CX5 Q18CX5_CLOD6 |
| ELTTTCLGDMENLIDNTVNVR            | 34    | 803.6  | 3 |               | Flagellar hook-associated protein OS=Clostridium di    | Q18CX5 Q18CX5_CLOD6 |
| LANPSDANIKELTTTCLGDM*ENLIDNTVNVR | 63    | 1150.1 | 3 | Oxidation (M) | Flagellar hook-associated protein OS=Clostridium di    | Q18CX5 Q18CX5_CLOD6 |
| MKEIANALNATHEGK                  | 106   | 814.3  | 2 |               | Flagellar hook-associated protein OS=Clostridium di    | Q18CX5 Q18CX5_CLOD6 |
| LANPSDANIKELTTTCLGDMENLIDNTVNVR  | 49    | 1144.7 | 3 |               | Flagellar hook-associated protein OS=Clostridium di    | Q18CX5 Q18CX5_CLOD6 |
| LSSLGFDPTKTDPF EK                | 34    | 594.5  | 3 |               | Flagellar hook-associated protein OS=Clostridium di    | Q18CX5 Q18CX5_CLOD6 |

| Sequence                       | Score | m/z    | z | Modification    | Protein_Name                                             | Protein_ID          |
|--------------------------------|-------|--------|---|-----------------|----------------------------------------------------------|---------------------|
| LSSLGFDPK                      | 43    | 532.7  | 2 |                 | Flagellar hook-associated protein OS=Clostridium di      | Q18CX5 Q18CX5_CLOD6 |
| FNTSLNLNK                      | 60    | 525.7  | 2 |                 | Flagellar hook-associated protein OS=Clostridium di      | Q18CX5 Q18CX5_CLOD6 |
| GLVSSGNGSYSDEIKTISNSTNEK       | 89    | 867.9  | 3 |                 | Flagellar hook-associated protein OS=Clostridium di      | Q18CX5 Q18CX5_CLOD6 |
| APNTAM*LDYLTVGVLPK             | 58    | 909.8  | 2 | Oxidation (M)   | Oligopeptide ABC transporter, substrate-binding lipo     | Q18A51 Q18A51_CLOD6 |
| SGELDLAQITPK                   | 60    | 636.4  | 2 |                 | Oligopeptide ABC transporter, substrate-binding lipo     | Q18A51 Q18A51_CLOD6 |
| TM*TDPIADMLTR                  | 59    | 690.7  | 2 | Oxidation (M)   | 30S ribosomal protein S8 OS=Clostridium difficile (s     | Q18CH0 RS8_CLOD6    |
| ILLEGFIR                       | 50    | 545.2  | 2 |                 | 30S ribosomal protein S8 OS=Clostridium difficile (s     | Q18CH0 RS8_CLOD6    |
| VLNGLGISVISTSK                 | 62    | 694.3  | 2 |                 | 30S ribosomal protein S8 OS=Clostridium difficile (s     | Q18CH0 RS8_CLOD6    |
| TMTDPIADMLTR                   | 55    | 682.7  | 2 |                 | 30S ribosomal protein S8 OS=Clostridium difficile (s     | Q18CH0 RS8_CLOD6    |
| TM*TDPIADM*LTR                 | 55    | 699.2  | 2 | 2 Oxidation (M) | 30S ribosomal protein S8 OS=Clostridium difficile (s     | Q18CH0 RS8_CLOD6    |
| KENVGGEVICYVW                  | 39    | 776.7  | 2 |                 | 30S ribosomal protein S8 OS=Clostridium difficile (s     | Q18CH0 RS8_CLOD6    |
| LVEVISGQLTSK                   | 49    | 637.2  | 2 |                 | 3-hydroxybutyryl-CoA dehydrogenase OS=Clostridiu         | Q18AQ7 Q18AQ7_CLOD6 |
| VTFDVFELSK                     | 80    | 643.2  | 2 |                 | 3-hydroxybutyryl-CoA dehydrogenase OS=Clostridiu         | Q18AQ7 Q18AQ7_CLOD6 |
| SINKVPVDVSESPGFVVNR            | 32    | 681.9  | 3 |                 | 3-hydroxybutyryl-CoA dehydrogenase OS=Clostridiu         | Q18AQ7 Q18AQ7_CLOD6 |
| ILIPM*INEAVGIYADGVASKEEIDEAM*K | 38    | 1018.1 | 3 | 2 Oxidation (M) | 3-hydroxybutyryl-CoA dehydrogenase OS=Clostridiu         | Q18AQ7 Q18AQ7_CLOD6 |
| FNVIASEAVLEGTIR                | 53    | 809.9  | 2 |                 | Putative peptidase OS=Clostridium difficile (strain 63   | Q18AU1 Q18AU1_CLOD6 |
| LFFQPGEEVGKGAR                 | 31    | 768.4  | 2 |                 | Putative peptidase OS=Clostridium difficile (strain 63   | Q18AU1 Q18AU1_CLOD6 |
| M*ASADFFK                      | 34    | 466.6  | 2 | Oxidation (M)   | Putative peptidase OS=Clostridium difficile (strain 63   | Q18AU1 Q18AU1_CLOD6 |
| EVSPLEPLVSVGVLNSGTR            | 38    | 685.0  | 3 |                 | Putative peptidase OS=Clostridium difficile (strain 63   | Q18AU1 Q18AU1_CLOD6 |
| NITSVGEINEK                    | 57    | 602.3  | 2 |                 | Cell surface protein OS=Clostridium difficile (strain 63 | Q183N0 Q183N0_CLOD6 |
| NSPMVLVNDGSDKTVLEGAK           | 34    | 692.0  | 3 |                 | Cell surface protein OS=Clostridium difficile (strain 63 | Q183N0 Q183N0_CLOD6 |
| SLADGLSVSGLSGATK               | 38    | 731.8  | 2 |                 | Cell surface protein OS=Clostridium difficile (strain 63 | Q183N0 Q183N0_CLOD6 |
| NSPM*VLVNDGSDKTVLEGAK          | 34    | 697.7  | 3 | Oxidation (M)   | Cell surface protein OS=Clostridium difficile (strain 63 | Q183N0 Q183N0_CLOD6 |
| VIQQCINASK                     | 59    | 580.8  | 2 |                 | Cell surface protein OS=Clostridium difficile (strain 63 | Q183N0 Q183N0_CLOD6 |
| NVQTTQDAKDLAK                  | 55    | 716.3  | 2 |                 | Cell surface protein OS=Clostridium difficile (strain 63 | Q183N0 Q183N0_CLOD6 |
| VLPiEVDGFI DTNR                | 54    | 794.3  | 2 |                 | Cell surface protein OS=Clostridium difficile (strain 63 | Q183N0 Q183N0_CLOD6 |
| GLAEDVKSGDSILIDDGLVGLR         | 59    | 748.1  | 3 |                 | Pyruvate kinase OS=Clostridium difficile (strain 630)    | Q180P2 Q180P2_CLOD6 |
| SSVAGNTDEVIEKAIEAAR            | 116   | 980.8  | 2 |                 | Pyruvate kinase OS=Clostridium difficile (strain 630)    | Q180P2 Q180P2_CLOD6 |
| SPIIATTNNEKTM*NK               | 33    | 839.4  | 2 | Oxidation (M)   | Pyruvate kinase OS=Clostridium difficile (strain 630)    | Q180P2 Q180P2_CLOD6 |
| SGDSILIDDGLVGLR                | 67    | 765.3  | 2 |                 | Pyruvate kinase OS=Clostridium difficile (strain 630)    | Q180P2 Q180P2_CLOD6 |
| VHVISEIVQGIGVGTQTVEGK          | 44    | 760.7  | 3 |                 | Pyruvate kinase OS=Clostridium difficile (strain 630)    | Q180P2 Q180P2_CLOD6 |
| LNKPVAILLDTKGPEIR              | 68    | 939.0  | 2 |                 | Pyruvate kinase OS=Clostridium difficile (strain 630)    | Q180P2 Q180P2_CLOD6 |
| SSVAGNTDEVIEK                  | 74    | 674.8  | 2 |                 | Pyruvate kinase OS=Clostridium difficile (strain 630)    | Q180P2 Q180P2_CLOD6 |
| RTEETLDYDR                     | 48    | 649.3  | 2 |                 | Pyruvate kinase OS=Clostridium difficile (strain 630)    | Q180P2 Q180P2_CLOD6 |

| Sequence                       | Score | m/z    | z | Modification    | Protein_Name                                                          | Protein_ID          |
|--------------------------------|-------|--------|---|-----------------|-----------------------------------------------------------------------|---------------------|
| SPIIATNNEK                     | 54    | 594.3  | 2 |                 | Pyruvate kinase OS=Clostridium difficile (strain 630)                 | Q180P2 Q180P2_CLOD6 |
| INLPAITPK                      | 46    | 483.8  | 2 |                 | Pyruvate kinase OS=Clostridium difficile (strain 630)                 | Q180P2 Q180P2_CLOD6 |
| YVAPAIGQLTFDATDK               | 103   | 855.3  | 2 |                 | Cell surface protein (Putative hemagglutinin/adhesin)                 | Q188W0 Q188W0_CLOD6 |
| MASGDKTVDPSSDDTYVLTLLTK        | 60    | 753.4  | 3 |                 | Cell surface protein (Putative hemagglutinin/adhesin)                 | Q188W0 Q188W0_CLOD6 |
| M*ASGDKTVDPSSDDTYVLTLLTK       | 66    | 758.3  | 3 | Oxidation (M)   | Cell surface protein (Putative hemagglutinin/adhesin)                 | Q188W0 Q188W0_CLOD6 |
| AGAVSETTATDSAANATFEVKK         | 62    | 723.7  | 3 |                 | Cell surface protein (Putative hemagglutinin/adhesin)                 | Q188W0 Q188W0_CLOD6 |
| TVDPSSDDTYVLTLLTK              | 75    | 834.3  | 2 |                 | Cell surface protein (Putative hemagglutinin/adhesin)                 | Q188W0 Q188W0_CLOD6 |
| AGAVSETTATDSAANATFEVK          | 116   | 1020.8 | 2 |                 | Cell surface protein (Putative hemagglutinin/adhesin)                 | Q188W0 Q188W0_CLOD6 |
| VAGLPSGLDYTAVGNR               | 62    | 795.3  | 2 |                 | Cell surface protein (Putative hemagglutinin/adhesin)                 | Q188W0 Q188W0_CLOD6 |
| TASQAVQTDLDNVSVLVK             | 92    | 944.4  | 2 |                 | Cell surface protein (Putative hemagglutinin/adhesin)                 | Q188W0 Q188W0_CLOD6 |
| YVAPAIGQLTFDATDKQIK            | 36    | 693.9  | 3 |                 | Cell surface protein (Putative hemagglutinin/adhesin)                 | Q188W0 Q188W0_CLOD6 |
| YVAAPAVGQLTFDATDK              | 64    | 884.3  | 2 |                 | Cell surface protein (Putative hemagglutinin/adhesin)                 | Q188W0 Q188W0_CLOD6 |
| EYLEENLDYLR                    | 43    | 728.8  | 2 |                 | Proline racemase OS=Clostridium difficile (strain 630)                | Q17ZY4 PRAC_CLOD6   |
| TVDLVEIYDEPTHPEATYK            | 72    | 740.7  | 3 |                 | Proline racemase OS=Clostridium difficile (strain 630)                | Q17ZY4 PRAC_CLOD6   |
| TAIM*LEPR                      | 31    | 473.8  | 2 | Oxidation (M)   | Proline racemase OS=Clostridium difficile (strain 630)                | Q17ZY4 PRAC_CLOD6   |
| NVIFGQQGVDR                    | 69    | 666.3  | 2 |                 | Proline racemase OS=Clostridium difficile (strain 630)                | Q17ZY4 PRAC_CLOD6   |
| SIQAIDSHTAGEATR                | 82    | 778.8  | 2 |                 | Proline racemase OS=Clostridium difficile (strain 630)                | Q17ZY4 PRAC_CLOD6   |
| VADFNNAVVPK                    | 52    | 530.3  | 2 |                 | Proline racemase OS=Clostridium difficile (strain 630)                | Q17ZY4 PRAC_CLOD6   |
| EVSFLNVPFLYK                   | 43    | 763.9  | 2 |                 | Proline racemase OS=Clostridium difficile (strain 630)                | Q17ZY4 PRAC_CLOD6   |
| NQNDAFLFDKWK                   | 37    | 546.9  | 3 |                 | Putative membrane protein OS=Clostridium difficile                    | Q185R5 Q185R5_CLOD6 |
| M*QQSPQDIISM*FEK               | 54    | 905.8  | 2 | 2 Oxidation (M) | Putative membrane protein OS=Clostridium difficile                    | Q185R5 Q185R5_CLOD6 |
| IQYDDTPYHWPSNVISLTNSSEK        | 55    | 899.3  | 3 |                 | Putative membrane protein OS=Clostridium difficile                    | Q185R5 Q185R5_CLOD6 |
| QVTFNDGSVWK                    | 59    | 640.7  | 2 |                 | Putative membrane protein OS=Clostridium difficile                    | Q185R5 Q185R5_CLOD6 |
| EVSNSVLENYK                    | 54    | 722.7  | 2 |                 | Putative membrane protein OS=Clostridium difficile                    | Q185R5 Q185R5_CLOD6 |
| SFQGKEVSNVLENYK                | 50    | 996.3  | 2 |                 | Putative membrane protein OS=Clostridium difficile                    | Q185R5 Q185R5_CLOD6 |
| AFLGLLNR                       | 31    | 452.2  | 2 |                 | Putative rubrerythrin OS=Clostridium difficile (strain 630)           | Q18C45 Q18C45_CLOD6 |
| IGVAQGVDAEIIIEGLR              | 94    | 820.3  | 2 |                 | Putative rubrerythrin OS=Clostridium difficile (strain 630)           | Q18C45 Q18C45_CLOD6 |
| FAELLGEEVVVADTKENLR            | 75    | 668.3  | 3 |                 | Putative rubrerythrin OS=Clostridium difficile (strain 630)           | Q18C45 Q18C45_CLOD6 |
| IGVAALALGIAQGALDEAVK           | 65    | 627.3  | 3 |                 | Acyl-CoA dehydrogenase, short-chain specific OS=Clostridium difficile | Q188I5 Q188I5_CLOD6 |
| IAM*GTLEVGR                    | 47    | 531.8  | 2 | Oxidation (M)   | Acyl-CoA dehydrogenase, short-chain specific OS=Clostridium difficile | Q188I5 Q188I5_CLOD6 |
| GLVYDAAQKR                     | 53    | 560.9  | 2 |                 | Acyl-CoA dehydrogenase, short-chain specific OS=Clostridium difficile | Q188I5 Q188I5_CLOD6 |
| FISSNIPEEYGGGGAGYVSYAIVMEEIARR | 45    | 1079.0 | 3 |                 | Acyl-CoA dehydrogenase, short-chain specific OS=Clostridium difficile | Q188I5 Q188I5_CLOD6 |
| SITVASSM*GPGVK                 | 64    | 625.2  | 2 | Oxidation (M)   | 50S ribosomal protein L1 OS=Clostridium difficile (strain 630)        | Q18CE9 RL1_CLOD6    |
| AKEAEQAGADDFVGAELVQK           | 43    | 697.6  | 3 |                 | 50S ribosomal protein L1 OS=Clostridium difficile (strain 630)        | Q18CE9 RL1_CLOD6    |

| Sequence                   | Score | m/z    | z | Modification  | Protein_Name                                                                                   | Protein_ID          |
|----------------------------|-------|--------|---|---------------|------------------------------------------------------------------------------------------------|---------------------|
| GALACQGINYEK               | 60    | 662.2  | 2 |               | ABC transporter, substrate-binding lipoprotein OS=Clostridium difficile (strain 6)             | Q18A65 Q18A65_CLOD6 |
| DIPILITAVSDPVAAGLVK        | 82    | 946.4  | 2 |               | ABC transporter, substrate-binding lipoprotein OS=Clostridium difficile (strain 6)             | Q18A65 Q18A65_CLOD6 |
| VQVDALKEYASK               | 65    | 675.8  | 2 |               | ABC transporter, substrate-binding lipoprotein OS=Clostridium difficile (strain 6)             | Q18A65 Q18A65_CLOD6 |
| KIGITQLVEHPALDATR          | 60    | 621.4  | 3 |               | ABC transporter, substrate-binding lipoprotein OS=Clostridium difficile (strain 6)             | Q18A65 Q18A65_CLOD6 |
| TLEKPGTNVSGTSDFFVSDKGLELLK | 32    | 912.4  | 3 |               | ABC transporter, substrate-binding lipoprotein OS=Clostridium difficile (strain 6)             | Q18A65 Q18A65_CLOD6 |
| TIGVM*YNTSEVNSK            | 70    | 779.8  | 2 | Oxidation (M) | ABC transporter, substrate-binding lipoprotein OS=Clostridium difficile (strain 6)             | Q18A65 Q18A65_CLOD6 |
| GITTSNEVNQGISSLVGK         | 68    | 902.4  | 2 |               | ABC transporter, substrate-binding lipoprotein OS=Clostridium difficile (strain 6)             | Q18A65 Q18A65_CLOD6 |
| IATENKIPVIAAESGPVEK        | 52    | 655.9  | 3 |               | ABC transporter, substrate-binding lipoprotein OS=Clostridium difficile (strain 6)             | Q18A65 Q18A65_CLOD6 |
| TIGVMYNTSEVNSK             | 83    | 771.8  | 2 |               | ABC transporter, substrate-binding lipoprotein OS=Clostridium difficile (strain 6)             | Q18A65 Q18A65_CLOD6 |
| ALGM*EKPSNENISYVK          | 45    | 599.2  | 3 | Oxidation (M) | ABC transporter, substrate-binding lipoprotein OS=Clostridium difficile (strain 6)             | Q18A65 Q18A65_CLOD6 |
| IGITQLVEHPALDATR           | 53    | 867.5  | 2 |               | ABC transporter, substrate-binding lipoprotein OS=Clostridium difficile (strain 6)             | Q18A65 Q18A65_CLOD6 |
|                            |       |        |   |               |                                                                                                |                     |
| VTAIGISDK                  | 34    | 452.1  | 2 |               | Cell surface protein OS=Clostridium difficile (strain 6)                                       | Q18A40 Q18A40_CLOD6 |
| IGGVDRYQTNK                | 35    | 417.4  | 3 |               | Cell surface protein OS=Clostridium difficile (strain 6)                                       | Q18A40 Q18A40_CLOD6 |
| IAGEIEKIK                  | 36    | 334.5  | 3 |               | Cell surface protein OS=Clostridium difficile (strain 6)                                       | Q18A40 Q18A40_CLOD6 |
| IYVIGGENSISKDVEK           | 49    | 875.8  | 2 |               | Cell surface protein OS=Clostridium difficile (strain 6)                                       | Q18A40 Q18A40_CLOD6 |
| IYVIGGENSISK               | 44    | 640.2  | 2 |               | Cell surface protein OS=Clostridium difficile (strain 6)                                       | Q18A40 Q18A40_CLOD6 |
| NAPVVLVSNKSDK              | 53    | 685.8  | 2 |               | Cell surface protein OS=Clostridium difficile (strain 6)                                       | Q18A40 Q18A40_CLOD6 |
| NAPVVLVSNK                 | 42    | 520.7  | 2 |               | Cell surface protein OS=Clostridium difficile (strain 6)                                       | Q18A40 Q18A40_CLOD6 |
| EFYITSGDDLVLVYALVASPLAK    | 79    | 1136.5 | 2 |               | Cell surface protein OS=Clostridium difficile (strain 6)                                       | Q18A40 Q18A40_CLOD6 |
|                            |       |        |   |               |                                                                                                |                     |
| LKGVSEPEAK                 | 37    | 529.3  | 2 |               | GMP synthase [glutamine-hydrolyzing] OS=Clostridium difficile (strain 6)                       | Q18CT8 GUAA_CLOD6   |
| VNAEDRFLSK                 | 44    | 589.8  | 2 |               | GMP synthase [glutamine-hydrolyzing] OS=Clostridium difficile (strain 6)                       | Q18CT8 GUAA_CLOD6   |
| IIGEEFIR                   | 45    | 488.8  | 2 |               | GMP synthase [glutamine-hydrolyzing] OS=Clostridium difficile (strain 6)                       | Q18CT8 GUAA_CLOD6   |
|                            |       |        |   |               |                                                                                                |                     |
| YLEEYPDAK                  | 51    | 564.2  | 2 |               | Putative uncharacterized protein OS=Clostridium difficile (strain 6)                           | Q183M6 Q183M6_CLOD6 |
| ALGEAALELYR                | 69    | 603.2  | 2 |               | Putative uncharacterized protein OS=Clostridium difficile (strain 6)                           | Q183M6 Q183M6_CLOD6 |
| YLEEYPDAKVK                | 34    | 677.8  | 2 |               | Putative uncharacterized protein OS=Clostridium difficile (strain 6)                           | Q183M6 Q183M6_CLOD6 |
| SHFDELATNKIQYVHAP          | 35    | 657.3  | 3 |               | Putative uncharacterized protein OS=Clostridium difficile (strain 6)                           | Q183M6 Q183M6_CLOD6 |
|                            |       |        |   |               |                                                                                                |                     |
| EKDYTLNTSLATTEYLK          | 59    | 1009.5 | 2 |               | Cell surface protein (Putative N-acetylmuramoyl-L-alanine) OS=Clostridium difficile (strain 6) | Q18AN5 Q18AN5_CLOD6 |
| TVM*IDPGHGGSDTGTGKPLGGIR   | 46    | 780.7  | 3 | Oxidation (M) | Cell surface protein (Putative N-acetylmuramoyl-L-alanine) OS=Clostridium difficile (strain 6) | Q18AN5 Q18AN5_CLOD6 |
| TLSTDPTKDYLYVLR            | 70    | 893.0  | 2 |               | Cell surface protein (Putative N-acetylmuramoyl-L-alanine) OS=Clostridium difficile (strain 6) | Q18AN5 Q18AN5_CLOD6 |
| SDVLVDALAAGPLAANLKSPILITPK | 34    | 863.5  | 3 |               | Cell surface protein (Putative N-acetylmuramoyl-L-alanine) OS=Clostridium difficile (strain 6) | Q18AN5 Q18AN5_CLOD6 |
| VM*SSIASLSSK               | 61    | 563.3  | 2 | Oxidation (M) | Cell surface protein (Putative N-acetylmuramoyl-L-alanine) OS=Clostridium difficile (strain 6) | Q18AN5 Q18AN5_CLOD6 |
| SKGFNVIM*TR                | 52    | 584.8  | 2 | Oxidation (M) | Cell surface protein (Putative N-acetylmuramoyl-L-alanine) OS=Clostridium difficile (strain 6) | Q18AN5 Q18AN5_CLOD6 |
| DVIIIIGDENAIKTTANQIK       | 71    | 1072.6 | 2 |               | Cell surface protein (Putative N-acetylmuramoyl-L-alanine) OS=Clostridium difficile (strain 6) | Q18AN5 Q18AN5_CLOD6 |
| DVIIIIGDENAIK              | 70    | 693.9  | 2 |               | Cell surface protein (Putative N-acetylmuramoyl-L-alanine) OS=Clostridium difficile (strain 6) | Q18AN5 Q18AN5_CLOD6 |
| TSAPITELTGSDRYETAVK        | 71    | 680.4  | 3 |               | Cell surface protein (Putative N-acetylmuramoyl-L-alanine) OS=Clostridium difficile (strain 6) | Q18AN5 Q18AN5_CLOD6 |
| LNPRDVIIGDENAIK            | 63    | 934.0  | 2 |               | Cell surface protein (Putative N-acetylmuramoyl-L-alanine) OS=Clostridium difficile (strain 6) | Q18AN5 Q18AN5_CLOD6 |

| Sequence                    | Score | m/z    | z | Modification    | Protein_Name                                         | Protein_ID          |
|-----------------------------|-------|--------|---|-----------------|------------------------------------------------------|---------------------|
| VMSSIASLSK                  | 49    | 555.3  | 2 |                 | Cell surface protein (Putative N-acetylmuramoyl-L-a  | Q18AN5 Q18AN5_CLOD6 |
| TTANQIKSTVNASQTR            | 56    | 860.4  | 2 |                 | Cell surface protein (Putative N-acetylmuramoyl-L-a  | Q18AN5 Q18AN5_CLOD6 |
| VYITNANGGEVDALTIAAK         | 59    | 960.5  | 2 |                 | Cell surface protein (Putative N-acetylmuramoyl-L-a  | Q18AN5 Q18AN5_CLOD6 |
| FYTDDLEAVLVAK               | 76    | 807.0  | 2 |                 | Cell surface protein (Putative N-acetylmuramoyl-L-a  | Q18AN5 Q18AN5_CLOD6 |
| TVATNILNR                   | 58    | 501.3  | 2 |                 | Cell surface protein (Putative N-acetylmuramoyl-L-a  | Q18AN5 Q18AN5_CLOD6 |
| DTDKTLSLGNR                 | 42    | 610.3  | 2 |                 | Cell surface protein (Putative N-acetylmuramoyl-L-a  | Q18AN5 Q18AN5_CLOD6 |
| SPILITPK                    | 47    | 434.8  | 2 |                 | Cell surface protein (Putative N-acetylmuramoyl-L-a  | Q18AN5 Q18AN5_CLOD6 |
| SDVLVDALAAGPLAANLK          | 75    | 579.9  | 3 |                 | Cell surface protein (Putative N-acetylmuramoyl-L-a  | Q18AN5 Q18AN5_CLOD6 |
| TVMIDPGHGGSDTGTGKPLGGIR     | 53    | 775.3  | 3 |                 | Cell surface protein (Putative N-acetylmuramoyl-L-a  | Q18AN5 Q18AN5_CLOD6 |
|                             |       |        |   |                 |                                                      |                     |
| TLLYAINGGVDEKSGVQVQPR       | 38    | 725.2  | 3 |                 | Formate acetyltransferase OS=Clostridium difficile ( | Q189V5 Q189V5_CLOD6 |
| VSIDTSSVQYENDDLM*R          | 84    | 994.3  | 2 | Oxidation (M)   | Formate acetyltransferase OS=Clostridium difficile ( | Q189V5 Q189V5_CLOD6 |
| SGIITGLPDAYGR               | 47    | 660.3  | 2 |                 | Formate acetyltransferase OS=Clostridium difficile ( | Q189V5 Q189V5_CLOD6 |
| ATLEDAM*EHPEEYPQLTIR        | 53    | 753.6  | 3 | Oxidation (M)   | Formate acetyltransferase OS=Clostridium difficile ( | Q189V5 Q189V5_CLOD6 |
| M*VENSCEAFGYELDPEIKDIFTK    | 55    | 917.6  | 3 | Oxidation (M)   | Formate acetyltransferase OS=Clostridium difficile ( | Q189V5 Q189V5_CLOD6 |
| EFIQLNYSPEYEGNDSFLAGATENTK  | 41    | 937.0  | 3 |                 | Formate acetyltransferase OS=Clostridium difficile ( | Q189V5 Q189V5_CLOD6 |
| EQQLDVINR                   | 40    | 557.7  | 2 |                 | Formate acetyltransferase OS=Clostridium difficile ( | Q189V5 Q189V5_CLOD6 |
| LPYEHAQDGISNTFSIVPAALGK     | 30    | 810.0  | 3 |                 | Formate acetyltransferase OS=Clostridium difficile ( | Q189V5 Q189V5_CLOD6 |
| VALYGVDALEDKNEQK            | 36    | 635.5  | 3 |                 | Formate acetyltransferase OS=Clostridium difficile ( | Q189V5 Q189V5_CLOD6 |
| M*AESYGFDISKPATNSK          | 47    | 621.5  | 3 | Oxidation (M)   | Formate acetyltransferase OS=Clostridium difficile ( | Q189V5 Q189V5_CLOD6 |
| DQNGAAM*SLGR                | 37    | 568.2  | 2 | Oxidation (M)   | Formate acetyltransferase OS=Clostridium difficile ( | Q189V5 Q189V5_CLOD6 |
| VSGYAVNFIK                  | 47    | 549.2  | 2 |                 | Formate acetyltransferase OS=Clostridium difficile ( | Q189V5 Q189V5_CLOD6 |
| TLLYAINGGVDEK               | 82    | 696.8  | 2 |                 | Formate acetyltransferase OS=Clostridium difficile ( | Q189V5 Q189V5_CLOD6 |
| KSGIITGLPDAYGR              | 51    | 724.3  | 2 |                 | Formate acetyltransferase OS=Clostridium difficile ( | Q189V5 Q189V5_CLOD6 |
| EFIQLNYSPEYEGNDSFLAGATENTKK | 36    | 979.7  | 3 |                 | Formate acetyltransferase OS=Clostridium difficile ( | Q189V5 Q189V5_CLOD6 |
| TSTFLDIYFER                 | 66    | 696.3  | 2 |                 | Formate acetyltransferase OS=Clostridium difficile ( | Q189V5 Q189V5_CLOD6 |
| DTNGALASLSSVAK              | 32    | 667.9  | 2 |                 | Formate acetyltransferase OS=Clostridium difficile ( | Q189V5 Q189V5_CLOD6 |
| QM*QFFGAR                   | 31    | 500.6  | 2 | Oxidation (M)   | Formate acetyltransferase OS=Clostridium difficile ( | Q189V5 Q189V5_CLOD6 |
| YGNDDRVDISIAVELVESFM*NK     | 54    | 844.6  | 3 | Oxidation (M)   | Formate acetyltransferase OS=Clostridium difficile ( | Q189V5 Q189V5_CLOD6 |
|                             |       |        |   |                 |                                                      |                     |
| YNLDIIDVITEDNK              | 102   | 832.8  | 2 |                 | Leucyl-tRNA synthetase OS=Clostridium difficile (str | Q182K8 SYL_CLOD6    |
| YVDSNNENEPFSKELVNR          | 44    | 718.6  | 3 |                 | Leucyl-tRNA synthetase OS=Clostridium difficile (str | Q182K8 SYL_CLOD6    |
| YVDSNNENEPFSK               | 86    | 771.8  | 2 |                 | Leucyl-tRNA synthetase OS=Clostridium difficile (str | Q182K8 SYL_CLOD6    |
| DLEQWYFK                    | 32    | 564.7  | 2 |                 | Leucyl-tRNA synthetase OS=Clostridium difficile (str | Q182K8 SYL_CLOD6    |
| GNTVSPM*DIIDEYGADTAR        | 89    | 1021.4 | 2 | Oxidation (M)   | Leucyl-tRNA synthetase OS=Clostridium difficile (str | Q182K8 SYL_CLOD6    |
| LFVLF AAPPER                | 36    | 630.3  | 2 |                 | Leucyl-tRNA synthetase OS=Clostridium difficile (str | Q182K8 SYL_CLOD6    |
| SM*GM*VDFNEPFK              | 40    | 717.2  | 2 | 2 Oxidation (M) | Leucyl-tRNA synthetase OS=Clostridium difficile (str | Q182K8 SYL_CLOD6    |
| TAADVEKEGM*FIGR             | 38    | 513.8  | 3 | Oxidation (M)   | Leucyl-tRNA synthetase OS=Clostridium difficile (str | Q182K8 SYL_CLOD6    |
| SKGNTVSPM*DIIDEYGADTAR      | 48    | 752.6  | 3 | Oxidation (M)   | Leucyl-tRNA synthetase OS=Clostridium difficile (str | Q182K8 SYL_CLOD6    |
| LVDELADVVKK                 | 35    | 614.8  | 2 |                 | Leucyl-tRNA synthetase OS=Clostridium difficile (str | Q182K8 SYL_CLOD6    |

| Sequence                      | Score | m/z    | z | Modification    | Protein_Name                                            | Protein_ID          |
|-------------------------------|-------|--------|---|-----------------|---------------------------------------------------------|---------------------|
| DVEFGELNSQDKDM*R              | 33    | 600.2  | 3 | Oxidation (M)   | Leucyl-tRNA synthetase OS=Clostridium difficile (str    | Q182K8 SYL_CLOD6    |
| NLLTQGM*VLM*DGSK              | 59    | 769.7  | 2 | 2 Oxidation (M) | Leucyl-tRNA synthetase OS=Clostridium difficile (str    | Q182K8 SYL_CLOD6    |
| EDLPVLLPTDVEFTGKGESPLTTSK     | 31    | 892.0  | 3 |                 | Leucyl-tRNA synthetase OS=Clostridium difficile (str    | Q182K8 SYL_CLOD6    |
| NYSIGDVVAR                    | 38    | 547.2  | 2 |                 | Leucyl-tRNA synthetase OS=Clostridium difficile (str    | Q182K8 SYL_CLOD6    |
| LLNEPYIHNNYTSGDIDTVVPK        | 55    | 835.0  | 3 |                 | Signal peptidase I OS=Clostridium difficile (strain 63  | Q18BJ6 Q18BJ6_CLOD6 |
| VIATEGDRIK                    | 31    | 551.2  | 2 |                 | Signal peptidase I OS=Clostridium difficile (strain 63  | Q18BJ6 Q18BJ6_CLOD6 |
| KNNIPNATLK                    | 39    | 556.8  | 2 |                 | Cell surface protein OS=Clostridium difficile (strain 6 | Q182K4 Q182K4_CLOD6 |
| NNPIVLVDIGSNKDILK             | 31    | 926.5  | 2 |                 | Cell surface protein OS=Clostridium difficile (strain 6 | Q182K4 Q182K4_CLOD6 |
| ILFYNPDGEDFFEYK               | 66    | 948.9  | 2 |                 | Cell surface protein OS=Clostridium difficile (strain 6 | Q182K4 Q182K4_CLOD6 |
| FIHCSGTQTNPNK                 | 34    | 752.3  | 2 |                 | Putative cell wall hydrolase OS=Clostridium difficile   | Q18AZ7 Q18AZ7_CLOD6 |
| VTSAVSLNVR                    | 60    | 523.3  | 2 |                 | Putative cell wall hydrolase OS=Clostridium difficile   | Q18AZ7 Q18AZ7_CLOD6 |
| LNGGDVVELK                    | 44    | 522.2  | 2 |                 | Putative cell wall hydrolase OS=Clostridium difficile   | Q18AZ7 Q18AZ7_CLOD6 |
| SGAGTNYSLVGK                  | 62    | 577.3  | 2 |                 | Putative cell wall hydrolase OS=Clostridium difficile   | Q18AZ7 Q18AZ7_CLOD6 |
| VSSSVVGWGSAAK                 | 64    | 582.2  | 2 |                 | Putative cell wall hydrolase OS=Clostridium difficile   | Q18AZ7 Q18AZ7_CLOD6 |
| HSVGVSIPIR                    | 43    | 476.3  | 2 |                 | Putative cell wall hydrolase OS=Clostridium difficile   | Q18AZ7 Q18AZ7_CLOD6 |
| VDNLTSSYWSKLLGAR              | 32    | 637.2  | 3 |                 | Putative cell wall hydrolase OS=Clostridium difficile   | Q18AZ7 Q18AZ7_CLOD6 |
| SGAGTNYSLVGKANNQDGVK          | 53    | 651.3  | 3 |                 | Putative cell wall hydrolase OS=Clostridium difficile   | Q18AZ7 Q18AZ7_CLOD6 |
| GTVTASALNIR                   | 77    | 551.8  | 2 |                 | Putative cell wall hydrolase OS=Clostridium difficile   | Q18AZ7 Q18AZ7_CLOD6 |
| SGPGTYSYIIGK                  | 39    | 583.7  | 2 |                 | Putative cell wall hydrolase OS=Clostridium difficile   | Q18AZ7 Q18AZ7_CLOD6 |
| VDNLTSSYWSK                   | 64    | 650.3  | 2 |                 | Putative cell wall hydrolase OS=Clostridium difficile   | Q18AZ7 Q18AZ7_CLOD6 |
| YISTSGSSEGTSSQNNSTSSGTTISGNGK | 40    | 933.0  | 3 |                 | Putative cell wall hydrolase OS=Clostridium difficile   | Q18AZ7 Q18AZ7_CLOD6 |
| LYHVDIDANK                    | 48    | 396.5  | 3 |                 | Putative exported protein OS=Clostridium difficile (s   | Q18B20 Q18B20_CLOD6 |
| IEM*YEGVPCSLINSSINTIKFTSK     | 43    | 916.8  | 3 | Oxidation (M)   | Putative exported protein OS=Clostridium difficile (s   | Q18B20 Q18B20_CLOD6 |
| LSQAQLNSVAQATADFM*NKK         | 47    | 727.7  | 3 | Oxidation (M)   | Putative exported protein OS=Clostridium difficile (s   | Q18B20 Q18B20_CLOD6 |
| AYPAVGEVVKTNPTPTVK            | 51    | 1000.0 | 2 |                 | Putative exported protein OS=Clostridium difficile (s   | Q18B20 Q18B20_CLOD6 |
| NMTTDAKIR                     | 55    | 525.2  | 2 |                 | Putative exported protein OS=Clostridium difficile (s   | Q18B20 Q18B20_CLOD6 |
| SYVAGTNSIYGPK                 | 73    | 678.9  | 2 |                 | Putative exported protein OS=Clostridium difficile (s   | Q18B20 Q18B20_CLOD6 |
| LSQAQLNSVAQATADFM*NK          | 89    | 1027.5 | 2 | Oxidation (M)   | Putative exported protein OS=Clostridium difficile (s   | Q18B20 Q18B20_CLOD6 |
| VEIGETASNSGR                  | 76    | 610.2  | 2 |                 | Putative exported protein OS=Clostridium difficile (s   | Q18B20 Q18B20_CLOD6 |
| LSQAQLNSVAQATADFMNK           | 66    | 1019.4 | 2 |                 | Putative exported protein OS=Clostridium difficile (s   | Q18B20 Q18B20_CLOD6 |
| LSQAQLNSVAQATADFMNKK          | 59    | 722.4  | 3 |                 | Putative exported protein OS=Clostridium difficile (s   | Q18B20 Q18B20_CLOD6 |
| LYHVDIDANKSAGADIIYK           | 58    | 702.7  | 3 |                 | Putative exported protein OS=Clostridium difficile (s   | Q18B20 Q18B20_CLOD6 |
| SLTHPLPFDDK                   | 33    | 428.5  | 3 |                 | Putative exported protein OS=Clostridium difficile (s   | Q18B20 Q18B20_CLOD6 |
| KAYPAVGEVVK                   | 36    | 580.8  | 2 |                 | Putative exported protein OS=Clostridium difficile (s   | Q18B20 Q18B20_CLOD6 |
| FEDGRLYHVDIDANK               | 37    | 598.0  | 3 |                 | Putative exported protein OS=Clostridium difficile (s   | Q18B20 Q18B20_CLOD6 |
| SAGADIIYK                     | 67    | 469.2  | 2 |                 | Putative exported protein OS=Clostridium difficile (s   | Q18B20 Q18B20_CLOD6 |

| Sequence                        | Score | m/z    | z | Modification    | Protein_Name                                                              | Protein_ID          |
|---------------------------------|-------|--------|---|-----------------|---------------------------------------------------------------------------|---------------------|
| AYPAVGEVVK                      | 42    | 516.7  | 2 |                 | Putative exported protein OS=Clostridium difficile (strain 6)             | Q18B20 Q18B20_CLOD6 |
| EVANVIFTVWK                     | 52    | 653.3  | 2 |                 | Surface surface protein OS=Clostridium difficile (strain 6)               | Q183N1 Q183N1_CLOD6 |
| GKEPLQVSENLQGMANYWSK            | 47    | 760.2  | 3 |                 | Surface surface protein OS=Clostridium difficile (strain 6)               | Q183N1 Q183N1_CLOD6 |
| APILLSQR                        | 31    | 449.3  | 2 |                 | Surface surface protein OS=Clostridium difficile (strain 6)               | Q183N1 Q183N1_CLOD6 |
| M*VSSEM*YSLVNSYRK               | 32    | 609.2  | 3 | 2 Oxidation (M) | Surface surface protein OS=Clostridium difficile (strain 6)               | Q183N1 Q183N1_CLOD6 |
| SEENIAFVPLTTK                   | 51    | 724.8  | 2 |                 | Surface surface protein OS=Clostridium difficile (strain 6)               | Q183N1 Q183N1_CLOD6 |
| TTSISVEVNVLEYK                  | 55    | 791.3  | 2 |                 | Surface surface protein OS=Clostridium difficile (strain 6)               | Q183N1 Q183N1_CLOD6 |
| M*VSSEM*YSLVNSYR                | 90    | 849.3  | 2 | 2 Oxidation (M) | Surface surface protein OS=Clostridium difficile (strain 6)               | Q183N1 Q183N1_CLOD6 |
| M*VSSEMYSLVNSYRK                | 49    | 603.9  | 3 | Oxidation (M)   | Surface surface protein OS=Clostridium difficile (strain 6)               | Q183N1 Q183N1_CLOD6 |
| SDKYNENM*LSSK                   | 36    | 716.2  | 2 | Oxidation (M)   | Surface surface protein OS=Clostridium difficile (strain 6)               | Q183N1 Q183N1_CLOD6 |
| DSNGNDLTPELIGNINTDKVGK          | 40    | 771.9  | 3 |                 | Surface surface protein OS=Clostridium difficile (strain 6)               | Q183N1 Q183N1_CLOD6 |
| NAAEVFSGGIRSEENIAFVPLTTK        | 49    | 851.0  | 3 |                 | Surface surface protein OS=Clostridium difficile (strain 6)               | Q183N1 Q183N1_CLOD6 |
| DAREVANVIFTVWK                  | 32    | 549.8  | 3 |                 | Surface surface protein OS=Clostridium difficile (strain 6)               | Q183N1 Q183N1_CLOD6 |
| GKEPLQVSENLQGM*ANYWSK           | 46    | 765.6  | 3 | Oxidation (M)   | Surface surface protein OS=Clostridium difficile (strain 6)               | Q183N1 Q183N1_CLOD6 |
| NAAEVFSGGIR                     | 69    | 560.7  | 2 |                 | Surface surface protein OS=Clostridium difficile (strain 6)               | Q183N1 Q183N1_CLOD6 |
| VGAATEVELKER                    | 67    | 651.4  | 2 |                 | 60 kDa chaperonin OS=Clostridium difficile (strain 6)                     | Q18CT5 CH60_CLOD6   |
| LLIIAEDVEGEALSTLVVNKLR          | 39    | 799.1  | 3 |                 | 60 kDa chaperonin OS=Clostridium difficile (strain 6)                     | Q18CT5 CH60_CLOD6   |
| AVTVAVEELKNQSR                  | 55    | 772.4  | 2 |                 | 60 kDa chaperonin OS=Clostridium difficile (strain 6)                     | Q18CT5 CH60_CLOD6   |
| ISNIQELLPVLEQIVQQGKK            | 32    | 760.1  | 3 |                 | 60 kDa chaperonin OS=Clostridium difficile (strain 6)                     | Q18CT5 CH60_CLOD6   |
| GFFLVSDAAGNQFYTR                | 91    | 896.8  | 2 |                 | Flagellar basal-body rod protein FlgG OS=Clostridium difficile (strain 6) | Q18D05 Q18D05_CLOD6 |
| EYEANQKIIQAMDSK                 | 36    | 884.3  | 2 |                 | Flagellar basal-body rod protein FlgG OS=Clostridium difficile (strain 6) | Q18D05 Q18D05_CLOD6 |
| TTDNKMDVAIQGK                   | 66    | 474.1  | 3 |                 | Flagellar basal-body rod protein FlgG OS=Clostridium difficile (strain 6) | Q18D05 Q18D05_CLOD6 |
| IASEIGSVR                       | 67    | 466.2  | 2 |                 | Flagellar basal-body rod protein FlgG OS=Clostridium difficile (strain 6) | Q18D05 Q18D05_CLOD6 |
| LGSISDSVYNK                     | 73    | 591.8  | 2 |                 | Cell surface protein OS=Clostridium difficile (strain 6)                  | Q185Y1 Q185Y1_CLOD6 |
| ETGFCNFGGVLDAFKNPCGLK           | 56    | 806.6  | 3 |                 | Cell surface protein OS=Clostridium difficile (strain 6)                  | Q185Y1 Q185Y1_CLOD6 |
| IYIIGKELSISK                    | 45    | 682.5  | 2 |                 | Cell surface protein OS=Clostridium difficile (strain 6)                  | Q185Y1 Q185Y1_CLOD6 |
| VIKEFYPDASEFYLSGDYDLVNALTGSTIAK | 61    | 1143.1 | 3 |                 | Cell surface protein OS=Clostridium difficile (strain 6)                  | Q185Y1 Q185Y1_CLOD6 |
| SILAGADKTR                      | 55    | 572.8  | 2 |                 | Cell surface protein OS=Clostridium difficile (strain 6)                  | Q185Y1 Q185Y1_CLOD6 |
| MMGEIEATK                       | 46    | 505.2  | 2 |                 | Cell surface protein OS=Clostridium difficile (strain 6)                  | Q185Y1 Q185Y1_CLOD6 |
| EFYPDASEFYLSGDYDLVNALTGSTIAK    | 34    | 1029.3 | 3 |                 | Cell surface protein OS=Clostridium difficile (strain 6)                  | Q185Y1 Q185Y1_CLOD6 |
| GEADTISAAPVSVR                  | 58    | 686.7  | 2 |                 | Cell surface protein OS=Clostridium difficile (strain 6)                  | Q185Y1 Q185Y1_CLOD6 |
| AKTVESLSNNWAGGQYGQDLVR          | 59    | 798.6  | 3 |                 | Cell surface protein OS=Clostridium difficile (strain 6)                  | Q185Y1 Q185Y1_CLOD6 |
| ENPIVLVSESSDK                   | 57    | 708.7  | 2 |                 | Cell surface protein OS=Clostridium difficile (strain 6)                  | Q185Y1 Q185Y1_CLOD6 |
| ENPIVLVSESSDKSILAGADK           | 36    | 724.6  | 3 |                 | Cell surface protein OS=Clostridium difficile (strain 6)                  | Q185Y1 Q185Y1_CLOD6 |
| M*MMGEIEATK                     | 48    | 513.1  | 2 | Oxidation (M)   | Cell surface protein OS=Clostridium difficile (strain 6)                  | Q185Y1 Q185Y1_CLOD6 |
| MM*MMGEIEATK                    | 43    | 513.1  | 2 | Oxidation (M)   | Cell surface protein OS=Clostridium difficile (strain 6)                  | Q185Y1 Q185Y1_CLOD6 |



| Sequence                      | Score | m/z    | z | Modification    | Protein_Name                                            | Protein_ID          |
|-------------------------------|-------|--------|---|-----------------|---------------------------------------------------------|---------------------|
| TVESLSNNWAGGQYGQDLVR          | 96    | 731.9  | 3 |                 | Cell surface protein OS=Clostridium difficile (strain 6 | Q185Y1 Q185Y1_CLOD6 |
| TYAVGGSISM*STSLVNK            | 84    | 866.3  | 2 | Oxidation (M)   | Cell surface protein OS=Clostridium difficile (strain 6 | Q185Y1 Q185Y1_CLOD6 |
| DIAPIVLTDGK                   | 63    | 571.4  | 2 |                 | Cell surface protein OS=Clostridium difficile (strain 6 | Q185Y1 Q185Y1_CLOD6 |
| SVETELKNTGAQVTR               | 58    | 816.9  | 2 |                 | Cell surface protein OS=Clostridium difficile (strain 6 | Q185Y1 Q185Y1_CLOD6 |
| ETGFCNFGGVLDASFK              | 42    | 874.8  | 2 |                 | Cell surface protein OS=Clostridium difficile (strain 6 | Q185Y1 Q185Y1_CLOD6 |
| EVDLTLATGGPGMVK               | 58    | 744.8  | 2 |                 | Aldehyde-alcohol dehydrogenase [includes: alcohol       | Q184F6 Q184F6_CLOD6 |
| TCGVIEKDEAFGM*TK              | 57    | 567.8  | 3 | Oxidation (M)   | Aldehyde-alcohol dehydrogenase [includes: alcohol       | Q184F6 Q184F6_CLOD6 |
| ETGM*GIAEDKVIK                | 46    | 703.8  | 2 | Oxidation (M)   | Aldehyde-alcohol dehydrogenase [includes: alcohol       | Q184F6 Q184F6_CLOD6 |
| EVDLTLATGGPGM*VK              | 66    | 752.3  | 2 | Oxidation (M)   | Aldehyde-alcohol dehydrogenase [includes: alcohol       | Q184F6 Q184F6_CLOD6 |
| LAGFEVVPDVK                   | 43    | 588.2  | 2 |                 | Aldehyde-alcohol dehydrogenase [includes: alcohol       | Q184F6 Q184F6_CLOD6 |
| ANFVAIPTSGTGSEVTPFAVITDQDTGVK | 45    | 998.7  | 3 |                 | Aldehyde-alcohol dehydrogenase [includes: alcohol       | Q184F6 Q184F6_CLOD6 |
| AVTDLLDEM*NIK                 | 67    | 689.2  | 2 | Oxidation (M)   | Aldehyde-alcohol dehydrogenase [includes: alcohol       | Q184F6 Q184F6_CLOD6 |
| NGIIFSPHPR                    | 34    | 380.1  | 3 |                 | Aldehyde-alcohol dehydrogenase [includes: alcohol       | Q184F6 Q184F6_CLOD6 |
| SIFEYLPR                      | 35    | 512.7  | 2 |                 | Aldehyde-alcohol dehydrogenase [includes: alcohol       | Q184F6 Q184F6_CLOD6 |
| LVEDGGFGHTSSLYIDVNR           | 52    | 774.6  | 3 |                 | Aldehyde-alcohol dehydrogenase [includes: alcohol       | Q184F6 Q184F6_CLOD6 |
| LAPSLTLGCGSWGGNSVSENVGK       | 52    | 797.3  | 3 |                 | Aldehyde-alcohol dehydrogenase [includes: alcohol       | Q184F6 Q184F6_CLOD6 |
| IAEPIGVIAAVVPTTNPSTAIK        | 42    | 804.3  | 3 |                 | Aldehyde-alcohol dehydrogenase [includes: alcohol       | Q184F6 Q184F6_CLOD6 |
| NIILVNGGLNSK                  | 56    | 621.2  | 2 |                 | Aldehyde-alcohol dehydrogenase [includes: alcohol       | Q184F6 Q184F6_CLOD6 |
| HTTFFEVEPDPTLECAK             | 33    | 674.2  | 3 |                 | Aldehyde-alcohol dehydrogenase [includes: alcohol       | Q184F6 Q184F6_CLOD6 |
| IFATYSQEQVDK                  | 72    | 714.8  | 2 |                 | Aldehyde-alcohol dehydrogenase [includes: alcohol       | Q184F6 Q184F6_CLOD6 |
| ASDFDDAVR                     | 46    | 498.2  | 2 |                 | Aldehyde-alcohol dehydrogenase [includes: alcohol       | Q184F6 Q184F6_CLOD6 |
| AVTDLLDEMNIK                  | 74    | 681.2  | 2 |                 | Aldehyde-alcohol dehydrogenase [includes: alcohol       | Q184F6 Q184F6_CLOD6 |
| SAYSSGKPAIVGAGNTPAIIDDSADIK   | 63    | 892.6  | 3 |                 | Aldehyde-alcohol dehydrogenase [includes: alcohol       | Q184F6 Q184F6_CLOD6 |
| AM*REFNPDVIISIGGGSAM*DAGK     | 87    | 790.3  | 3 | 2 Oxidation (M) | Aldehyde-alcohol dehydrogenase [includes: alcohol       | Q184F6 Q184F6_CLOD6 |
| LKVGIPK                       | 32    | 377.7  | 2 |                 | Aldehyde-alcohol dehydrogenase [includes: alcohol       | Q184F6 Q184F6_CLOD6 |
| YAGIASFLGLK                   | 52    | 570.2  | 2 |                 | Aldehyde-alcohol dehydrogenase [includes: alcohol       | Q184F6 Q184F6_CLOD6 |
| EFNPDVIISIGGGSAM*DAGK         | 74    | 997.4  | 2 | Oxidation (M)   | Aldehyde-alcohol dehydrogenase [includes: alcohol       | Q184F6 Q184F6_CLOD6 |
| LVEDGGFGHTSSLYIDVNRQEK        | 78    | 860.6  | 3 |                 | Aldehyde-alcohol dehydrogenase [includes: alcohol       | Q184F6 Q184F6_CLOD6 |
| VPLAIMAQK                     | 39    | 485.7  | 2 |                 | Aldehyde-alcohol dehydrogenase [includes: alcohol       | Q184F6 Q184F6_CLOD6 |
| VLIGEVESVEIEEFAHEK            | 100   | 1064.9 | 2 |                 | Aldehyde-alcohol dehydrogenase [includes: alcohol       | Q184F6 Q184F6_CLOD6 |
| TAVNSILVSK                    | 44    | 516.2  | 2 |                 | Aldehyde-alcohol dehydrogenase [includes: alcohol       | Q184F6 Q184F6_CLOD6 |
| ILINTPSSQGGIGDLYNFK           | 97    | 1018.9 | 2 |                 | Aldehyde-alcohol dehydrogenase [includes: alcohol       | Q184F6 Q184F6_CLOD6 |
| VPLAIM*AQK                    | 33    | 493.7  | 2 | Oxidation (M)   | Aldehyde-alcohol dehydrogenase [includes: alcohol       | Q184F6 Q184F6_CLOD6 |
| IVGQTACTIONAK                 | 46    | 581.2  | 2 |                 | Aldehyde-alcohol dehydrogenase [includes: alcohol       | Q184F6 Q184F6_CLOD6 |
| GAYLLDKDETEK                  | 52    | 691.2  | 2 |                 | Aldehyde-alcohol dehydrogenase [includes: alcohol       | Q184F6 Q184F6_CLOD6 |
| YPLM*NEIKDM*YLNSYYGR          | 56    | 767.9  | 3 | 2 Oxidation (M) | Aldehyde-alcohol dehydrogenase [includes: alcohol       | Q184F6 Q184F6_CLOD6 |
| AFIVTDTFLYNNGYTK              | 77    | 933.9  | 2 |                 | Aldehyde-alcohol dehydrogenase [includes: alcohol       | Q184F6 Q184F6_CLOD6 |
| ASDFDDAVRK                    | 33    | 562.2  | 2 |                 | Aldehyde-alcohol dehydrogenase [includes: alcohol       | Q184F6 Q184F6_CLOD6 |

| Sequence                    | Score | m/z    | z | Modification    | Protein_Name                                           | Protein_ID          |
|-----------------------------|-------|--------|---|-----------------|--------------------------------------------------------|---------------------|
| DLGLVTSLETESAELQLTQNTQK     | 79    | 921.1  | 3 |                 | Putative multidrug efflux pump, outer membrane pro     | Q181Z3 Q181Z3_CLOD6 |
| VGGSVDSYMEGK                | 70    | 614.7  | 2 |                 | Putative multidrug efflux pump, outer membrane pro     | Q181Z3 Q181Z3_CLOD6 |
| LQELKNNQDYFK                | 51    | 770.4  | 2 |                 | Putative multidrug efflux pump, outer membrane pro     | Q181Z3 Q181Z3_CLOD6 |
| EAVSAALKNSEK                | 37    | 416.2  | 3 |                 | Putative multidrug efflux pump, outer membrane pro     | Q181Z3 Q181Z3_CLOD6 |
| GLIDSYAQLLALEDTIQITKK       | 55    | 778.7  | 3 |                 | Putative multidrug efflux pump, outer membrane pro     | Q181Z3 Q181Z3_CLOD6 |
| GLIDSYAQLLALEDTIQITK        | 52    | 735.7  | 3 |                 | Putative multidrug efflux pump, outer membrane pro     | Q181Z3 Q181Z3_CLOD6 |
| TSEKEILTAR                  | 35    | 574.3  | 2 |                 | Putative multidrug efflux pump, outer membrane pro     | Q181Z3 Q181Z3_CLOD6 |
| YEKEVEAYNLER                | 45    | 514.9  | 3 |                 | Putative multidrug efflux pump, outer membrane pro     | Q181Z3 Q181Z3_CLOD6 |
| FNTENGLVTLEDSKK             | 35    | 565.9  | 3 |                 | Putative multidrug efflux pump, outer membrane pro     | Q181Z3 Q181Z3_CLOD6 |
|                             |       |        |   |                 |                                                        |                     |
| SVELVSQGK                   | 39    | 473.7  | 2 |                 | Phosphate butyryltransferase OS=Clostridium diffici    | Q18CK4 Q18CK4_CLOD6 |
| SIDM*DIENYELIDIKDLAEASLK    | 57    | 885.7  | 3 | Oxidation (M)   | Phosphate butyryltransferase OS=Clostridium diffici    | Q18CK4 Q18CK4_CLOD6 |
| ADILLAPDIEGGNILYK           | 54    | 907.9  | 2 |                 | Phosphate butyryltransferase OS=Clostridium diffici    | Q18CK4 Q18CK4_CLOD6 |
| IANAILVGDIEK                | 52    | 628.3  | 2 |                 | Phosphate butyryltransferase OS=Clostridium diffici    | Q18CK4 Q18CK4_CLOD6 |
|                             |       |        |   |                 |                                                        |                     |
| GVVDVYPNKPEPK               | 33    | 721.3  | 2 |                 | Phenylalanyl-tRNA synthetase beta chain OS=Clost       | Q189P6 Q189P6_CLOD6 |
| AAQLVEM*LGAGK               | 46    | 602.2  | 2 | Oxidation (M)   | Phenylalanyl-tRNA synthetase beta chain OS=Clost       | Q189P6 Q189P6_CLOD6 |
| LLNPLGEETSVM*R              | 72    | 737.8  | 2 | Oxidation (M)   | Phenylalanyl-tRNA synthetase beta chain OS=Clost       | Q189P6 Q189P6_CLOD6 |
| LVTLDDVER                   | 32    | 530.2  | 2 |                 | Phenylalanyl-tRNA synthetase beta chain OS=Clost       | Q189P6 Q189P6_CLOD6 |
| SLGLAGVM*GGANSEITSNTK       | 68    | 961.9  | 2 | Oxidation (M)   | Phenylalanyl-tRNA synthetase beta chain OS=Clost       | Q189P6 Q189P6_CLOD6 |
|                             |       |        |   |                 |                                                        |                     |
| VNTNVSALIANNQMGR            | 74    | 851.4  | 2 |                 | Flagellin subunit OS=Clostridium difficile (strain 630 | Q18CX7 Q18CX7_CLOD6 |
| MRVNTNVSALIANNQMGR          | 52    | 663.9  | 3 |                 | Flagellin subunit OS=Clostridium difficile (strain 630 | Q18CX7 Q18CX7_CLOD6 |
| M*NILVQASQSM*LAQANQQPQGVLLG | 52    | 971.7  | 3 | 2 Oxidation (M) | Flagellin subunit OS=Clostridium difficile (strain 630 | Q18CX7 Q18CX7_CLOD6 |
| AADDAAGLAISEKMR             | 82    | 507.2  | 3 |                 | Flagellin subunit OS=Clostridium difficile (strain 630 | Q18CX7 Q18CX7_CLOD6 |
| MNILVQASQSM*LAQANQQPQGVLLG  | 49    | 966.4  | 3 | Oxidation (M)   | Flagellin subunit OS=Clostridium difficile (strain 630 | Q18CX7 Q18CX7_CLOD6 |
| LESTQNNLNNTLENTAAESR        | 106   | 1159.4 | 2 |                 | Flagellin subunit OS=Clostridium difficile (strain 630 | Q18CX7 Q18CX7_CLOD6 |
| M*RTLSQLSANEINNTEER         | 33    | 707.8  | 3 | Oxidation (M)   | Flagellin subunit OS=Clostridium difficile (strain 630 | Q18CX7 Q18CX7_CLOD6 |
| TM*VSSLDAALK                | 35    | 576.2  | 2 | Oxidation (M)   | Flagellin subunit OS=Clostridium difficile (strain 630 | Q18CX7 Q18CX7_CLOD6 |
| M*RVNTNVSALIANNQM*GR        | 56    | 674.6  | 3 | 2 Oxidation (M) | Flagellin subunit OS=Clostridium difficile (strain 630 | Q18CX7 Q18CX7_CLOD6 |
| AADDAAGLAISEK               | 87    | 616.2  | 2 |                 | Flagellin subunit OS=Clostridium difficile (strain 630 | Q18CX7 Q18CX7_CLOD6 |
| AADDAAGLAISEKMR             | 66    | 767.7  | 2 | Oxidation (M)   | Flagellin subunit OS=Clostridium difficile (strain 630 | Q18CX7 Q18CX7_CLOD6 |
| SMEKLSSGVR                  | 58    | 547.3  | 2 |                 | Flagellin subunit OS=Clostridium difficile (strain 630 | Q18CX7 Q18CX7_CLOD6 |
| ISSSTEFNGK                  | 38    | 535.2  | 2 |                 | Flagellin subunit OS=Clostridium difficile (strain 630 | Q18CX7 Q18CX7_CLOD6 |
| TLSQLSANEINNTEEREK          | 82    | 1038.4 | 2 |                 | Flagellin subunit OS=Clostridium difficile (strain 630 | Q18CX7 Q18CX7_CLOD6 |
| AQIKGLDQAGR                 | 62    | 578.8  | 2 |                 | Flagellin subunit OS=Clostridium difficile (strain 630 | Q18CX7 Q18CX7_CLOD6 |
| IADELTLQLKDEIER             | 74    | 836.8  | 2 |                 | Flagellin subunit OS=Clostridium difficile (strain 630 | Q18CX7 Q18CX7_CLOD6 |
| IRDTDVASEMVNLSK             | 92    | 839.3  | 2 |                 | Flagellin subunit OS=Clostridium difficile (strain 630 | Q18CX7 Q18CX7_CLOD6 |
| TMVSSLDAALK                 | 62    | 568.2  | 2 |                 | Flagellin subunit OS=Clostridium difficile (strain 630 | Q18CX7 Q18CX7_CLOD6 |
| SM*EKLSSGVR                 | 53    | 555.2  | 2 | Oxidation (M)   | Flagellin subunit OS=Clostridium difficile (strain 630 | Q18CX7 Q18CX7_CLOD6 |

| Sequence                     | Score | m/z    | z | Modification  | Protein_Name                                            | Protein_ID          |
|------------------------------|-------|--------|---|---------------|---------------------------------------------------------|---------------------|
| NVQDGSIVVQTAEGSLEETGNILQR    | 100   | 1329.1 | 2 |               | Flagellin subunit OS=Clostridium difficile (strain 630) | Q18CX7 Q18CX7_CLOD6 |
| MRTLSQLSANEINNTEER           | 51    | 702.9  | 3 |               | Flagellin subunit OS=Clostridium difficile (strain 630) | Q18CX7 Q18CX7_CLOD6 |
| LLDGTSTIR                    | 30    | 531.7  | 2 |               | Flagellin subunit OS=Clostridium difficile (strain 630) | Q18CX7 Q18CX7_CLOD6 |
| M*NILVQASQSMLAQANQQPQGVLLG   | 53    | 966.3  | 3 | Oxidation (M) | Flagellin subunit OS=Clostridium difficile (strain 630) | Q18CX7 Q18CX7_CLOD6 |
| DTDVASEMVNLSK                | 69    | 704.7  | 2 |               | Flagellin subunit OS=Clostridium difficile (strain 630) | Q18CX7 Q18CX7_CLOD6 |
| TLSLQANEINNTEER              | 92    | 909.9  | 2 |               | Flagellin subunit OS=Clostridium difficile (strain 630) | Q18CX7 Q18CX7_CLOD6 |
| LGAQQNRLESTQNNLNNTLENTAAESR  | 74    | 1029.4 | 3 |               | Flagellin subunit OS=Clostridium difficile (strain 630) | Q18CX7 Q18CX7_CLOD6 |
| VNTNVSALIANNQM*GR            | 93    | 859.4  | 2 | Oxidation (M) | Flagellin subunit OS=Clostridium difficile (strain 630) | Q18CX7 Q18CX7_CLOD6 |
| GLDQAGRNVDGIVVQTAEGSLEETGNIL | 57    | 1118.9 | 3 |               | Flagellin subunit OS=Clostridium difficile (strain 630) | Q18CX7 Q18CX7_CLOD6 |
| RAADDAAGLAISEK               | 76    | 694.3  | 2 |               | Flagellin subunit OS=Clostridium difficile (strain 630) | Q18CX7 Q18CX7_CLOD6 |
| IRDTDVASEM*VNLSK             | 63    | 565.3  | 3 | Oxidation (M) | Flagellin subunit OS=Clostridium difficile (strain 630) | Q18CX7 Q18CX7_CLOD6 |
| MNILVQASQSMLAQANQQPQGVLLG    | 34    | 961.0  | 3 |               | Flagellin subunit OS=Clostridium difficile (strain 630) | Q18CX7 Q18CX7_CLOD6 |
|                              |       |        |   |               |                                                         |                     |
| YIGLVLDNAQNINK               | 87    | 788.3  | 2 |               | Putative uncharacterized protein OS=Clostridium dif     | Q189L6 Q189L6_CLOD6 |
| NLGLSEFLQGK                  | 78    | 667.7  | 2 |               | Putative uncharacterized protein OS=Clostridium dif     | Q189L6 Q189L6_CLOD6 |
|                              |       |        |   |               |                                                         |                     |
| QALGILSILM*DR                | 33    | 673.7  | 2 | Oxidation (M) | Glycyl-tRNA synthetase beta subunit OS=Clostridiu       | Q182B8 SYGB_CLOD6   |
| LSADILDSDLGLVDEKTDITR        | 98    | 725.3  | 3 |               | Glycyl-tRNA synthetase beta subunit OS=Clostridiu       | Q182B8 SYGB_CLOD6   |
| IAVDAENNLTKPALGFIK           | 40    | 638.6  | 3 |               | Glycyl-tRNA synthetase beta subunit OS=Clostridiu       | Q182B8 SYGB_CLOD6   |
|                              |       |        |   |               |                                                         |                     |
| STLAQQTLTSYK                 | 72    | 699.3  | 2 |               | Acd OS=Clostridium difficile (strain 630) GN=acd        | Q5S4P9 Q5S4P9_CLOD6 |
| SGPNTSYGLLGLPK               | 44    | 511.3  | 3 |               | Acd OS=Clostridium difficile (strain 630) GN=acd        | Q5S4P9 Q5S4P9_CLOD6 |
| VYNFFGIGAIK                  | 58    | 672.3  | 2 |               | Acd OS=Clostridium difficile (strain 630) GN=acd        | Q5S4P9 Q5S4P9_CLOD6 |
| QVISNSLNMR                   | 47    | 581.7  | 2 |               | Acd OS=Clostridium difficile (strain 630) GN=acd        | Q5S4P9 Q5S4P9_CLOD6 |
| GSKVEVISESNGWSK              | 43    | 803.8  | 2 |               | Acd OS=Clostridium difficile (strain 630) GN=acd        | Q5S4P9 Q5S4P9_CLOD6 |
| GGSSLVFEVPQYK                | 48    | 705.8  | 2 |               | Acd OS=Clostridium difficile (strain 630) GN=acd        | Q5S4P9 Q5S4P9_CLOD6 |
| YNQNTIYK                     | 41    | 522.2  | 2 |               | Acd OS=Clostridium difficile (strain 630) GN=acd        | Q5S4P9 Q5S4P9_CLOD6 |
| TKQVNTTSLNVR                 | 60    | 680.8  | 2 |               | Acd OS=Clostridium difficile (strain 630) GN=acd        | Q5S4P9 Q5S4P9_CLOD6 |
| NQGAAFINAAK                  | 49    | 552.7  | 2 |               | Acd OS=Clostridium difficile (strain 630) GN=acd        | Q5S4P9 Q5S4P9_CLOD6 |
| QVISNSLNM*R                  | 53    | 589.2  | 2 | Oxidation (M) | Acd OS=Clostridium difficile (strain 630) GN=acd        | Q5S4P9 Q5S4P9_CLOD6 |
| TSSFVNASSSDIEYYLNPK          | 48    | 1061.8 | 2 |               | Acd OS=Clostridium difficile (strain 630) GN=acd        | Q5S4P9 Q5S4P9_CLOD6 |
| NTDKVVNTASLNVR               | 64    | 765.8  | 2 |               | Acd OS=Clostridium difficile (strain 630) GN=acd        | Q5S4P9 Q5S4P9_CLOD6 |
| LGYSVSSYLGDVSNSTNK           | 97    | 945.8  | 2 |               | Acd OS=Clostridium difficile (strain 630) GN=acd        | Q5S4P9 Q5S4P9_CLOD6 |
| WISQNYVNSSK                  | 45    | 663.2  | 2 |               | Acd OS=Clostridium difficile (strain 630) GN=acd        | Q5S4P9 Q5S4P9_CLOD6 |
| QVNTTSLNVR                   | 45    | 566.2  | 2 |               | Acd OS=Clostridium difficile (strain 630) GN=acd        | Q5S4P9 Q5S4P9_CLOD6 |
|                              |       |        |   |               |                                                         |                     |
| VGDTPEGIDK                   | 54    | 405.2  | 3 |               | Flagellar hook protein OS=Clostridium difficile (strai  | Q18CZ4 Q18CZ4_CLOD6 |
| VGDTPEGIDK                   | 35    | 486.6  | 2 |               | Flagellar hook protein OS=Clostridium difficile (strai  | Q18CZ4 Q18CZ4_CLOD6 |
| GKEPIVPLQISPK                | 41    | 803.4  | 2 |               | Flagellar hook protein OS=Clostridium difficile (strai  | Q18CZ4 Q18CZ4_CLOD6 |
| LDVIGNNVANAGTTSFKK           | 31    | 617.2  | 3 |               | Flagellar hook protein OS=Clostridium difficile (strai  | Q18CZ4 Q18CZ4_CLOD6 |

| Sequence                       | Score | m/z    | z | Modification    | Protein_Name                                               | Protein_ID          |
|--------------------------------|-------|--------|---|-----------------|------------------------------------------------------------|---------------------|
| AMYSGVSGMK                     | 39    | 515.7  | 2 |                 | Flagellar hook protein OS=Clostridium difficile (strain 6) | Q18CZ4 Q18CZ4_CLOD6 |
| DGTVQNVLEYNISKDGTVEFLLSDGQR    | 39    | 1000.0 | 3 |                 | Flagellar hook protein OS=Clostridium difficile (strain 6) | Q18CZ4 Q18CZ4_CLOD6 |
| DGTVQNVLEYNISK                 | 58    | 790.3  | 2 |                 | Flagellar hook protein OS=Clostridium difficile (strain 6) | Q18CZ4 Q18CZ4_CLOD6 |
| TQFVYDIPDGAK                   | 54    | 677.2  | 2 |                 | Flagellar hook protein OS=Clostridium difficile (strain 6) | Q18CZ4 Q18CZ4_CLOD6 |
| DGTVEFLLSDGQR                  | 63    | 718.8  | 2 |                 | Flagellar hook protein OS=Clostridium difficile (strain 6) | Q18CZ4 Q18CZ4_CLOD6 |
| ITDSFYQTVLYASAPTAALGGTNLGQVGVG | 33    | 1063.0 | 3 |                 | Flagellar hook protein OS=Clostridium difficile (strain 6) | Q18CZ4 Q18CZ4_CLOD6 |
|                                |       |        |   |                 |                                                            |                     |
| HSSDEEPPFSALAFK                | 51    | 782.8  | 2 |                 | Elongation factor G OS=Clostridium difficile (strain 6)    | Q18CF4 EFG_CLOD6    |
| GILADGEEAERHSSDEEPPFSALAFK     | 48    | 902.3  | 3 |                 | Elongation factor G OS=Clostridium difficile (strain 6)    | Q18CF4 EFG_CLOD6    |
| EKLVESVAETDEELM*M*K            | 51    | 671.5  | 3 | 2 Oxidation (M) | Elongation factor G OS=Clostridium difficile (strain 6)    | Q18CF4 EFG_CLOD6    |
| SGAQVINAFVPLSEMFYSTDLR         | 58    | 834.6  | 3 |                 | Elongation factor G OS=Clostridium difficile (strain 6)    | Q18CF4 EFG_CLOD6    |
| VYAGDIAAAVGLK                  | 61    | 624.2  | 2 |                 | Elongation factor G OS=Clostridium difficile (strain 6)    | Q18CF4 EFG_CLOD6    |
| LNSNAVPM*QLPIGKEDSFIGIIDLLK    | 75    | 947.7  | 3 | Oxidation (M)   | Elongation factor G OS=Clostridium difficile (strain 6)    | Q18CF4 EFG_CLOD6    |
| YLEGEELTIDELKVAIR              | 70    | 664.3  | 3 |                 | Elongation factor G OS=Clostridium difficile (strain 6)    | Q18CF4 EFG_CLOD6    |
| VLDGSVAVFCAK                   | 63    | 633.2  | 2 |                 | Elongation factor G OS=Clostridium difficile (strain 6)    | Q18CF4 EFG_CLOD6    |
| QAETYGVPR                      | 45    | 510.8  | 2 |                 | Elongation factor G OS=Clostridium difficile (strain 6)    | Q18CF4 EFG_CLOD6    |
| INIIDTPGHVDFTVEVER             | 67    | 685.3  | 3 |                 | Elongation factor G OS=Clostridium difficile (strain 6)    | Q18CF4 EFG_CLOD6    |
| ETITQPVDVEYKYSK                | 37    | 600.6  | 3 |                 | Elongation factor G OS=Clostridium difficile (strain 6)    | Q18CF4 EFG_CLOD6    |
| GLIQGM*EAR                     | 33    | 495.6  | 2 | Oxidation (M)   | Elongation factor G OS=Clostridium difficile (strain 6)    | Q18CF4 EFG_CLOD6    |
| ETITQPVDVEYK                   | 44    | 711.2  | 2 |                 | Elongation factor G OS=Clostridium difficile (strain 6)    | Q18CF4 EFG_CLOD6    |
| LVESVAETDEELM*M*K              | 57    | 878.3  | 2 | 2 Oxidation (M) | Elongation factor G OS=Clostridium difficile (strain 6)    | Q18CF4 EFG_CLOD6    |
| LAEDPTFTVK                     | 55    | 625.2  | 2 |                 | Elongation factor G OS=Clostridium difficile (strain 6)    | Q18CF4 EFG_CLOD6    |
| GILADGEEAER                    | 55    | 580.2  | 2 |                 | Elongation factor G OS=Clostridium difficile (strain 6)    | Q18CF4 EFG_CLOD6    |
| VYSGTLESQSYVLNATK              | 112   | 894.8  | 2 |                 | Elongation factor G OS=Clostridium difficile (strain 6)    | Q18CF4 EFG_CLOD6    |
| IM*TDPFVVK                     | 44    | 512.2  | 2 | Oxidation (M)   | Elongation factor G OS=Clostridium difficile (strain 6)    | Q18CF4 EFG_CLOD6    |
| ATYTM*IFDHYEQVPASVAK           | 41    | 729.9  | 3 | Oxidation (M)   | Elongation factor G OS=Clostridium difficile (strain 6)    | Q18CF4 EFG_CLOD6    |
| ATYTMIFDHYEQVPASVAK            | 43    | 724.6  | 3 |                 | Elongation factor G OS=Clostridium difficile (strain 6)    | Q18CF4 EFG_CLOD6    |
| GITITSAATTASWK                 | 84    | 704.2  | 2 |                 | Elongation factor G OS=Clostridium difficile (strain 6)    | Q18CF4 EFG_CLOD6    |
| ILQM*HANTREEITK                | 36    | 567.2  | 3 | Oxidation (M)   | Elongation factor G OS=Clostridium difficile (strain 6)    | Q18CF4 EFG_CLOD6    |
| VGAPQVAYR                      | 66    | 480.8  | 2 |                 | Elongation factor G OS=Clostridium difficile (strain 6)    | Q18CF4 EFG_CLOD6    |
| SGAQVINAFVPLSEM*FGYSTDLR       | 35    | 840.3  | 3 | Oxidation (M)   | Elongation factor G OS=Clostridium difficile (strain 6)    | Q18CF4 EFG_CLOD6    |
| YLEGEELTIDELK                  | 77    | 776.4  | 2 |                 | Elongation factor G OS=Clostridium difficile (strain 6)    | Q18CF4 EFG_CLOD6    |
| IAFVNKM*DILGADFYNVVM*M*K       | 58    | 852.3  | 3 | 3 Oxidation (M) | Elongation factor G OS=Clostridium difficile (strain 6)    | Q18CF4 EFG_CLOD6    |
| AAQEKM*GIALQK                  | 35    | 652.3  | 2 | Oxidation (M)   | Elongation factor G OS=Clostridium difficile (strain 6)    | Q18CF4 EFG_CLOD6    |
| GGVEPQSENVWR                   | 55    | 679.2  | 2 |                 | Elongation factor G OS=Clostridium difficile (strain 6)    | Q18CF4 EFG_CLOD6    |
|                                |       |        |   |                 |                                                            |                     |
| AVELLLDGK                      | 41    | 479.1  | 2 |                 | 6-phosphofructokinase OS=Clostridium difficile (strain 6)  | Q180P4 K6PF_CLOD6   |
| VTVLGHVQR                      | 39    | 504.7  | 2 |                 | 6-phosphofructokinase OS=Clostridium difficile (strain 6)  | Q180P4 K6PF_CLOD6   |
| GLLEEDLTEMNLSSVGDIIHR          | 66    | 781.3  | 3 |                 | 6-phosphofructokinase OS=Clostridium difficile (strain 6)  | Q180P4 K6PF_CLOD6   |
| IIDLEISEALQK                   | 47    | 721.8  | 2 |                 | 6-phosphofructokinase OS=Clostridium difficile (strain 6)  | Q180P4 K6PF_CLOD6   |

| Sequence                        | Score | m/z    | z | Modification  | Protein_Name                                          | Protein_ID          |
|---------------------------------|-------|--------|---|---------------|-------------------------------------------------------|---------------------|
| VNIVEVM*GR                      | 32    | 516.7  | 2 | Oxidation (M) | 6-phosphofructokinase OS=Clostridium difficile (stra  | Q180P4 K6PF_CLOD6   |
| GLLEEDLTEM*NLSSVGDIIHR          | 90    | 786.6  | 3 | Oxidation (M) | 6-phosphofructokinase OS=Clostridium difficile (stra  | Q180P4 K6PF_CLOD6   |
| SGKDVNVFEM*AQSQVK               | 40    | 594.8  | 3 | Oxidation (M) | NAD-specific glutamate dehydrogenase OS=Clostrid      | Q18CS0 Q18CS0_CLOD6 |
| GGIIVDPSTLSQGELER               | 84    | 885.9  | 2 |               | NAD-specific glutamate dehydrogenase OS=Clostrid      | Q18CS0 Q18CS0_CLOD6 |
| LVCEAANGPTTPEADEVFAER           | 68    | 759.3  | 3 |               | NAD-specific glutamate dehydrogenase OS=Clostrid      | Q18CS0 Q18CS0_CLOD6 |
| TAATGFGVAVTAR                   | 88    | 611.3  | 2 |               | NAD-specific glutamate dehydrogenase OS=Clostrid      | Q18CS0 Q18CS0_CLOD6 |
| VIEVSIPVKM*DDGSIK               | 31    | 582.9  | 3 | Oxidation (M) | NAD-specific glutamate dehydrogenase OS=Clostrid      | Q18CS0 Q18CS0_CLOD6 |
| GGIIVDPSTLSQGELERLSR            | 35    | 709.7  | 3 |               | NAD-specific glutamate dehydrogenase OS=Clostrid      | Q18CS0 Q18CS0_CLOD6 |
| FGNAAYATK                       | 31    | 472.2  | 2 |               | Putative O-acetylhomoserine sulfhydrylase OS=Clos     | Q187D4 Q187D4_CLOD6 |
| QLTEEQLIASGVLP SLIR             | 43    | 656.3  | 3 |               | Putative O-acetylhomoserine sulfhydrylase OS=Clos     | Q187D4 Q187D4_CLOD6 |
| HVPVIEVDGNNTVVK                 | 43    | 540.5  | 3 |               | Rubredoxin oxidoreductase (Desulfoferrodoxin) OS=     | Q18A22 Q18A22_CLOD6 |
| ELVPNTTDAAVEK                   | 66    | 693.7  | 2 |               | Rubredoxin oxidoreductase (Desulfoferrodoxin) OS=     | Q18A22 Q18A22_CLOD6 |
| CLAVDGEPPVK                     | 38    | 594.2  | 2 |               | Rubredoxin oxidoreductase (Desulfoferrodoxin) OS=     | Q18A22 Q18A22_CLOD6 |
| VGDSTAGIAINLPSTGLEAYAGKGTTFDFNK | 61    | 1004.5 | 3 |               | Cell surface protein (S-layer protein) OS=Clostridium | Q183M8 Q183M8_CLOD6 |
| MKDLLDM                         | 45    | 433.2  | 2 |               | Cell surface protein (S-layer protein) OS=Clostridium | Q183M8 Q183M8_CLOD6 |
| VYLAGGVNSISK                    | 48    | 604.3  | 2 |               | Cell surface protein (S-layer protein) OS=Clostridium | Q183M8 Q183M8_CLOD6 |
| TYNNTYSNVVTVAGEDRIETAIELSSK     | 36    | 992.4  | 3 |               | Cell surface protein (S-layer protein) OS=Clostridium | Q183M8 Q183M8_CLOD6 |
| VMNLKSDTGINTSK                  | 64    | 754.4  | 2 |               | Cell surface protein (S-layer protein) OS=Clostridium | Q183M8 Q183M8_CLOD6 |
| EESIDIDASSYTS AENLAK            | 95    | 1021.8 | 2 |               | Cell surface protein (S-layer protein) OS=Clostridium | Q183M8 Q183M8_CLOD6 |
| YYNSDDKNAITDK                   | 81    | 773.9  | 2 |               | Cell surface protein (S-layer protein) OS=Clostridium | Q183M8 Q183M8_CLOD6 |
| LSGEDRYETSLAI ADEIGLDNDK        | 53    | 842.0  | 3 |               | Cell surface protein (S-layer protein) OS=Clostridium | Q183M8 Q183M8_CLOD6 |
| VM*NLKSDTGINTSK                 | 61    | 508.5  | 3 | Oxidation (M) | Cell surface protein (S-layer protein) OS=Clostridium | Q183M8 Q183M8_CLOD6 |
| AIVALQNDGIESNLVQLVNGKYQVIFYPEGK | 52    | 1140.9 | 3 |               | Cell surface protein (S-layer protein) OS=Clostridium | Q183M8 Q183M8_CLOD6 |
| VINAKEESIDIDASSYTS AENLAK       | 102   | 1284.6 | 2 |               | Cell surface protein (S-layer protein) OS=Clostridium | Q183M8 Q183M8_CLOD6 |
| AFVVGGTGLADAM*SIAPVASQLK        | 31    | 740.5  | 3 | Oxidation (M) | Cell surface protein (S-layer protein) OS=Clostridium | Q183M8 Q183M8_CLOD6 |
| TAPLLLTSK                       | 32    | 472.3  | 2 |               | Cell surface protein (S-layer protein) OS=Clostridium | Q183M8 Q183M8_CLOD6 |
| DGGTNLVQVGK                     | 55    | 544.2  | 2 |               | Cell surface protein (S-layer protein) OS=Clostridium | Q183M8 Q183M8_CLOD6 |
| EISDDAKSFLGTS DVDIIGGK          | 38    | 723.2  | 3 |               | Cell surface protein (S-layer protein) OS=Clostridium | Q183M8 Q183M8_CLOD6 |
| DVATFGLK                        | 34    | 425.7  | 2 |               | Cell surface protein (S-layer protein) OS=Clostridium | Q183M8 Q183M8_CLOD6 |
| SGGSEDTGYV VEMK                 | 83    | 729.8  | 2 |               | Cell surface protein (S-layer protein) OS=Clostridium | Q183M8 Q183M8_CLOD6 |
| MKDLLDM*                        | 43    | 441.2  | 2 | Oxidation (M) | Cell surface protein (S-layer protein) OS=Clostridium | Q183M8 Q183M8_CLOD6 |
| IITNQADAE AIVTK                 | 117   | 743.9  | 2 |               | Cell surface protein (S-layer protein) OS=Clostridium | Q183M8 Q183M8_CLOD6 |
| SFLGTS DVDIIGGK                 | 82    | 704.8  | 2 |               | Cell surface protein (S-layer protein) OS=Clostridium | Q183M8 Q183M8_CLOD6 |
| DGDATPIVVVDGK                   | 68    | 643.3  | 2 |               | Cell surface protein (S-layer protein) OS=Clostridium | Q183M8 Q183M8_CLOD6 |
| DGDATPIVVVDGKAK                 | 38    | 495.6  | 3 |               | Cell surface protein (S-layer protein) OS=Clostridium | Q183M8 Q183M8_CLOD6 |
| AVPKDGGTNLVQVGK                 | 33    | 741.9  | 2 |               | Cell surface protein (S-layer protein) OS=Clostridium | Q183M8 Q183M8_CLOD6 |

| Sequence                        | Score | m/z    | z | Modification    | Protein_Name                                          | Protein_ID          |
|---------------------------------|-------|--------|---|-----------------|-------------------------------------------------------|---------------------|
| VYLAGGVNSISKDVENELK             | 58    | 1018.0 | 2 |                 | Cell surface protein (S-layer protein) OS=Clostridium | Q183M8 Q183M8_CLOD6 |
| DVENELKNNM*GLK                  | 35    | 703.4  | 2 | Oxidation (M)   | Cell surface protein (S-layer protein) OS=Clostridium | Q183M8 Q183M8_CLOD6 |
| NSVSKEIEESIDSATGK               | 50    | 598.6  | 3 |                 | Cell surface protein (S-layer protein) OS=Clostridium | Q183M8 Q183M8_CLOD6 |
| VGDSTAGIAINLPSTGLEAYGK          | 79    | 1067.9 | 2 |                 | Cell surface protein (S-layer protein) OS=Clostridium | Q183M8 Q183M8_CLOD6 |
| DGGTNLVQVGKGIASSVINK            | 67    | 653.1  | 3 |                 | Cell surface protein (S-layer protein) OS=Clostridium | Q183M8 Q183M8_CLOD6 |
| M*KDLLDM*                       | 32    | 449.2  | 2 | 2 Oxidation (M) | Cell surface protein (S-layer protein) OS=Clostridium | Q183M8 Q183M8_CLOD6 |
| TLIDIATKDTFGM*VSK               | 65    | 586.0  | 3 | Oxidation (M)   | Cell surface protein (S-layer protein) OS=Clostridium | Q183M8 Q183M8_CLOD6 |
| TLIDIATKDTFGMVSK                | 71    | 870.5  | 2 |                 | Cell surface protein (S-layer protein) OS=Clostridium | Q183M8 Q183M8_CLOD6 |
| AVNDIVLVGSTSIVDGLVASPLASEK      | 53    | 852.5  | 3 |                 | Cell surface protein (S-layer protein) OS=Clostridium | Q183M8 Q183M8_CLOD6 |
| YVFDPEISEAYKAIVALQNDGIESNLVQLVI | 35    | 1251.2 | 3 |                 | Cell surface protein (S-layer protein) OS=Clostridium | Q183M8 Q183M8_CLOD6 |
| IITNQADAEAVTKLNSLNEK            | 99    | 1143.1 | 2 |                 | Cell surface protein (S-layer protein) OS=Clostridium | Q183M8 Q183M8_CLOD6 |
| LYNLVNTQLDK                     | 67    | 660.9  | 2 |                 | Cell surface protein (S-layer protein) OS=Clostridium | Q183M8 Q183M8_CLOD6 |
| AIVALQNDGIESNLVQLVNGK           | 89    | 1098.1 | 2 |                 | Cell surface protein (S-layer protein) OS=Clostridium | Q183M8 Q183M8_CLOD6 |
| RYVFDPEISEAYK                   | 39    | 578.3  | 3 |                 | Cell surface protein (S-layer protein) OS=Clostridium | Q183M8 Q183M8_CLOD6 |
| EIEESIDSATGK                    | 60    | 639.8  | 2 |                 | Cell surface protein (S-layer protein) OS=Clostridium | Q183M8 Q183M8_CLOD6 |
| QATNAEVLKEDDYFTDGEVVNYFVAK      | 67    | 989.4  | 3 |                 | Cell surface protein (S-layer protein) OS=Clostridium | Q183M8 Q183M8_CLOD6 |
| QLQDGLKDNISIGK                  | 38    | 473.0  | 3 |                 | Cell surface protein (S-layer protein) OS=Clostridium | Q183M8 Q183M8_CLOD6 |
| ESPAPILATDTLSSDQNVAVSK          | 57    | 786.1  | 3 |                 | Cell surface protein (S-layer protein) OS=Clostridium | Q183M8 Q183M8_CLOD6 |
| FKESPAPILATDTLSSDQNVAVSK        | 71    | 878.1  | 3 |                 | Cell surface protein (S-layer protein) OS=Clostridium | Q183M8 Q183M8_CLOD6 |
| SFLGTSVDVIIGGKNSVSK             | 57    | 962.4  | 2 |                 | Cell surface protein (S-layer protein) OS=Clostridium | Q183M8 Q183M8_CLOD6 |
| SANDTIASQDTPAKVVIK              | 69    | 620.0  | 3 |                 | Cell surface protein (S-layer protein) OS=Clostridium | Q183M8 Q183M8_CLOD6 |
| DTFGM*VSKTQDSEGK                | 36    | 549.5  | 3 | Oxidation (M)   | Cell surface protein (S-layer protein) OS=Clostridium | Q183M8 Q183M8_CLOD6 |
| KVYLAGGVNSISK                   | 74    | 668.4  | 2 |                 | Cell surface protein (S-layer protein) OS=Clostridium | Q183M8 Q183M8_CLOD6 |
| DGSTKEDQLVDALAAPIAGR            | 81    | 1049.4 | 2 |                 | Cell surface protein (S-layer protein) OS=Clostridium | Q183M8 Q183M8_CLOD6 |
| IETAIELSSK                      | 64    | 545.8  | 2 |                 | Cell surface protein (S-layer protein) OS=Clostridium | Q183M8 Q183M8_CLOD6 |
| YVFDPEISEAYK                    | 72    | 788.2  | 2 |                 | Cell surface protein (S-layer protein) OS=Clostridium | Q183M8 Q183M8_CLOD6 |
| VKDVATFGLK                      | 42    | 539.3  | 2 |                 | Cell surface protein (S-layer protein) OS=Clostridium | Q183M8 Q183M8_CLOD6 |
| VDVTGGSTPSAVAVSGFVTK            | 76    | 939.9  | 2 |                 | Cell surface protein (S-layer protein) OS=Clostridium | Q183M8 Q183M8_CLOD6 |
| DTFGMVSK                        | 39    | 442.7  | 2 |                 | Cell surface protein (S-layer protein) OS=Clostridium | Q183M8 Q183M8_CLOD6 |
| YQVIFYPEGK                      | 48    | 622.3  | 2 |                 | Cell surface protein (S-layer protein) OS=Clostridium | Q183M8 Q183M8_CLOD6 |
| ITVSFNDGVVGEVAPK                | 114   | 816.4  | 2 |                 | Cell surface protein (S-layer protein) OS=Clostridium | Q183M8 Q183M8_CLOD6 |
| GTTIDFNKTLK                     | 42    | 619.3  | 2 |                 | Cell surface protein (S-layer protein) OS=Clostridium | Q183M8 Q183M8_CLOD6 |
| VDVTGGSTPSAVAVSGFVTKDDTDLAK     | 64    | 880.0  | 3 |                 | Cell surface protein (S-layer protein) OS=Clostridium | Q183M8 Q183M8_CLOD6 |
| EIEESIDSATGKTPDR                | 73    | 874.3  | 2 |                 | Cell surface protein (S-layer protein) OS=Clostridium | Q183M8 Q183M8_CLOD6 |
| LNSLNEKTLIDIATK                 | 64    | 837.0  | 2 |                 | Cell surface protein (S-layer protein) OS=Clostridium | Q183M8 Q183M8_CLOD6 |
| SGGSEDTGYVEM*K                  | 83    | 737.7  | 2 | Oxidation (M)   | Cell surface protein (S-layer protein) OS=Clostridium | Q183M8 Q183M8_CLOD6 |
| TAPLLLTSKDK                     | 47    | 593.8  | 2 |                 | Cell surface protein (S-layer protein) OS=Clostridium | Q183M8 Q183M8_CLOD6 |
| EDQLVDALAAPIAGR                 | 40    | 805.4  | 2 |                 | Cell surface protein (S-layer protein) OS=Clostridium | Q183M8 Q183M8_CLOD6 |
| SANDTIASQDTPAK                  | 69    | 709.7  | 2 |                 | Cell surface protein (S-layer protein) OS=Clostridium | Q183M8 Q183M8_CLOD6 |
| GIASSVINK                       | 61    | 444.7  | 2 |                 | Cell surface protein (S-layer protein) OS=Clostridium | Q183M8 Q183M8_CLOD6 |

| Sequence                    | Score | m/z    | z | Modification  | Protein_Name                                          | Protein_ID          |
|-----------------------------|-------|--------|---|---------------|-------------------------------------------------------|---------------------|
| EMTTYDADK                   | 38    | 561.2  | 2 |               | Putative exported protein OS=Clostridium difficile (s | Q180L0 Q180L0_CLOD6 |
| GMEGLGFYAAALSGGSYQR         | 56    | 968.3  | 2 |               | Putative exported protein OS=Clostridium difficile (s | Q180L0 Q180L0_CLOD6 |
|                             |       |        |   |               |                                                       |                     |
| TYNVAVSFQK                  | 55    | 578.7  | 2 |               | Putative peptidoglycan-binding/hydrolysing protein C  | Q181X4 Q181X4_CLOD6 |
| KYGLSADGIIGPATWDK           | 41    | 597.8  | 3 |               | Putative peptidoglycan-binding/hydrolysing protein C  | Q181X4 Q181X4_CLOD6 |
| TITIM*SNEYLTISTTK           | 70    | 916.3  | 2 | Oxidation (M) | Putative peptidoglycan-binding/hydrolysing protein C  | Q181X4 Q181X4_CLOD6 |
| GVYASYTVSYNIGAK             | 61    | 796.8  | 2 |               | Putative peptidoglycan-binding/hydrolysing protein C  | Q181X4 Q181X4_CLOD6 |
| TITIMSNEYLTISTTK            | 45    | 908.4  | 2 |               | Putative peptidoglycan-binding/hydrolysing protein C  | Q181X4 Q181X4_CLOD6 |
| YGLSADGIIGPATWDKLGR         | 73    | 663.9  | 3 |               | Putative peptidoglycan-binding/hydrolysing protein C  | Q181X4 Q181X4_CLOD6 |
| TYNVAVSFQKK                 | 56    | 642.7  | 2 |               | Putative peptidoglycan-binding/hydrolysing protein C  | Q181X4 Q181X4_CLOD6 |
| YGLSADGIIGPATWDK            | 81    | 832.3  | 2 |               | Putative peptidoglycan-binding/hydrolysing protein C  | Q181X4 Q181X4_CLOD6 |
|                             |       |        |   |               |                                                       |                     |
| NADYFGGEPK                  | 43    | 549.2  | 2 |               | Oligopeptide ABC transporter, substrate-binding pro   | Q183A6 Q183A6_CLOD6 |
| IIPNEASQEALNNGEISLM*K       | 42    | 753.4  | 3 | Oxidation (M) | Oligopeptide ABC transporter, substrate-binding pro   | Q183A6 Q183A6_CLOD6 |
| IIPNEASQEALNNGEISLMK        | 42    | 748.4  | 3 |               | Oligopeptide ABC transporter, substrate-binding pro   | Q183A6 Q183A6_CLOD6 |
| GM*FETGQYCNQTK              | 34    | 790.3  | 2 | Oxidation (M) | Oligopeptide ABC transporter, substrate-binding pro   | Q183A6 Q183A6_CLOD6 |
| KGESIVFEK                   | 43    | 518.8  | 2 |               | Oligopeptide ABC transporter, substrate-binding pro   | Q183A6 Q183A6_CLOD6 |
| QIQQDISKDAPIYTTIDYEQNLMAAQK | 31    | 1009.1 | 3 |               | Oligopeptide ABC transporter, substrate-binding pro   | Q183A6 Q183A6_CLOD6 |
| NADYFGGEPKADSIALK           | 60    | 599.3  | 3 |               | Oligopeptide ABC transporter, substrate-binding pro   | Q183A6 Q183A6_CLOD6 |
| SNSNLQTYTYSEER              | 61    | 846.3  | 2 |               | Oligopeptide ABC transporter, substrate-binding pro   | Q183A6 Q183A6_CLOD6 |
| HVFEGESNIAKSEK              | 46    | 525.6  | 3 |               | Oligopeptide ABC transporter, substrate-binding pro   | Q183A6 Q183A6_CLOD6 |
| ITLPTASEFLYGISK             | 63    | 863.9  | 2 |               | Oligopeptide ABC transporter, substrate-binding pro   | Q183A6 Q183A6_CLOD6 |
| HVFEGESNIAK                 | 48    | 615.8  | 2 |               | Oligopeptide ABC transporter, substrate-binding pro   | Q183A6 Q183A6_CLOD6 |
| IGIEAIVPYESK                | 44    | 724.4  | 2 |               | Oligopeptide ABC transporter, substrate-binding pro   | Q183A6 Q183A6_CLOD6 |
| GMFETGQYCNQTK               | 45    | 782.3  | 2 |               | Oligopeptide ABC transporter, substrate-binding pro   | Q183A6 Q183A6_CLOD6 |
| NNNPVGSQAFK                 | 55    | 552.7  | 2 |               | Oligopeptide ABC transporter, substrate-binding pro   | Q183A6 Q183A6_CLOD6 |
| SEKNNNPVGSQAFK              | 63    | 724.8  | 2 |               | Oligopeptide ABC transporter, substrate-binding pro   | Q183A6 Q183A6_CLOD6 |
| QALSYALNR                   | 46    | 518.3  | 2 |               | Oligopeptide ABC transporter, substrate-binding pro   | Q183A6 Q183A6_CLOD6 |
| FGHKNYALVAQQELK             | 36    | 582.6  | 3 |               | Oligopeptide ABC transporter, substrate-binding pro   | Q183A6 Q183A6_CLOD6 |
|                             |       |        |   |               |                                                       |                     |
| GAYHGAGIGGGYYTTTK           | 37    | 558.6  | 3 |               | Putative serine-aspartate-rich surface anchored fibri | Q184Y2 Q184Y2_CLOD6 |
| AEIIPADTETSLVVEESK          | 71    | 965.9  | 2 |               | Putative serine-aspartate-rich surface anchored fibri | Q184Y2 Q184Y2_CLOD6 |
|                             |       |        |   |               |                                                       |                     |
| M*VLGFLTDIGGR               | 87    | 647.8  | 2 | Oxidation (M) | Phosphoenolpyruvate-protein phosphotransferase C      | Q183J1 Q183J1_CLOD6 |
| AYKGIGASPGVALGK             | 50    | 694.9  | 2 |               | Phosphoenolpyruvate-protein phosphotransferase C      | Q183J1 Q183J1_CLOD6 |
| AVLEGM*DGKPIVIR             | 41    | 757.4  | 2 | Oxidation (M) | Phosphoenolpyruvate-protein phosphotransferase C      | Q183J1 Q183J1_CLOD6 |
| ALVVEHSELVIEKK              | 48    | 797.5  | 2 |               | Phosphoenolpyruvate-protein phosphotransferase C      | Q183J1 Q183J1_CLOD6 |
|                             |       |        |   |               |                                                       |                     |
| LNNIEAIEK                   | 32    | 522.2  | 2 |               | Proline reductase subunit proprotein OS=Clostridium   | Q17ZY9 Q17ZY9_CLOD6 |
| AGTNM*ERPGPLAAHR            | 33    | 531.9  | 3 | Oxidation (M) | Proline reductase subunit proprotein OS=Clostridium   | Q17ZY9 Q17ZY9_CLOD6 |

| Sequence                      | Score | m/z    | z | Modification  | Protein_Name                                            | Protein_ID          |
|-------------------------------|-------|--------|---|---------------|---------------------------------------------------------|---------------------|
| IVLEENEQSLPM*SK               | 49    | 816.8  | 2 | Oxidation (M) | Proline reductase subunit proprotein OS=Clostridium     | Q17ZY9 Q17ZY9_CLOD6 |
| LNNIEAIEKVTGEK                | 31    | 519.8  | 3 |               | Proline reductase subunit proprotein OS=Clostridium     | Q17ZY9 Q17ZY9_CLOD6 |
| AM*EDEEIDLGVVFGSPQVNAEK       | 43    | 864.6  | 3 | Oxidation (M) | Proline reductase subunit proprotein OS=Clostridium     | Q17ZY9 Q17ZY9_CLOD6 |
| M*LLTTEQQTIPR                 | 39    | 723.8  | 2 | Oxidation (M) | Penicillin-binding protein OS=Clostridium difficile (st | Q189X7 Q189X7_CLOD6 |
| SAADLTLAESALLAGSTKNPSR        | 42    | 725.6  | 3 |               | Penicillin-binding protein OS=Clostridium difficile (st | Q189X7 Q189X7_CLOD6 |
| TADEMWWQIANNLR                | 70    | 781.3  | 2 |               | Putative flagellar basal-body rod protein OS=Clostrid   | Q18D04 Q18D04_CLOD6 |
| SNLAIDGEGFFR                  | 68    | 663.2  | 2 |               | Putative flagellar basal-body rod protein OS=Clostrid   | Q18D04 Q18D04_CLOD6 |
| NYEQGALAPTDSKSNLAIDGEGFFR     | 43    | 900.6  | 3 |               | Putative flagellar basal-body rod protein OS=Clostrid   | Q18D04 Q18D04_CLOD6 |
| NGELFVDNKK                    | 35    | 388.8  | 3 |               | Putative flagellar basal-body rod protein OS=Clostrid   | Q18D04 Q18D04_CLOD6 |
| SNVSLQEEFVDLIATQR             | 46    | 974.9  | 2 |               | Putative flagellar basal-body rod protein OS=Clostrid   | Q18D04 Q18D04_CLOD6 |
| INLYQPIGTQNFISEGDSLFVATDAAQIK | 42    | 1051.7 | 3 |               | Putative flagellar basal-body rod protein OS=Clostrid   | Q18D04 Q18D04_CLOD6 |
| NGGFNVDALGK                   | 50    | 546.7  | 2 |               | Putative flagellar basal-body rod protein OS=Clostrid   | Q18D04 Q18D04_CLOD6 |
| NYEQGALAPTDSK                 | 58    | 697.2  | 2 |               | Putative flagellar basal-body rod protein OS=Clostrid   | Q18D04 Q18D04_CLOD6 |
| VLNSSDNQIVK                   | 39    | 608.8  | 2 |               | Putative collagen-binding protein OS=Clostridium dif    | Q183R6 Q183R6_CLOD6 |
| ISFNLTYPPTSK                  | 43    | 686.3  | 2 |               | Putative collagen-binding protein OS=Clostridium dif    | Q183R6 Q183R6_CLOD6 |
| ISGM*PEISR                    | 41    | 503.3  | 2 | Oxidation (M) | Butyrate kinase OS=Clostridium difficile (strain 630)   | Q18CK3 Q18CK3_CLOD6 |
| IVDVANALDGEGPFSPER            | 65    | 943.4  | 2 |               | Butyrate kinase OS=Clostridium difficile (strain 630)   | Q18CK3 Q18CK3_CLOD6 |
| NAQELFEHAKK                   | 36    | 657.7  | 2 |               | Putative polysaccharide deacetylase OS=Clostridiu       | Q18C42 Q18C42_CLOD6 |
| SLNLDTFVNELNKTDEAM*K          | 38    | 733.3  | 3 | Oxidation (M) | Putative polysaccharide deacetylase OS=Clostridiu       | Q18C42 Q18C42_CLOD6 |
| NM*EPLGNYLK                   | 34    | 597.7  | 2 | Oxidation (M) | Putative polysaccharide deacetylase OS=Clostridiu       | Q18C42 Q18C42_CLOD6 |
| IVFLTFDDGPSTNTNPQVLDILK       | 46    | 845.7  | 3 |               | Putative polysaccharide deacetylase OS=Clostridiu       | Q18C42 Q18C42_CLOD6 |
| IVFLTFDDGPSTNTNPQVLDILKR      | 90    | 897.7  | 3 |               | Putative polysaccharide deacetylase OS=Clostridiu       | Q18C42 Q18C42_CLOD6 |
| GTFFIKGDSLER                  | 48    | 685.3  | 2 |               | Putative polysaccharide deacetylase OS=Clostridiu       | Q18C42 Q18C42_CLOD6 |
| SLNLDTFVNELNK                 | 73    | 753.8  | 2 |               | Putative polysaccharide deacetylase OS=Clostridiu       | Q18C42 Q18C42_CLOD6 |
| NAQELFEHAK                    | 56    | 593.7  | 2 |               | Putative polysaccharide deacetylase OS=Clostridiu       | Q18C42 Q18C42_CLOD6 |
| SLNLDTFVNELNKTDEAMK           | 34    | 727.9  | 3 |               | Putative polysaccharide deacetylase OS=Clostridiu       | Q18C42 Q18C42_CLOD6 |
| NM*ASIDWNALNADAEGK            | 109   | 918.3  | 2 | Oxidation (M) | Putative polysaccharide deacetylase OS=Clostridiu       | Q18C42 Q18C42_CLOD6 |
| QETVNALDQIITYFKDNGYQFK        | 59    | 879.3  | 3 |               | Putative polysaccharide deacetylase OS=Clostridiu       | Q18C42 Q18C42_CLOD6 |
| EAVKEYGYDAK                   | 42    | 636.7  | 2 |               | Putative polysaccharide deacetylase OS=Clostridiu       | Q18C42 Q18C42_CLOD6 |
| VM*SEANTLVK                   | 58    | 554.2  | 2 | Oxidation (M) | Putative lipoprotein OS=Clostridium difficile (strain 6 | Q188Y7 Q188Y7_CLOD6 |
| ALDTSKVM*SEANTLVK             | 34    | 574.9  | 3 | Oxidation (M) | Putative lipoprotein OS=Clostridium difficile (strain 6 | Q188Y7 Q188Y7_CLOD6 |
| LSEM*LGKEVFAADDNVVGENAK       | 58    | 818.0  | 3 | Oxidation (M) | Phosphoglycerate kinase OS=Clostridium difficile (s     | Q181T8 PGK_CLOD6    |
| EVVFAADDNVVGENAK              | 76    | 838.8  | 2 |               | Phosphoglycerate kinase OS=Clostridium difficile (s     | Q181T8 PGK_CLOD6    |



| Sequence                       | Score | m/z    | z | Modification    | Protein_Name                                          | Protein_ID          |
|--------------------------------|-------|--------|---|-----------------|-------------------------------------------------------|---------------------|
| ELASLAEIFVNDAFGTAHR            | 50    | 688.0  | 3 |                 | Phosphoglycerate kinase OS=Clostridium difficile (s   | Q181T8 PGK_CLOD6    |
| FLGEAVANPVRPFTAILGGAK          | 60    | 710.0  | 3 |                 | Phosphoglycerate kinase OS=Clostridium difficile (s   | Q181T8 PGK_CLOD6    |
| AM*AELTDATTVIGGGDSAAAVNQLGFGDK | 36    | 933.0  | 3 | Oxidation (M)   | Phosphoglycerate kinase OS=Clostridium difficile (s   | Q181T8 PGK_CLOD6    |
| LTEELINEGYAR                   | 47    | 704.2  | 2 |                 | Isoleucyl-tRNA synthetase OS=Clostridium difficile (  | Q182V2 Q182V2_CLOD6 |
| M*NLFVGLGSK                    | 41    | 548.2  | 2 | Oxidation (M)   | Isoleucyl-tRNA synthetase OS=Clostridium difficile (  | Q182V2 Q182V2_CLOD6 |
| SVTVETFGIDYSVDEKN              | 77    | 951.8  | 2 |                 | Peptidyl-prolyl cis-trans isomerase OS=Clostridium c  | Q18D70 Q18D70_CLOD6 |
| TDSADKPQTPQVM*K                | 33    | 521.2  | 3 | Oxidation (M)   | Peptidyl-prolyl cis-trans isomerase OS=Clostridium c  | Q18D70 Q18D70_CLOD6 |
| VIEGM*DTVDEIASVR               | 75    | 825.3  | 2 | Oxidation (M)   | Peptidyl-prolyl cis-trans isomerase OS=Clostridium c  | Q18D70 Q18D70_CLOD6 |
| NSDAIEIK                       | 53    | 445.2  | 2 |                 | Putative oxidative stress protein OS=Clostridium diff | Q18A21 Q18A21_CLOD6 |
| VANFLNVSLEELKTFAR              | 79    | 976.1  | 2 |                 | Putative oxidative stress protein OS=Clostridium diff | Q18A21 Q18A21_CLOD6 |
| AIAM*GADAVAIASSALM*AAACQQYR    | 50    | 848.5  | 3 | 2 Oxidation (M) | Putative oxidative stress protein OS=Clostridium diff | Q18A21 Q18A21_CLOD6 |
| VTEEIAKVR                      | 63    | 522.8  | 2 |                 | Putative oxidative stress protein OS=Clostridium diff | Q18A21 Q18A21_CLOD6 |
| DATSIPTIFALYR                  | 33    | 734.5  | 2 |                 | Putative oxidative stress protein OS=Clostridium diff | Q18A21 Q18A21_CLOD6 |
| LVDELREVSEGRPIGVK              | 31    | 632.7  | 3 |                 | Putative oxidative stress protein OS=Clostridium diff | Q18A21 Q18A21_CLOD6 |
| YIFEYVPNKYSVTEENLK             | 42    | 746.4  | 3 |                 | Putative oxidative stress protein OS=Clostridium diff | Q18A21 Q18A21_CLOD6 |
| LLKDATSIPTIFALYR               | 42    | 911.5  | 2 |                 | Putative oxidative stress protein OS=Clostridium diff | Q18A21 Q18A21_CLOD6 |
| AIAM*GADAVAIASSALMAAACQQYR     | 35    | 843.1  | 3 | Oxidation (M)   | Putative oxidative stress protein OS=Clostridium diff | Q18A21 Q18A21_CLOD6 |
| VANFLNVSLEELK                  | 83    | 738.4  | 2 |                 | Putative oxidative stress protein OS=Clostridium diff | Q18A21 Q18A21_CLOD6 |
| ISGHKDIHDLSDLLYTVNSEISNYTNIQHV | 48    | 1176.2 | 3 |                 | Putative oxidative stress protein OS=Clostridium diff | Q18A21 Q18A21_CLOD6 |
| SIAELFSEGEDIFR                 | 75    | 806.8  | 2 |                 | Shikimate kinase OS=Clostridium difficile (strain 63C | Q187E9 Q187E9_CLOD6 |
| ILEDININSRPLLK                 | 30    | 546.6  | 3 |                 | Shikimate kinase OS=Clostridium difficile (strain 63C | Q187E9 Q187E9_CLOD6 |
| AQAEKGFDEEIVPVVIK              | 50    | 936.5  | 2 |                 | Acetyl-CoA acetyltransferase OS=Clostridium difficil  | Q18AR0 THLA_CLOD6   |
| TGLATLCIGGGM*GTTLIVKR          | 50    | 679.0  | 3 | Oxidation (M)   | Acetyl-CoA acetyltransferase OS=Clostridium difficil  | Q18AR0 THLA_CLOD6   |
| IM*GYGPVPATK                   | 35    | 575.2  | 2 | Oxidation (M)   | Acetyl-CoA acetyltransferase OS=Clostridium difficil  | Q18AR0 THLA_CLOD6   |
| EKAEELGIEPLATIVSYGTAGVDPK      | 72    | 863.4  | 3 |                 | Acetyl-CoA acetyltransferase OS=Clostridium difficil  | Q18AR0 THLA_CLOD6   |
| ALEAANM*TIEDIDLVEANEFAAQSVAVIR | 43    | 1064.5 | 3 | Oxidation (M)   | Acetyl-CoA acetyltransferase OS=Clostridium difficil  | Q18AR0 THLA_CLOD6   |
| TAVGSFGGAFK                    | 41    | 521.2  | 2 |                 | Acetyl-CoA acetyltransferase OS=Clostridium difficil  | Q18AR0 THLA_CLOD6   |
| ANITPDMIDESLLGGVLTAGLGQNIAR    | 61    | 913.8  | 3 |                 | Acetyl-CoA acetyltransferase OS=Clostridium difficil  | Q18AR0 THLA_CLOD6   |
| DGTVTAGNASGINDGAAM*LVVM*AK     | 51    | 766.0  | 3 | 2 Oxidation (M) | Acetyl-CoA acetyltransferase OS=Clostridium difficil  | Q18AR0 THLA_CLOD6   |
| ANITPDM*IDESLLGGVLTAGLGQNIAR   | 57    | 919.5  | 3 | Oxidation (M)   | Acetyl-CoA acetyltransferase OS=Clostridium difficil  | Q18AR0 THLA_CLOD6   |
| M*REVVIAASAAR                  | 31    | 609.8  | 2 | Oxidation (M)   | Acetyl-CoA acetyltransferase OS=Clostridium difficil  | Q18AR0 THLA_CLOD6   |
| SVSAVELGVTAAK                  | 67    | 616.3  | 2 |                 | Acetyl-CoA acetyltransferase OS=Clostridium difficil  | Q18AR0 THLA_CLOD6   |
| QIALGAGIPVEKPAM*TINIVCGSGLR    | 46    | 894.8  | 3 | Oxidation (M)   | Acetyl-CoA acetyltransferase OS=Clostridium difficil  | Q18AR0 THLA_CLOD6   |
| KDGTVTAGNASGINDGAAM*LVVM*AK    | 34    | 808.3  | 3 | 2 Oxidation (M) | Acetyl-CoA acetyltransferase OS=Clostridium difficil  | Q18AR0 THLA_CLOD6   |
| ILTTLLYEM*K                    | 49    | 620.8  | 2 | Oxidation (M)   | Acetyl-CoA acetyltransferase OS=Clostridium difficil  | Q18AR0 THLA_CLOD6   |

| Sequence                    | Score | m/z    | z | Modification  | Protein_Name                                           | Protein_ID          |
|-----------------------------|-------|--------|---|---------------|--------------------------------------------------------|---------------------|
| ITSSDESIIVAK                | 87    | 631.8  | 2 |               | Flagellar cap protein OS=Clostridium difficile (strain | Q18CX9 Q18CX9_CLOD6 |
| AFVDDYNALM*DKVYGLVTTK       | 75    | 1140.0 | 2 | Oxidation (M) | Flagellar cap protein OS=Clostridium difficile (strain | Q18CX9 Q18CX9_CLOD6 |
| NLEADVTDDQGRVTHISK          | 57    | 666.9  | 3 |               | Flagellar cap protein OS=Clostridium difficile (strain | Q18CX9 Q18CX9_CLOD6 |
| LVSVDTEEATK                 | 72    | 646.8  | 2 |               | Flagellar cap protein OS=Clostridium difficile (strain | Q18CX9 Q18CX9_CLOD6 |
| IVFEYSGSSASK                | 68    | 637.8  | 2 |               | Flagellar cap protein OS=Clostridium difficile (strain | Q18CX9 Q18CX9_CLOD6 |
| ASYSEM*TGELIISR             | 63    | 786.9  | 2 | Oxidation (M) | Flagellar cap protein OS=Clostridium difficile (strain | Q18CX9 Q18CX9_CLOD6 |
| KLGISEHENYK                 | 41    | 716.4  | 2 |               | Flagellar cap protein OS=Clostridium difficile (strain | Q18CX9 Q18CX9_CLOD6 |
| GSAGA EKINYQFAVSQMAEPAK     | 31    | 766.4  | 3 |               | Flagellar cap protein OS=Clostridium difficile (strain | Q18CX9 Q18CX9_CLOD6 |
| KAGM*ENSSSASQNVYSK          | 63    | 902.4  | 2 | Oxidation (M) | Flagellar cap protein OS=Clostridium difficile (strain | Q18CX9 Q18CX9_CLOD6 |
| ALAGYSSNYDDK                | 55    | 652.3  | 2 |               | Flagellar cap protein OS=Clostridium difficile (strain | Q18CX9 Q18CX9_CLOD6 |
| LVSVDTEEATKNM*K             | 58    | 841.4  | 2 | Oxidation (M) | Flagellar cap protein OS=Clostridium difficile (strain | Q18CX9 Q18CX9_CLOD6 |
| VIGNDSLQGIASDNGITFTDASGTK   | 72    | 1327.5 | 2 |               | Flagellar cap protein OS=Clostridium difficile (strain | Q18CX9 Q18CX9_CLOD6 |
| LGISEHENYK                  | 53    | 652.3  | 2 |               | Flagellar cap protein OS=Clostridium difficile (strain | Q18CX9 Q18CX9_CLOD6 |
| AGM*ENSSSASQNVYSK           | 76    | 838.3  | 2 | Oxidation (M) | Flagellar cap protein OS=Clostridium difficile (strain | Q18CX9 Q18CX9_CLOD6 |
| KIVFEYSGSSASK               | 66    | 701.9  | 2 |               | Flagellar cap protein OS=Clostridium difficile (strain | Q18CX9 Q18CX9_CLOD6 |
| ALIDDSKVYK                  | 54    | 633.8  | 2 |               | Flagellar cap protein OS=Clostridium difficile (strain | Q18CX9 Q18CX9_CLOD6 |
| GSAGA EKINYQFAVSQM*AEPK     | 42    | 771.7  | 3 | Oxidation (M) | Flagellar cap protein OS=Clostridium difficile (strain | Q18CX9 Q18CX9_CLOD6 |
| YSSQMNYFSAQGN               | 31    | 812.8  | 2 |               | Flagellar cap protein OS=Clostridium difficile (strain | Q18CX9 Q18CX9_CLOD6 |
| YSALESLLNK                  | 56    | 569.3  | 2 |               | Flagellar cap protein OS=Clostridium difficile (strain | Q18CX9 Q18CX9_CLOD6 |
| AFVEDIQSM*FFGDADTIILRK      | 90    | 835.5  | 3 | Oxidation (M) | Flagellar cap protein OS=Clostridium difficile (strain | Q18CX9 Q18CX9_CLOD6 |
| EGILRNDELRL                 | 36    | 665.3  | 2 |               | Flagellar cap protein OS=Clostridium difficile (strain | Q18CX9 Q18CX9_CLOD6 |
| EQNSFKIDNIDYVNSK            | 40    | 1015.0 | 2 |               | Flagellar cap protein OS=Clostridium difficile (strain | Q18CX9 Q18CX9_CLOD6 |
| INSLCADNIRASYSEM*TGELIISR   | 31    | 949.1  | 3 | Oxidation (M) | Flagellar cap protein OS=Clostridium difficile (strain | Q18CX9 Q18CX9_CLOD6 |
| INSLCADNIR                  | 60    | 645.8  | 2 |               | Flagellar cap protein OS=Clostridium difficile (strain | Q18CX9 Q18CX9_CLOD6 |
| GQISFNADTFK                 | 71    | 657.9  | 2 |               | Flagellar cap protein OS=Clostridium difficile (strain | Q18CX9 Q18CX9_CLOD6 |
| YSSQM*NYFSAQGN              | 42    | 820.8  | 2 | Oxidation (M) | Flagellar cap protein OS=Clostridium difficile (strain | Q18CX9 Q18CX9_CLOD6 |
| INYQFAVSQM*AEPKVTIK         | 48    | 718.7  | 3 | Oxidation (M) | Flagellar cap protein OS=Clostridium difficile (strain | Q18CX9 Q18CX9_CLOD6 |
| ALAGYSSNYDDKGM*FEK          | 55    | 638.3  | 3 | Oxidation (M) | Flagellar cap protein OS=Clostridium difficile (strain | Q18CX9 Q18CX9_CLOD6 |
| ALAGYSSNYDDKGMFEK           | 61    | 948.4  | 2 |               | Flagellar cap protein OS=Clostridium difficile (strain | Q18CX9 Q18CX9_CLOD6 |
| AFVEDIQSM*FFGDADTIILR       | 68    | 792.7  | 3 | Oxidation (M) | Flagellar cap protein OS=Clostridium difficile (strain | Q18CX9 Q18CX9_CLOD6 |
| ITSSDESIIVAKGSAGA EK        | 89    | 931.9  | 2 |               | Flagellar cap protein OS=Clostridium difficile (strain | Q18CX9 Q18CX9_CLOD6 |
| GSAKLVSVDTEEATK             | 67    | 818.4  | 2 |               | Flagellar cap protein OS=Clostridium difficile (strain | Q18CX9 Q18CX9_CLOD6 |
| INYQFAVSQMAEPAK             | 74    | 849.4  | 2 |               | Flagellar cap protein OS=Clostridium difficile (strain | Q18CX9 Q18CX9_CLOD6 |
| AFVDDYNALMDKVYGLVTTK        | 51    | 755.4  | 3 |               | Flagellar cap protein OS=Clostridium difficile (strain | Q18CX9 Q18CX9_CLOD6 |
| QTGSSSIDLKL                 | 56    | 575.8  | 2 |               | Flagellar cap protein OS=Clostridium difficile (strain | Q18CX9 Q18CX9_CLOD6 |
| AGMENSSSASQNVYSK            | 84    | 830.4  | 2 |               | Flagellar cap protein OS=Clostridium difficile (strain | Q18CX9 Q18CX9_CLOD6 |
| NDDELRAFVEDIQSMFFGDADTIILR  | 53    | 1034.9 | 3 |               | Flagellar cap protein OS=Clostridium difficile (strain | Q18CX9 Q18CX9_CLOD6 |
| NDDELRAFVEDIQSM*FFGDADTIILR | 72    | 1040.1 | 3 | Oxidation (M) | Flagellar cap protein OS=Clostridium difficile (strain | Q18CX9 Q18CX9_CLOD6 |
| ASYSEMTGELIISR              | 75    | 778.9  | 2 |               | Flagellar cap protein OS=Clostridium difficile (strain | Q18CX9 Q18CX9_CLOD6 |
| INYQFAVSQMAEPAKVTIK         | 52    | 713.7  | 3 |               | Flagellar cap protein OS=Clostridium difficile (strain | Q18CX9 Q18CX9_CLOD6 |

| Sequence                   | Score | m/z    | z | Modification    | Protein_Name                                           | Protein_ID          |
|----------------------------|-------|--------|---|-----------------|--------------------------------------------------------|---------------------|
| INSLCADNDIRASYSEMTEGELIISR | 59    | 943.7  | 3 |                 | Flagellar cap protein OS=Clostridium difficile (strain | Q18CX9 Q18CX9_CLOD6 |
| LVSVDTEEATKNMK             | 86    | 833.4  | 2 |                 | Flagellar cap protein OS=Clostridium difficile (strain | Q18CX9 Q18CX9_CLOD6 |
| IDNIDYVNSK                 | 79    | 647.8  | 2 |                 | Flagellar cap protein OS=Clostridium difficile (strain | Q18CX9 Q18CX9_CLOD6 |
| INYQFAVSQM*AEPK            | 74    | 856.9  | 2 | Oxidation (M)   | Flagellar cap protein OS=Clostridium difficile (strain | Q18CX9 Q18CX9_CLOD6 |
| VTGLSGNFDM*EGIIASM*IR      | 41    | 725.0  | 3 | 2 Oxidation (M) | Flagellar cap protein OS=Clostridium difficile (strain | Q18CX9 Q18CX9_CLOD6 |
| IDNIDYVNSKGSK              | 43    | 819.4  | 2 |                 | Flagellar cap protein OS=Clostridium difficile (strain | Q18CX9 Q18CX9_CLOD6 |
| NLEADVTDQGR                | 80    | 666.8  | 2 |                 | Flagellar cap protein OS=Clostridium difficile (strain | Q18CX9 Q18CX9_CLOD6 |
| KAGMENSSASQNVYSK           | 72    | 894.4  | 2 |                 | Flagellar cap protein OS=Clostridium difficile (strain | Q18CX9 Q18CX9_CLOD6 |
| IVFEYSGSSASKLTK            | 84    | 808.9  | 2 |                 | Flagellar cap protein OS=Clostridium difficile (strain | Q18CX9 Q18CX9_CLOD6 |
| KGQISFNADTFK               | 85    | 721.9  | 2 |                 | Flagellar cap protein OS=Clostridium difficile (strain | Q18CX9 Q18CX9_CLOD6 |
| QIAEQERNISR                | 32    | 448.6  | 3 |                 | Flagellar cap protein OS=Clostridium difficile (strain | Q18CX9 Q18CX9_CLOD6 |
|                            |       |        |   |                 |                                                        |                     |
| M*GLLLDM*SPR               | 33    | 582.7  | 2 | 2 Oxidation (M) | DNA-directed RNA polymerase subunit beta' OS=Ci        | Q18CF3 RPOC_CLOD6   |
| VEELFEAR                   | 41    | 496.7  | 2 |                 | DNA-directed RNA polymerase subunit beta' OS=Ci        | Q18CF3 RPOC_CLOD6   |
| FATSDLNDLYR                | 31    | 657.7  | 2 |                 | DNA-directed RNA polymerase subunit beta' OS=Ci        | Q18CF3 RPOC_CLOD6   |
| TLLQNIDLEQQSK              | 36    | 765.3  | 2 |                 | DNA-directed RNA polymerase subunit beta' OS=Ci        | Q18CF3 RPOC_CLOD6   |
| LVDVSDVIVR                 | 67    | 621.7  | 2 |                 | DNA-directed RNA polymerase subunit beta' OS=Ci        | Q18CF3 RPOC_CLOD6   |
| LLELGAPDIIVR               | 39    | 654.8  | 2 |                 | DNA-directed RNA polymerase subunit beta' OS=Ci        | Q18CF3 RPOC_CLOD6   |
| LGIQAFEPILVEGK             | 34    | 757.4  | 2 |                 | DNA-directed RNA polymerase subunit beta' OS=Ci        | Q18CF3 RPOC_CLOD6   |
| FLM*LSVNNILAPK             | 35    | 738.3  | 2 | Oxidation (M)   | DNA-directed RNA polymerase subunit beta' OS=Ci        | Q18CF3 RPOC_CLOD6   |
| M*LQEAVDALIDNGRR           | 32    | 572.9  | 3 | Oxidation (M)   | DNA-directed RNA polymerase subunit beta' OS=Ci        | Q18CF3 RPOC_CLOD6   |
| QQQM*LEAGDPLTQGFINPHDIVR   | 38    | 851.3  | 3 | Oxidation (M)   | DNA-directed RNA polymerase subunit beta' OS=Ci        | Q18CF3 RPOC_CLOD6   |
|                            |       |        |   |                 |                                                        |                     |
| TLGYFAQLAK                 | 54    | 556.3  | 2 |                 | Glyceraldehyde-3-phosphate dehydrogenase 2 OS=         | Q181T9 Q181T9_CLOD6 |
| VVSWYDNEMSYTSQLIR          | 72    | 1046.0 | 2 |                 | Glyceraldehyde-3-phosphate dehydrogenase 2 OS=         | Q181T9 Q181T9_CLOD6 |
| AIGLVIPSLK                 | 50    | 505.8  | 2 |                 | Glyceraldehyde-3-phosphate dehydrogenase 2 OS=         | Q181T9 Q181T9_CLOD6 |
| VVSWYDNEM*SYTSQLIR         | 70    | 1054.5 | 2 | Oxidation (M)   | Glyceraldehyde-3-phosphate dehydrogenase 2 OS=         | Q181T9 Q181T9_CLOD6 |
| M*M*EQQDKFEVVAINDLTDK      | 65    | 786.7  | 3 | 2 Oxidation (M) | Glyceraldehyde-3-phosphate dehydrogenase 2 OS=         | Q181T9 Q181T9_CLOD6 |
| VAINGFGR                   | 33    | 417.2  | 2 |                 | Glyceraldehyde-3-phosphate dehydrogenase 2 OS=         | Q181T9 Q181T9_CLOD6 |
| AIGLVIPSLKKGK              | 31    | 598.4  | 2 |                 | Glyceraldehyde-3-phosphate dehydrogenase 2 OS=         | Q181T9 Q181T9_CLOD6 |
| VM*EVDGKQLVK               | 48    | 631.4  | 2 | Oxidation (M)   | Glyceraldehyde-3-phosphate dehydrogenase 2 OS=         | Q181T9 Q181T9_CLOD6 |
| VPVVTGSITELVCTLGK          | 93    | 887.0  | 2 |                 | Glyceraldehyde-3-phosphate dehydrogenase 2 OS=         | Q181T9 Q181T9_CLOD6 |
| VLNDKYGIEK                 | 41    | 589.9  | 2 |                 | Glyceraldehyde-3-phosphate dehydrogenase 2 OS=         | Q181T9 Q181T9_CLOD6 |
| ARAAAGNIVPNTTGAAK          | 38    | 792.0  | 2 |                 | Glyceraldehyde-3-phosphate dehydrogenase 2 OS=         | Q181T9 Q181T9_CLOD6 |
| VVISAPATGDLK               | 34    | 585.9  | 2 |                 | Glyceraldehyde-3-phosphate dehydrogenase 2 OS=         | Q181T9 Q181T9_CLOD6 |
| GLM*TTIHAYTNDQNTLDGPHPK    | 52    | 814.0  | 3 | Oxidation (M)   | Glyceraldehyde-3-phosphate dehydrogenase 2 OS=         | Q181T9 Q181T9_CLOD6 |
| KVVISAPATGDLK              | 58    | 649.9  | 2 |                 | Glyceraldehyde-3-phosphate dehydrogenase 2 OS=         | Q181T9 Q181T9_CLOD6 |
|                            |       |        |   |                 |                                                        |                     |
| NIVVGANKTEYHIK             | 33    | 793.4  | 2 |                 | Prolyl-tRNA synthetase 1 OS=Clostridium difficile (s   | Q18CD2 SYP1_CLOD6   |
| GVEVGHIFK                  | 44    | 493.3  | 2 |                 | Prolyl-tRNA synthetase 1 OS=Clostridium difficile (s   | Q18CD2 SYP1_CLOD6   |

| Sequence                         | Score | m/z    | z | Modification  | Protein_Name                                            | Protein_ID          |
|----------------------------------|-------|--------|---|---------------|---------------------------------------------------------|---------------------|
| EIPADAEITSHQLM*VR                | 42    | 913.5  | 2 | Oxidation (M) | Prolyl-tRNA synthetase 1 OS=Clostridium difficile (s    | Q18CD2 SYP1_CLOD6   |
| VQGEVEVDNEQKEK                   | 57    | 865.3  | 2 |               | Cell surface protein OS=Clostridium difficile (strain 6 | Q183N2 Q183N2_CLOD6 |
| SEALEYLLNNIR                     | 72    | 717.8  | 2 |               | Cell surface protein OS=Clostridium difficile (strain 6 | Q183N2 Q183N2_CLOD6 |
| TVDYENISSDEGLIFTLINSEVVKPIGGTGSS | 36    | 1167.8 | 3 |               | Cell surface protein OS=Clostridium difficile (strain 6 | Q183N2 Q183N2_CLOD6 |
| SIQTISHNISNLDTDGYSR              | 60    | 1061.4 | 2 |               | Putative flagellar hook-associated protein OS=Clostr    | Q18CW5 Q18CW5_CLOD6 |
| QINDVYNSSAGITVR                  | 69    | 819.3  | 2 |               | Putative flagellar hook-associated protein OS=Clostr    | Q18CW5 Q18CW5_CLOD6 |
| NSFYDYQFR                        | 33    | 620.3  | 2 |               | Putative flagellar hook-associated protein OS=Clostr    | Q18CW5 Q18CW5_CLOD6 |
| KIINNVDNSR                       | 56    | 586.8  | 2 |               | Putative flagellar hook-associated protein OS=Clostr    | Q18CW5 Q18CW5_CLOD6 |
| DFFITSNVAGEDIIK                  | 85    | 834.8  | 2 |               | Putative flagellar hook-associated protein OS=Clostr    | Q18CW5 Q18CW5_CLOD6 |
| AFAESVGLDSQK                     | 63    | 626.3  | 2 |               | Putative flagellar hook-associated protein OS=Clostr    | Q18CW5 Q18CW5_CLOD6 |
| GQLGTGVHVTDVTR                   | 88    | 720.3  | 2 |               | Putative flagellar hook-associated protein OS=Clostr    | Q18CW5 Q18CW5_CLOD6 |
| VSTISDHYK                        | 40    | 525.2  | 2 |               | Putative flagellar hook-associated protein OS=Clostr    | Q18CW5 Q18CW5_CLOD6 |
| SLVVENASNATLISESYKK              | 49    | 722.7  | 3 |               | Putative flagellar hook-associated protein OS=Clostr    | Q18CW5 Q18CW5_CLOD6 |
| SLVVENASNATLISESYK               | 116   | 1019.4 | 2 |               | Putative flagellar hook-associated protein OS=Clostr    | Q18CW5 Q18CW5_CLOD6 |
| IDIGVAGGK                        | 35    | 415.2  | 2 |               | Putative flagellar hook-associated protein OS=Clostr    | Q18CW5 Q18CW5_CLOD6 |
| MSVSGVSLDEEMTELM*K               | 36    | 951.4  | 2 | Oxidation (M) | Putative flagellar hook-associated protein OS=Clostr    | Q18CW5 Q18CW5_CLOD6 |
| SIDIISGSGSTPNDLLDERDR            | 91    | 754.0  | 3 |               | Putative flagellar hook-associated protein OS=Clostr    | Q18CW5 Q18CW5_CLOD6 |
| SNSNELKLTTEEASK                  | 62    | 825.9  | 2 |               | Putative flagellar hook-associated protein OS=Clostr    | Q18CW5 Q18CW5_CLOD6 |
| SDLKDVSDGLAK                     | 42    | 624.3  | 2 |               | Putative flagellar hook-associated protein OS=Clostr    | Q18CW5 Q18CW5_CLOD6 |
| AFAESVGLDSQKVNQDEVNQR            | 98    | 778.9  | 3 |               | Putative flagellar hook-associated protein OS=Clostr    | Q18CW5 Q18CW5_CLOD6 |
| AGLFSILNTANSGMNAHQK              | 68    | 659.0  | 3 |               | Putative flagellar hook-associated protein OS=Clostr    | Q18CW5 Q18CW5_CLOD6 |
| IINNVDNSR                        | 40    | 522.8  | 2 |               | Putative flagellar hook-associated protein OS=Clostr    | Q18CW5 Q18CW5_CLOD6 |
| AGLFSILNTANSGM*NAHQK             | 49    | 664.0  | 3 | Oxidation (M) | Putative flagellar hook-associated protein OS=Clostr    | Q18CW5 Q18CW5_CLOD6 |
| TGISGTLQGLFEM*HGK                | 48    | 564.5  | 3 | Oxidation (M) | Putative flagellar hook-associated protein OS=Clostr    | Q18CW5 Q18CW5_CLOD6 |
| TVYIIGSESTISKNVENQLLSK           | 59    | 808.4  | 3 |               | Cell surface protein OS=Clostridium difficile (strain 6 | Q183N5 Q183N5_CLOD6 |
| GLQLTDALAASTIAK                  | 79    | 737.0  | 2 |               | Cell surface protein OS=Clostridium difficile (strain 6 | Q183N5 Q183N5_CLOD6 |
| NSKEFYLSK                        | 37    | 558.3  | 2 |               | Cell surface protein OS=Clostridium difficile (strain 6 | Q183N5 Q183N5_CLOD6 |
| TVYIIGSESTISK                    | 86    | 699.4  | 2 |               | Cell surface protein OS=Clostridium difficile (strain 6 | Q183N5 Q183N5_CLOD6 |
| NAPVVLVENSNGK                    | 73    | 670.8  | 2 |               | Cell surface protein OS=Clostridium difficile (strain 6 | Q183N5 Q183N5_CLOD6 |
| SYALGSSEIISDELVK                 | 94    | 855.9  | 2 |               | Cell surface protein OS=Clostridium difficile (strain 6 | Q183N5 Q183N5_CLOD6 |
| SYALGSSEIISDELVKSTNSIR           | 32    | 790.7  | 3 |               | Cell surface protein OS=Clostridium difficile (strain 6 | Q183N5 Q183N5_CLOD6 |
| YLDWSEIKPGYIAVQGENIIK            | 45    | 813.2  | 3 |               | Cell surface protein OS=Clostridium difficile (strain 6 | Q183N5 Q183N5_CLOD6 |
| DADDIGNFIFNEWK                   | 80    | 842.3  | 2 |               | Cell surface protein OS=Clostridium difficile (strain 6 | Q183N5 Q183N5_CLOD6 |
| DGVPIILTDGNSVGFDTTGLK            | 93    | 1060.0 | 2 |               | Cell surface protein OS=Clostridium difficile (strain 6 | Q183N5 Q183N5_CLOD6 |
| KYNVDANLIK                       | 42    | 589.3  | 2 |               | Putative transglycosylase OS=Clostridium difficile (s   | Q18CX0 Q18CX0_CLOD6 |
| GVESISDLYK                       | 52    | 555.7  | 2 |               | Putative transglycosylase OS=Clostridium difficile (s   | Q18CX0 Q18CX0_CLOD6 |

| Sequence                  | Score | m/z    | z | Modification  | Protein_Name                                            | Protein_ID          |
|---------------------------|-------|--------|---|---------------|---------------------------------------------------------|---------------------|
| SRGVESISDLYK              | 34    | 677.3  | 2 |               | Putative transglycosylase OS=Clostridium difficile (s   | Q18CX0 Q18CX0_CLOD6 |
| FIEVDTKDK                 | 37    | 365.5  | 3 |               | Putative transglycosylase OS=Clostridium difficile (s   | Q18CX0 Q18CX0_CLOD6 |
| AIKVESDFNPNTVSSAGAK       | 55    | 1024.4 | 2 |               | Putative transglycosylase OS=Clostridium difficile (s   | Q18CX0 Q18CX0_CLOD6 |
| YNVDANLIK                 | 45    | 525.2  | 2 |               | Putative transglycosylase OS=Clostridium difficile (s   | Q18CX0 Q18CX0_CLOD6 |
| VESDFNPNTVSSAGAK          | 53    | 811.8  | 2 |               | Putative transglycosylase OS=Clostridium difficile (s   | Q18CX0 Q18CX0_CLOD6 |
| DLGVTNPFNIEQNIDAGTR       | 68    | 1037.8 | 2 |               | Putative transglycosylase OS=Clostridium difficile (s   | Q18CX0 Q18CX0_CLOD6 |
| LFNELDSVANNTVGK           | 58    | 810.8  | 2 |               | Putative transglycosylase OS=Clostridium difficile (s   | Q18CX0 Q18CX0_CLOD6 |
| SRIENAVEQASK              | 32    | 666.3  | 2 |               | Putative transglycosylase OS=Clostridium difficile (s   | Q18CX0 Q18CX0_CLOD6 |
|                           |       |        |   |               |                                                         |                     |
| VLFAVDELTLGLIGAAAIMRPSK   | 40    | 758.0  | 3 |               | Putative uncharacterized protein OS=Clostridium dif     | Q189C2 Q189C2_CLOD6 |
| VLFAVDELTLGLIGAAIM*RPSK   | 60    | 763.7  | 3 | Oxidation (M) | Putative uncharacterized protein OS=Clostridium dif     | Q189C2 Q189C2_CLOD6 |
|                           |       |        |   |               |                                                         |                     |
| LVGPAGEVEMKEGVIVASR       | 42    | 647.6  | 3 |               | Putative propanediol utilization protein OS=Clostridiu  | Q183B8 Q183B8_CLOD6 |
| APIKESGDIAGTPGVK          | 60    | 770.3  | 2 |               | Putative propanediol utilization protein OS=Clostridiu  | Q183B8 Q183B8_CLOD6 |
| LVGPAGEVEM*KEGVIVASR      | 59    | 978.9  | 2 | Oxidation (M) | Putative propanediol utilization protein OS=Clostridiu  | Q183B8 Q183B8_CLOD6 |
| ALVFENLVLR                | 47    | 580.2  | 2 |               | Putative propanediol utilization protein OS=Clostridiu  | Q183B8 Q183B8_CLOD6 |
|                           |       |        |   |               |                                                         |                     |
| AFTNAQFETR                | 36    | 592.7  | 2 |               | Subunit of oxygen-sensitive 2-hydroxyisocaproyl-Co      | Q1881 Q1881_CLOD6   |
| VVINDLLAEQYANAFK          | 87    | 904.4  | 2 |               | Subunit of oxygen-sensitive 2-hydroxyisocaproyl-Co      | Q1881 Q1881_CLOD6   |
| IQGLVEVM*EER              | 44    | 659.8  | 2 | Oxidation (M) | Subunit of oxygen-sensitive 2-hydroxyisocaproyl-Co      | Q1881 Q1881_CLOD6   |
|                           |       |        |   |               |                                                         |                     |
| ENVNTLLR                  | 32    | 479.8  | 2 |               | Cell surface protein OS=Clostridium difficile (strain 6 | Q183K2 Q183K2_CLOD6 |
| QGLIDYVVPQLYWPIGLK        | 35    | 701.7  | 3 |               | Cell surface protein OS=Clostridium difficile (strain 6 | Q183K2 Q183K2_CLOD6 |
| LKSPVVM*LGNSVTSQAK        | 92    | 888.0  | 2 | Oxidation (M) | Cell surface protein OS=Clostridium difficile (strain 6 | Q183K2 Q183K2_CLOD6 |
| SVGINTAVVQVRPK            | 90    | 734.5  | 2 |               | Cell surface protein OS=Clostridium difficile (strain 6 | Q183K2 Q183K2_CLOD6 |
| SIKPNVVFVGVSPAGIWR        | 48    | 609.7  | 3 |               | Cell surface protein OS=Clostridium difficile (strain 6 | Q183K2 Q183K2_CLOD6 |
| SNQLVDALTSGLAAK           | 72    | 792.8  | 2 |               | Cell surface protein OS=Clostridium difficile (strain 6 | Q183K2 Q183K2_CLOD6 |
| NKSSDPTGSDTSGNESYVGTYADTR | 55    | 870.6  | 3 |               | Cell surface protein OS=Clostridium difficile (strain 6 | Q183K2 Q183K2_CLOD6 |
| DIANSTSIQKDLK             | 41    | 716.9  | 2 |               | Cell surface protein OS=Clostridium difficile (strain 6 | Q183K2 Q183K2_CLOD6 |
| LYITSGTGEADSLSIASK        | 123   | 906.9  | 2 |               | Cell surface protein OS=Clostridium difficile (strain 6 | Q183K2 Q183K2_CLOD6 |
| QQQSSYGGQNIK              | 31    | 669.3  | 2 |               | Cell surface protein OS=Clostridium difficile (strain 6 | Q183K2 Q183K2_CLOD6 |
| SLYSSSEEPVTPPSNVK         | 35    | 910.8  | 2 |               | Cell surface protein OS=Clostridium difficile (strain 6 | Q183K2 Q183K2_CLOD6 |
| DAYFIGGNLSISDSVINKLDK     | 33    | 757.3  | 3 |               | Cell surface protein OS=Clostridium difficile (strain 6 | Q183K2 Q183K2_CLOD6 |
| DNVSDEVYNWISDLK           | 38    | 898.8  | 2 |               | Cell surface protein OS=Clostridium difficile (strain 6 | Q183K2 Q183K2_CLOD6 |
| TNPVEKLYITSGTGEADSLSIASK  | 66    | 827.7  | 3 |               | Cell surface protein OS=Clostridium difficile (strain 6 | Q183K2 Q183K2_CLOD6 |
| DIANSTSIQK                | 47    | 538.8  | 2 |               | Cell surface protein OS=Clostridium difficile (strain 6 | Q183K2 Q183K2_CLOD6 |
| ITM*ADESIDKLPANHPAK       | 52    | 656.2  | 3 | Oxidation (M) | Cell surface protein OS=Clostridium difficile (strain 6 | Q183K2 Q183K2_CLOD6 |
| SLYSSSEEPVTPPSNVKVEK      | 70    | 726.3  | 3 |               | Cell surface protein OS=Clostridium difficile (strain 6 | Q183K2 Q183K2_CLOD6 |
| AAWISTVYNLDWPK            | 69    | 832.9  | 2 |               | Cell surface protein OS=Clostridium difficile (strain 6 | Q183K2 Q183K2_CLOD6 |
| SSDPTGSDTSGNESYVGTYADTR   | 60    | 789.9  | 3 |               | Cell surface protein OS=Clostridium difficile (strain 6 | Q183K2 Q183K2_CLOD6 |

| Sequence                     | Score | m/z    | z | Modification  | Protein_Name                                            | Protein_ID          |
|------------------------------|-------|--------|---|---------------|---------------------------------------------------------|---------------------|
| SPVVM*LGNSVTSQAQK            | 61    | 767.4  | 2 | Oxidation (M) | Cell surface protein OS=Clostridium difficile (strain 6 | Q183K2 Q183K2_CLOD6 |
| VGGSDRYSTSLM*IAK             | 33    | 534.1  | 3 | Oxidation (M) | Cell surface protein OS=Clostridium difficile (strain 6 | Q183K2 Q183K2_CLOD6 |
| TTLVYEAGDGINQNTLNTFLNLVK     | 36    | 880.0  | 3 |               | Cell surface protein OS=Clostridium difficile (strain 6 | Q183K2 Q183K2_CLOD6 |
| QQQSSYGGQNIKEIVQQVTLNR       | 37    | 840.4  | 3 |               | Cell surface protein OS=Clostridium difficile (strain 6 | Q183K2 Q183K2_CLOD6 |
| FYPNAEYSSM*FVSK              | 54    | 843.2  | 2 | Oxidation (M) | Cell surface protein OS=Clostridium difficile (strain 6 | Q183K2 Q183K2_CLOD6 |
| EIVQQVTLNR                   | 56    | 600.4  | 2 |               | Cell surface protein OS=Clostridium difficile (strain 6 | Q183K2 Q183K2_CLOD6 |
| SSDPTGSDTSGNESYVGTYADTRAWIK  | 82    | 956.0  | 3 |               | Cell surface protein OS=Clostridium difficile (strain 6 | Q183K2 Q183K2_CLOD6 |
| KTTLVYEAGDGINQNTLNTFLNLVK    | 69    | 923.0  | 3 |               | Cell surface protein OS=Clostridium difficile (strain 6 | Q183K2 Q183K2_CLOD6 |
| GTNVDLYIGGGIYK               | 58    | 770.9  | 2 |               | Cell surface protein OS=Clostridium difficile (strain 6 | Q183K2 Q183K2_CLOD6 |
|                              |       |        |   |               |                                                         |                     |
| VKDGETEGYVK                  | 39    | 612.8  | 2 |               | Putative cell wall hydrolase OS=Clostridium difficile   | Q18CS3 Q18CS3_CLOD6 |
| YVDISEGVGYTNADK              | 65    | 815.8  | 2 |               | Putative cell wall hydrolase OS=Clostridium difficile   | Q18CS3 Q18CS3_CLOD6 |
| DKSESSEVIEELEK               | 88    | 811.3  | 2 |               | Putative cell wall hydrolase OS=Clostridium difficile   | Q18CS3 Q18CS3_CLOD6 |
| VKVEDGEGWLATR                | 71    | 730.3  | 2 |               | Putative cell wall hydrolase OS=Clostridium difficile   | Q18CS3 Q18CS3_CLOD6 |
| GSSLLVLEDNGDWLK              | 50    | 823.4  | 2 |               | Putative cell wall hydrolase OS=Clostridium difficile   | Q18CS3 Q18CS3_CLOD6 |
| VEDGEGWLATR                  | 61    | 616.8  | 2 |               | Putative cell wall hydrolase OS=Clostridium difficile   | Q18CS3 Q18CS3_CLOD6 |
| IREEGQVQNIAYSGDEFTVLGTQGEWVK | 55    | 1052.1 | 3 |               | Putative cell wall hydrolase OS=Clostridium difficile   | Q18CS3 Q18CS3_CLOD6 |
| TVSVTSINSSYYTAR              | 76    | 824.9  | 2 |               | Putative cell wall hydrolase OS=Clostridium difficile   | Q18CS3 Q18CS3_CLOD6 |
| YVDISEGVGYTNADKVNLR          | 43    | 704.9  | 3 |               | Putative cell wall hydrolase OS=Clostridium difficile   | Q18CS3 Q18CS3_CLOD6 |
| NAVGNIPR                     | 52    | 484.9  | 2 |               | Putative cell wall hydrolase OS=Clostridium difficile   | Q18CS3 Q18CS3_CLOD6 |
|                              |       |        |   |               |                                                         |                     |
| GVVVEAELGVLAGTEDDVTSDVHK     | 106   | 813.6  | 3 |               | Putative fructose-bisphosphate aldolase OS=Clostrid     | Q188J1 Q188J1_CLOD6 |
| AASDEIGVDVALHLDHGPNM*DAIK    | 42    | 835.3  | 3 | Oxidation (M) | Putative fructose-bisphosphate aldolase OS=Clostrid     | Q188J1 Q188J1_CLOD6 |
| DAIQAVVESKIDDLVLSANSIN       | 79    | 1129.9 | 2 |               | Putative fructose-bisphosphate aldolase OS=Clostrid     | Q188J1 Q188J1_CLOD6 |
| TGVDSLAIAGTSHGAFK            | 80    | 582.2  | 3 |               | Putative fructose-bisphosphate aldolase OS=Clostrid     | Q188J1 Q188J1_CLOD6 |
| IDDLVLSANSIN                 | 63    | 609.2  | 2 |               | Putative fructose-bisphosphate aldolase OS=Clostrid     | Q188J1 Q188J1_CLOD6 |
| DAIQAVVESK                   | 47    | 530.2  | 2 |               | Putative fructose-bisphosphate aldolase OS=Clostrid     | Q188J1 Q188J1_CLOD6 |
| AYEGGFAIGAFNIDLEQLQGVLK      | 62    | 848.0  | 3 |               | Putative fructose-bisphosphate aldolase OS=Clostrid     | Q188J1 Q188J1_CLOD6 |
| LRFDILEEIQSK                 | 58    | 745.8  | 2 |               | Putative fructose-bisphosphate aldolase OS=Clostrid     | Q188J1 Q188J1_CLOD6 |
| LAM*TAAIR                    | 32    | 431.7  | 2 | Oxidation (M) | Putative fructose-bisphosphate aldolase OS=Clostrid     | Q188J1 Q188J1_CLOD6 |
| YTQPAEAVEFVER                | 87    | 769.8  | 2 |               | Putative fructose-bisphosphate aldolase OS=Clostrid     | Q188J1 Q188J1_CLOD6 |
| INM*DTDLR                    | 38    | 497.2  | 2 | Oxidation (M) | Putative fructose-bisphosphate aldolase OS=Clostrid     | Q188J1 Q188J1_CLOD6 |
|                              |       |        |   |               |                                                         |                     |
| TM*GTQIGIGIEDTVK             | 64    | 789.9  | 2 | Oxidation (M) | Cell surface protein OS=Clostridium difficile (strain 6 | Q183L9 Q183L9_CLOD6 |
| TAETVYQIGDGM*KDSVINSIASSLSK  | 45    | 911.2  | 3 | Oxidation (M) | Cell surface protein OS=Clostridium difficile (strain 6 | Q183L9 Q183L9_CLOD6 |
| VLNKEDLESM*GLNLK             | 68    | 859.8  | 2 | Oxidation (M) | Cell surface protein OS=Clostridium difficile (strain 6 | Q183L9 Q183L9_CLOD6 |
| LNPSDVIIGDDGSVSQKAVSQIK      | 72    | 828.4  | 3 |               | Cell surface protein OS=Clostridium difficile (strain 6 | Q183L9 Q183L9_CLOD6 |
| TMGTQIGIGIEDTVK              | 72    | 782.0  | 2 |               | Cell surface protein OS=Clostridium difficile (strain 6 | Q183L9 Q183L9_CLOD6 |
| KYTLNTALATTEYLR              | 113   | 879.5  | 2 |               | Cell surface protein OS=Clostridium difficile (strain 6 | Q183L9 Q183L9_CLOD6 |
| LAGATRFETAVEISK              | 81    | 796.9  | 2 |               | Cell surface protein OS=Clostridium difficile (strain 6 | Q183L9 Q183L9_CLOD6 |

| Sequence                   | Score | m/z   | z | Modification  | Protein_Name                                            | Protein_ID          |
|----------------------------|-------|-------|---|---------------|---------------------------------------------------------|---------------------|
| LNPSDVIIGDDGSVSQK          | 78    | 929.0 | 2 |               | Cell surface protein OS=Clostridium difficile (strain 6 | Q183L9 Q183L9_CLOD6 |
| LKAPILITPK                 | 32    | 547.4 | 2 |               | Cell surface protein OS=Clostridium difficile (strain 6 | Q183L9 Q183L9_CLOD6 |
| AVSQIKSAVNVNVTR            | 33    | 793.5 | 2 |               | Cell surface protein OS=Clostridium difficile (strain 6 | Q183L9 Q183L9_CLOD6 |
| GINVVM*TR                  | 32    | 453.2 | 2 | Oxidation (M) | Cell surface protein OS=Clostridium difficile (strain 6 | Q183L9 Q183L9_CLOD6 |
| VKTM*GTQIGIGIEDTVK         | 79    | 903.5 | 2 | Oxidation (M) | Cell surface protein OS=Clostridium difficile (strain 6 | Q183L9 Q183L9_CLOD6 |
| TLDNGKDYLVLRL              | 74    | 785.5 | 2 |               | Cell surface protein OS=Clostridium difficile (strain 6 | Q183L9 Q183L9_CLOD6 |
| DSVINSIASSLSK              | 58    | 660.9 | 2 |               | Cell surface protein OS=Clostridium difficile (strain 6 | Q183L9 Q183L9_CLOD6 |
| SAVNVNVTR                  | 47    | 480.3 | 2 |               | Cell surface protein OS=Clostridium difficile (strain 6 | Q183L9 Q183L9_CLOD6 |
| TFYDPKELSAM*LVAK           | 32    | 865.0 | 2 | Oxidation (M) | Cell surface protein OS=Clostridium difficile (strain 6 | Q183L9 Q183L9_CLOD6 |
| SDIIVDSITAGPLAAK           | 72    | 786.0 | 2 |               | Cell surface protein OS=Clostridium difficile (strain 6 | Q183L9 Q183L9_CLOD6 |
| VLNKEDLESMGLNLK            | 32    | 568.2 | 3 |               | Cell surface protein OS=Clostridium difficile (strain 6 | Q183L9 Q183L9_CLOD6 |
| YTLNTALATTEYLR             | 82    | 815.6 | 2 |               | Cell surface protein OS=Clostridium difficile (strain 6 | Q183L9 Q183L9_CLOD6 |
| TYVSAYHSTNLSEK             | 64    | 800.4 | 2 |               | Cell surface protein OS=Clostridium difficile (strain 6 | Q183L9 Q183L9_CLOD6 |
| IGGVDRHETSLLIK             | 55    | 537.0 | 3 |               | Cell surface protein OS=Clostridium difficile (strain 6 | Q183L9 Q183L9_CLOD6 |
| APILITPK                   | 51    | 426.8 | 2 |               | Cell surface protein OS=Clostridium difficile (strain 6 | Q183L9 Q183L9_CLOD6 |
| VSGADRHETNANVIK            | 44    | 537.6 | 3 |               | Cell surface protein OS=Clostridium difficile (strain 6 | Q183L9 Q183L9_CLOD6 |
| AGEDQQPIILANK              | 53    | 698.9 | 2 |               | Cell surface protein OS=Clostridium difficile (strain 6 | Q183L9 Q183L9_CLOD6 |
| IIDQISK                    | 31    | 408.8 | 2 |               | Cell surface protein OS=Clostridium difficile (strain 6 | Q183L9 Q183L9_CLOD6 |
| RLNPSDVIIGDDGSVSQK         | 57    | 671.8 | 3 |               | Cell surface protein OS=Clostridium difficile (strain 6 | Q183L9 Q183L9_CLOD6 |
| TVVIDPGHGGSDSGATSGLNNGAQEK | 38    | 804.4 | 3 |               | Cell surface protein OS=Clostridium difficile (strain 6 | Q183L9 Q183L9_CLOD6 |
| SKGINVVM*TR                | 48    | 560.8 | 2 | Oxidation (M) | Cell surface protein OS=Clostridium difficile (strain 6 | Q183L9 Q183L9_CLOD6 |
| TAASNILKR                  | 57    | 487.3 | 2 |               | Cell surface protein OS=Clostridium difficile (strain 6 | Q183L9 Q183L9_CLOD6 |
|                            |       |       |   |               |                                                         |                     |
| IAGLDVVKR                  | 34    | 436.3 | 2 |               | Chaperone protein dnaK OS=Clostridium difficile (st     | Q182E8 DNAK_CLOD6   |
| SQIFSTAADNQTAVDIHVLQGER    | 46    | 834.4 | 3 |               | Chaperone protein dnaK OS=Clostridium difficile (st     | Q182E8 DNAK_CLOD6   |
| SMAYDNTTLGR                | 47    | 614.8 | 2 |               | Chaperone protein dnaK OS=Clostridium difficile (st     | Q182E8 DNAK_CLOD6   |
| TTPSVVAFTKDGGER            | 55    | 754.4 | 2 |               | Chaperone protein dnaK OS=Clostridium difficile (st     | Q182E8 DNAK_CLOD6   |
|                            |       |       |   |               |                                                         |                     |
| LISSTVIPNR                 | 37    | 550.2 | 2 |               | DNA-directed RNA polymerase subunit beta OS=Clo         | Q18CF1 RPOB_CLOD6   |
| GETELTAEER                 | 56    | 567.6 | 2 |               | DNA-directed RNA polymerase subunit beta OS=Clo         | Q18CF1 RPOB_CLOD6   |
| STGPYSLVTQQPLGGK           | 38    | 816.8 | 2 |               | DNA-directed RNA polymerase subunit beta OS=Clo         | Q18CF1 RPOB_CLOD6   |
| SVGELLQNQVR                | 42    | 621.8 | 2 |               | DNA-directed RNA polymerase subunit beta OS=Clo         | Q18CF1 RPOB_CLOD6   |
| LGPEEITR                   | 47    | 457.7 | 2 |               | DNA-directed RNA polymerase subunit beta OS=Clo         | Q18CF1 RPOB_CLOD6   |
| EAPIIGTGIEYR               | 41    | 659.8 | 2 |               | DNA-directed RNA polymerase subunit beta OS=Clo         | Q18CF1 RPOB_CLOD6   |
| LSALGPGGLSR                | 30    | 514.2 | 2 |               | DNA-directed RNA polymerase subunit beta OS=Clo         | Q18CF1 RPOB_CLOD6   |
| ISAEDIINPETGEVFK           | 44    | 930.9 | 2 |               | DNA-directed RNA polymerase subunit beta OS=Clo         | Q18CF1 RPOB_CLOD6   |
| IGAEVDSGDILVGK             | 64    | 686.8 | 2 |               | DNA-directed RNA polymerase subunit beta OS=Clo         | Q18CF1 RPOB_CLOD6   |
| INEFGFIESPYR               | 70    | 736.3 | 2 |               | DNA-directed RNA polymerase subunit beta OS=Clo         | Q18CF1 RPOB_CLOD6   |
| VLTDDEDQEIEVR              | 46    | 723.3 | 2 |               | DNA-directed RNA polymerase subunit beta OS=Clo         | Q18CF1 RPOB_CLOD6   |

| Sequence                  | Score | m/z    | z | Modification  | Protein_Name                                         | Protein_ID          |
|---------------------------|-------|--------|---|---------------|------------------------------------------------------|---------------------|
| ILITGSPIGGISEK            | 52    | 692.9  | 2 |               | Putative 2-hydroxyacyl-CoA dehydratase OS=Clostr     | Q186V7 Q186V7_CLOD6 |
| SLGVTITEEDIR              | 40    | 666.8  | 2 |               | Putative 2-hydroxyacyl-CoA dehydratase OS=Clostr     | Q186V7 Q186V7_CLOD6 |
| SNDLLVDEEIEDVYDALTK       | 41    | 770.4  | 3 |               | Putative 2-hydroxyacyl-CoA dehydratase OS=Clostr     | Q186V7 Q186V7_CLOD6 |
| QFDSFNEAR                 | 36    | 557.2  | 2 |               | Putative 2-hydroxyacyl-CoA dehydratase OS=Clostr     | Q186V7 Q186V7_CLOD6 |
|                           |       |        |   |               |                                                      |                     |
| TGDIENVGITAR              | 56    | 623.2  | 2 |               | Alanyl-tRNA synthetase OS=Clostridium difficile (str | Q18BE7 SYA_CLOD6    |
| ILSEGGVAAGVR              | 57    | 564.7  | 2 |               | Alanyl-tRNA synthetase OS=Clostridium difficile (str | Q18BE7 SYA_CLOD6    |
|                           |       |        |   |               |                                                      |                     |
| EVLDSEGRNPTVEVEVLEDGAM*GR | 47    | 863.4  | 3 | Oxidation (M) | Enolase OS=Clostridium difficile (strain 630) GN=en  | Q181T5 ENO_CLOD6    |
| AGYTAVISHR                | 33    | 537.8  | 2 |               | Enolase OS=Clostridium difficile (strain 630) GN=en  | Q181T5 ENO_CLOD6    |
| M*GAEVFHSLKK              | 47    | 632.3  | 2 | Oxidation (M) | Enolase OS=Clostridium difficile (strain 630) GN=en  | Q181T5 ENO_CLOD6    |
| LGANAILGVSM*AVAR          | 59    | 730.0  | 2 | Oxidation (M) | Enolase OS=Clostridium difficile (strain 630) GN=en  | Q181T5 ENO_CLOD6    |
| GNPTVEVEVLEDGAM*GR        | 77    | 944.4  | 2 | Oxidation (M) | Enolase OS=Clostridium difficile (strain 630) GN=en  | Q181T5 ENO_CLOD6    |
| AIVPSGASTGAFAVELR         | 77    | 888.0  | 2 |               | Enolase OS=Clostridium difficile (strain 630) GN=en  | Q181T5 ENO_CLOD6    |
| EVLDSEGRNPTVEVEVLEDGAMGR  | 41    | 857.8  | 3 |               | Enolase OS=Clostridium difficile (strain 630) GN=en  | Q181T5 ENO_CLOD6    |
| VNQIGTITETLDAIEM*AK       | 106   | 982.0  | 2 | Oxidation (M) | Enolase OS=Clostridium difficile (strain 630) GN=en  | Q181T5 ENO_CLOD6    |
| VNQIGTITETLDAIEMAKR       | 32    | 701.8  | 3 |               | Enolase OS=Clostridium difficile (strain 630) GN=en  | Q181T5 ENO_CLOD6    |
| VNQIGTITETLDAIEM*AKR      | 36    | 707.1  | 3 | Oxidation (M) | Enolase OS=Clostridium difficile (strain 630) GN=en  | Q181T5 ENO_CLOD6    |
| RAGYTAVISHR               | 35    | 410.9  | 3 |               | Enolase OS=Clostridium difficile (strain 630) GN=en  | Q181T5 ENO_CLOD6    |
| GIENGVANSILVK             | 44    | 657.4  | 2 |               | Enolase OS=Clostridium difficile (strain 630) GN=en  | Q181T5 ENO_CLOD6    |
| SVIELVYAR                 | 57    | 525.3  | 2 |               | Enolase OS=Clostridium difficile (strain 630) GN=en  | Q181T5 ENO_CLOD6    |
| YNQLLRIEEM*VGEQAR         | 31    | 656.0  | 3 | Oxidation (M) | Enolase OS=Clostridium difficile (strain 630) GN=en  | Q181T5 ENO_CLOD6    |
| VNQIGTITETLDAIEMAK        | 103   | 974.0  | 2 |               | Enolase OS=Clostridium difficile (strain 630) GN=en  | Q181T5 ENO_CLOD6    |
| IEEM*VGEQAR               | 62    | 589.3  | 2 | Oxidation (M) | Enolase OS=Clostridium difficile (strain 630) GN=en  | Q181T5 ENO_CLOD6    |
| LQLVGDDLFTNTERLEK         | 49    | 1046.1 | 2 |               | Enolase OS=Clostridium difficile (strain 630) GN=en  | Q181T5 ENO_CLOD6    |
| AAADEIGLPLFQYLGGVNAK      | 44    | 683.4  | 3 |               | Enolase OS=Clostridium difficile (strain 630) GN=en  | Q181T5 ENO_CLOD6    |
| SGETEDSTIADLAVAVNAGQIK    | 70    | 1095.5 | 2 |               | Enolase OS=Clostridium difficile (strain 630) GN=en  | Q181T5 ENO_CLOD6    |
| EALIVEAITK                | 60    | 664.9  | 2 |               | Enolase OS=Clostridium difficile (strain 630) GN=en  | Q181T5 ENO_CLOD6    |
|                           |       |        |   |               |                                                      |                     |
| AVFTEWLDSR                | 44    | 612.2  | 2 |               | Pyruvate-flavodoxin oxidoreductase OS=Clostridium    | Q183B6 Q183B6_CLOD6 |
| VDVMPANTVK                | 30    | 537.3  | 2 |               | Pyruvate-flavodoxin oxidoreductase OS=Clostridium    | Q183B6 Q183B6_CLOD6 |
| DFILAQVR                  | 34    | 481.1  | 2 |               | Pyruvate-flavodoxin oxidoreductase OS=Clostridium    | Q183B6 Q183B6_CLOD6 |
| EPGSTGEPLYLDVR            | 44    | 766.8  | 2 |               | Pyruvate-flavodoxin oxidoreductase OS=Clostridium    | Q183B6 Q183B6_CLOD6 |
| YAQAYFDYDSK               | 52    | 685.7  | 2 |               | Pyruvate-flavodoxin oxidoreductase OS=Clostridium    | Q183B6 Q183B6_CLOD6 |
| AVFTEWLDSRNDGEASK         | 46    | 642.5  | 3 |               | Pyruvate-flavodoxin oxidoreductase OS=Clostridium    | Q183B6 Q183B6_CLOD6 |
| TVFDNLVSEQPK              | 60    | 688.8  | 2 |               | Pyruvate-flavodoxin oxidoreductase OS=Clostridium    | Q183B6 Q183B6_CLOD6 |
| SGGITM*SHLR               | 40    | 358.9  | 3 | Oxidation (M) | Pyruvate-flavodoxin oxidoreductase OS=Clostridium    | Q183B6 Q183B6_CLOD6 |
| HFLDAM*PSTVER             | 36    | 709.8  | 2 | Oxidation (M) | Pyruvate-flavodoxin oxidoreductase OS=Clostridium    | Q183B6 Q183B6_CLOD6 |
| IVNM*NAAAVDAGINALVK       | 78    | 946.4  | 2 | Oxidation (M) | Pyruvate-flavodoxin oxidoreductase OS=Clostridium    | Q183B6 Q183B6_CLOD6 |
| QSYVYQYDLLK               | 55    | 710.3  | 2 |               | Pyruvate-flavodoxin oxidoreductase OS=Clostridium    | Q183B6 Q183B6_CLOD6 |



| Sequence                    | Score | m/z    | z | Modification    | Protein_Name                                            | Protein_ID          |
|-----------------------------|-------|--------|---|-----------------|---------------------------------------------------------|---------------------|
| NKIVDAM*TELVSM*DICEDAK      | 31    | 771.9  | 3 | 2 Oxidation (M) | Pyruvate-flavodoxin oxidoreductase OS=Clostridium       | Q183B6 Q183B6_CLOD6 |
| DTTPSDIKTVFDNLVSEQPK        | 60    | 1117.4 | 2 |                 | Pyruvate-flavodoxin oxidoreductase OS=Clostridium       | Q183B6 Q183B6_CLOD6 |
| DVFYGGKENAPM*IIGGR          | 64    | 891.8  | 2 | Oxidation (M)   | Pyruvate-flavodoxin oxidoreductase OS=Clostridium       | Q183B6 Q183B6_CLOD6 |
| GTAQNPDIIYFQTR              | 64    | 755.8  | 2 |                 | Pyruvate-flavodoxin oxidoreductase OS=Clostridium       | Q183B6 Q183B6_CLOD6 |
| NDIKFYTVNAVK                | 34    | 471.2  | 3 |                 | Pyruvate-flavodoxin oxidoreductase OS=Clostridium       | Q183B6 Q183B6_CLOD6 |
| NGFTVGIVDDVTNTSLTPSEPIKIASK | 68    | 935.4  | 3 |                 | Pyruvate-flavodoxin oxidoreductase OS=Clostridium       | Q183B6 Q183B6_CLOD6 |
| NGFTVGIVDDVTNTSLTPSEPIK     | 58    | 1202.9 | 2 |                 | Pyruvate-flavodoxin oxidoreductase OS=Clostridium       | Q183B6 Q183B6_CLOD6 |
| VDVM*PANTVK                 | 43    | 545.2  | 2 | Oxidation (M)   | Pyruvate-flavodoxin oxidoreductase OS=Clostridium       | Q183B6 Q183B6_CLOD6 |
| TKEPGSTGEPLYLDVR            | 72    | 881.4  | 2 |                 | Pyruvate-flavodoxin oxidoreductase OS=Clostridium       | Q183B6 Q183B6_CLOD6 |
| ALASQALSIFGDHQDVM*AAR       | 81    | 706.6  | 3 | Oxidation (M)   | Pyruvate-flavodoxin oxidoreductase OS=Clostridium       | Q183B6 Q183B6_CLOD6 |
| INM*IMQSAFFK                | 59    | 673.2  | 2 | Oxidation (M)   | Pyruvate-flavodoxin oxidoreductase OS=Clostridium       | Q183B6 Q183B6_CLOD6 |
| VAGELLPGVFHVSAR             | 54    | 517.8  | 3 |                 | Pyruvate-flavodoxin oxidoreductase OS=Clostridium       | Q183B6 Q183B6_CLOD6 |
| INM*IM*QSAFFK               | 56    | 681.2  | 2 | 2 Oxidation (M) | Pyruvate-flavodoxin oxidoreductase OS=Clostridium       | Q183B6 Q183B6_CLOD6 |
| LGQEIGLGNR                  | 46    | 528.7  | 2 |                 | Pyruvate-flavodoxin oxidoreductase OS=Clostridium       | Q183B6 Q183B6_CLOD6 |
| YYQNIIVGIVEK                | 54    | 663.3  | 2 |                 | Pyruvate-flavodoxin oxidoreductase OS=Clostridium       | Q183B6 Q183B6_CLOD6 |
| YGLGSKDTTPSDIK              | 36    | 741.3  | 2 |                 | Pyruvate-flavodoxin oxidoreductase OS=Clostridium       | Q183B6 Q183B6_CLOD6 |
| QFPEEADGLFAK                | 32    | 676.2  | 2 |                 | Pyruvate-flavodoxin oxidoreductase OS=Clostridium       | Q183B6 Q183B6_CLOD6 |
| YAQAYFDYDSKK                | 45    | 500.2  | 3 |                 | Pyruvate-flavodoxin oxidoreductase OS=Clostridium       | Q183B6 Q183B6_CLOD6 |
| DNALSPNHPVAR                | 43    | 430.9  | 3 |                 | Pyruvate-flavodoxin oxidoreductase OS=Clostridium       | Q183B6 Q183B6_CLOD6 |
| IVNMNYAAVDAGINALVK          | 59    | 938.4  | 2 |                 | Pyruvate-flavodoxin oxidoreductase OS=Clostridium       | Q183B6 Q183B6_CLOD6 |
| FWGLGSDGTVGANK              | 58    | 704.8  | 2 |                 | Pyruvate-flavodoxin oxidoreductase OS=Clostridium       | Q183B6 Q183B6_CLOD6 |
| ALASQALSIFGDHQDVMAAR        | 75    | 701.2  | 3 |                 | Pyruvate-flavodoxin oxidoreductase OS=Clostridium       | Q183B6 Q183B6_CLOD6 |
| VVTQLYGDR                   | 49    | 525.8  | 2 |                 | Pyruvate-flavodoxin oxidoreductase OS=Clostridium       | Q183B6 Q183B6_CLOD6 |
| FGDTPIR                     | 39    | 403.2  | 2 |                 | Pyruvate-flavodoxin oxidoreductase OS=Clostridium       | Q183B6 Q183B6_CLOD6 |
|                             |       |        |   |                 |                                                         |                     |
| SNLGSDAETLMLDSVAR           | 96    | 889.8  | 2 |                 | Putative exported protein OS=Clostridium difficile (st  | Q181S4 Q181S4_CLOD6 |
| DIDGVKTGILDVSSDFTK          | 68    | 955.4  | 2 |                 | Putative exported protein OS=Clostridium difficile (st  | Q181S4 Q181S4_CLOD6 |
| TGILDVSSDFTK                | 50    | 641.7  | 2 |                 | Putative exported protein OS=Clostridium difficile (st  | Q181S4 Q181S4_CLOD6 |
| SNLGSDAETLM*LDSVAR          | 85    | 897.8  | 2 | Oxidation (M)   | Putative exported protein OS=Clostridium difficile (st  | Q181S4 Q181S4_CLOD6 |
|                             |       |        |   |                 |                                                         |                     |
| VSGM*SFTNFLDK               | 72    | 681.3  | 2 | Oxidation (M)   | Cell surface protein (Putative penicillin-binding prote | Q18BY9 Q18BY9_CLOD6 |
| FEVYQDEVNASALTGTDRYETSIK    | 94    | 946.7  | 3 |                 | Cell surface protein (Putative penicillin-binding prote | Q18BY9 Q18BY9_CLOD6 |
| ATLALSDETPGYIVNTK           | 89    | 896.8  | 2 |                 | Cell surface protein (Putative penicillin-binding prote | Q18BY9 Q18BY9_CLOD6 |
| M*PSSLKENSGLYASSNMIK        | 37    | 691.6  | 3 | Oxidation (M)   | Cell surface protein (Putative penicillin-binding prote | Q18BY9 Q18BY9_CLOD6 |
| M*FTTTAVM*K                 | 53    | 531.1  | 2 | 2 Oxidation (M) | Cell surface protein (Putative penicillin-binding prote | Q18BY9 Q18BY9_CLOD6 |
| IMDENNSNAFIEIPGVIGR         | 56    | 697.2  | 3 |                 | Cell surface protein (Putative penicillin-binding prote | Q18BY9 Q18BY9_CLOD6 |
| FEVYQDEVNASALTGTDR          | 64    | 1058.4 | 2 |                 | Cell surface protein (Putative penicillin-binding prote | Q18BY9 Q18BY9_CLOD6 |
| NTILLADNDSYGHDFLFLK         | 74    | 1025.4 | 2 |                 | Cell surface protein (Putative penicillin-binding prote | Q18BY9 Q18BY9_CLOD6 |
| NLNKDNMYSIASISK             | 61    | 849.4  | 2 |                 | Cell surface protein (Putative penicillin-binding prote | Q18BY9 Q18BY9_CLOD6 |
| NGKDYYLVDEK                 | 53    | 672.2  | 2 |                 | Cell surface protein (Putative penicillin-binding prote | Q18BY9 Q18BY9_CLOD6 |

| Sequence                       | Score | m/z    | z | Modification    | Protein_Name                                            | Protein_ID          |
|--------------------------------|-------|--------|---|-----------------|---------------------------------------------------------|---------------------|
| ENSGLYASSNM*IK                 | 48    | 715.2  | 2 | Oxidation (M)   | Cell surface protein (Putative penicillin-binding prote | Q18BY9 Q18BY9_CLOD6 |
| VDVNDNGTLTVSSPYIENGPEDK        | 47    | 822.0  | 3 |                 | Cell surface protein (Putative penicillin-binding prote | Q18BY9 Q18BY9_CLOD6 |
| EKIQTLLSK                      | 38    | 530.3  | 2 |                 | Cell surface protein (Putative penicillin-binding prote | Q18BY9 Q18BY9_CLOD6 |
| IEISGNGGVYSK                   | 52    | 612.3  | 2 |                 | Cell surface protein (Putative penicillin-binding prote | Q18BY9 Q18BY9_CLOD6 |
| IM*DENNSNAFIEIPGVIGR           | 61    | 1053.4 | 2 | Oxidation (M)   | Cell surface protein (Putative penicillin-binding prote | Q18BY9 Q18BY9_CLOD6 |
| YTSQSYM*FGSVK                  | 60    | 707.3  | 2 | Oxidation (M)   | Cell surface protein (Putative penicillin-binding prote | Q18BY9 Q18BY9_CLOD6 |
| AKPGAFSVYCNDGFTLAEILVER        | 32    | 853.0  | 3 |                 | Cell surface protein (Putative penicillin-binding prote | Q18BY9 Q18BY9_CLOD6 |
| MFTTTAVMK                      | 42    | 515.2  | 2 |                 | Cell surface protein (Putative penicillin-binding prote | Q18BY9 Q18BY9_CLOD6 |
| MFTTTAVM*K                     | 48    | 523.2  | 2 | Oxidation (M)   | Cell surface protein (Putative penicillin-binding prote | Q18BY9 Q18BY9_CLOD6 |
| LNLDTPVVK                      | 47    | 499.8  | 2 |                 | Cell surface protein (Putative penicillin-binding prote | Q18BY9 Q18BY9_CLOD6 |
| M*PSSLKENSGLYASSNM*IK          | 34    | 697.2  | 3 | 2 Oxidation (M) | Cell surface protein (Putative penicillin-binding prote | Q18BY9 Q18BY9_CLOD6 |
| DNMYSIASISK                    | 57    | 614.8  | 2 |                 | Cell surface protein (Putative penicillin-binding prote | Q18BY9 Q18BY9_CLOD6 |
| KIEVNLPQNSSFVYDDK              | 49    | 690.0  | 3 |                 | Cell surface protein (Putative penicillin-binding prote | Q18BY9 Q18BY9_CLOD6 |
| M*FTTTAVMK                     | 57    | 523.2  | 2 | Oxidation (M)   | Cell surface protein (Putative penicillin-binding prote | Q18BY9 Q18BY9_CLOD6 |
| VDVNDNGTLTVSSPYIENGPEDKYVYIGQD | 37    | 1153.5 | 3 |                 | Cell surface protein (Putative penicillin-binding prote | Q18BY9 Q18BY9_CLOD6 |
| YGAVSAQYALIDNGK                | 71    | 785.4  | 2 |                 | Cell surface protein (Putative penicillin-binding prote | Q18BY9 Q18BY9_CLOD6 |
| YTSQSYMFGSVK                   | 62    | 699.3  | 2 |                 | Cell surface protein (Putative penicillin-binding prote | Q18BY9 Q18BY9_CLOD6 |
| TPENSFDDSK                     | 51    | 556.2  | 2 |                 | Cell surface protein (Putative penicillin-binding prote | Q18BY9 Q18BY9_CLOD6 |
| M*LLNHSSGLM*GSSFK              | 62    | 547.5  | 3 | 2 Oxidation (M) | Cell surface protein (Putative penicillin-binding prote | Q18BY9 Q18BY9_CLOD6 |
| IGDDIANK                       | 44    | 423.1  | 2 |                 | Cell surface protein (Putative penicillin-binding prote | Q18BY9 Q18BY9_CLOD6 |
| TPENSFDDSKLAK                  | 62    | 475.2  | 3 |                 | Cell surface protein (Putative penicillin-binding prote | Q18BY9 Q18BY9_CLOD6 |
| IDNNISNSVK                     | 91    | 609.8  | 2 |                 | Cell surface protein (Putative penicillin-binding prote | Q18BY9 Q18BY9_CLOD6 |
| VSGM*SFTNFLDKYINNPLNLQNTK      | 53    | 925.7  | 3 | Oxidation (M)   | Cell surface protein (Putative penicillin-binding prote | Q18BY9 Q18BY9_CLOD6 |
| IQTLLSK                        | 35    | 401.7  | 2 |                 | Cell surface protein (Putative penicillin-binding prote | Q18BY9 Q18BY9_CLOD6 |
| YQSSDIELHDYSK                  | 31    | 528.8  | 3 |                 | Cell surface protein (Putative penicillin-binding prote | Q18BY9 Q18BY9_CLOD6 |
| NLNKDNM*YSIASISK               | 59    | 857.4  | 2 | Oxidation (M)   | Cell surface protein (Putative penicillin-binding prote | Q18BY9 Q18BY9_CLOD6 |
| NSNGILSPASVK                   | 52    | 593.8  | 2 |                 | Cell surface protein (Putative penicillin-binding prote | Q18BY9 Q18BY9_CLOD6 |
| MPSSLKENSGLYASSNMIK            | 44    | 1029.4 | 2 |                 | Cell surface protein (Putative penicillin-binding prote | Q18BY9 Q18BY9_CLOD6 |
| GGVIVFLGSPNAR                  | 47    | 643.8  | 2 |                 | Cell surface protein (Putative penicillin-binding prote | Q18BY9 Q18BY9_CLOD6 |
| IDNNISNSVKEAWK                 | 47    | 578.5  | 3 |                 | Cell surface protein (Putative penicillin-binding prote | Q18BY9 Q18BY9_CLOD6 |
| LVDDGKLNLDTPVVK                | 65    | 813.4  | 2 |                 | Cell surface protein (Putative penicillin-binding prote | Q18BY9 Q18BY9_CLOD6 |
| NTILLADNDSYGHDNFLKELQK         | 80    | 850.1  | 3 |                 | Cell surface protein (Putative penicillin-binding prote | Q18BY9 Q18BY9_CLOD6 |
| VSGMSFTNFLDK                   | 66    | 673.4  | 2 |                 | Cell surface protein (Putative penicillin-binding prote | Q18BY9 Q18BY9_CLOD6 |
| IEVNLPQNSSFVYDDKGVVNYSLVTK     | 34    | 1033.1 | 3 |                 | Cell surface protein (Putative penicillin-binding prote | Q18BY9 Q18BY9_CLOD6 |
| DNM*YSIASISK                   | 57    | 622.7  | 2 | Oxidation (M)   | Cell surface protein (Putative penicillin-binding prote | Q18BY9 Q18BY9_CLOD6 |
| NNITYLNM*SSYDDVPGLGQTASLYYVAQK | 55    | 1081.4 | 3 | Oxidation (M)   | Cell surface protein (Putative penicillin-binding prote | Q18BY9 Q18BY9_CLOD6 |
| MPSSLKENSGLYASSNM*IK           | 34    | 691.6  | 3 | Oxidation (M)   | Cell surface protein (Putative penicillin-binding prote | Q18BY9 Q18BY9_CLOD6 |
| IEVNLPQNSSFVYDDK               | 77    | 969.8  | 2 |                 | Cell surface protein (Putative penicillin-binding prote | Q18BY9 Q18BY9_CLOD6 |
| M*LLNHSSGLMGSSFK               | 57    | 812.8  | 2 | Oxidation (M)   | Cell surface protein (Putative penicillin-binding prote | Q18BY9 Q18BY9_CLOD6 |
| MLLNHSSGLMGSSFK                | 56    | 536.9  | 3 |                 | Cell surface protein (Putative penicillin-binding prote | Q18BY9 Q18BY9_CLOD6 |

| Sequence                    | Score | m/z    | z | Modification  | Protein_Name                                            | Protein_ID          |
|-----------------------------|-------|--------|---|---------------|---------------------------------------------------------|---------------------|
| DYYLVDEK                    | 33    | 522.7  | 2 |               | Cell surface protein (Putative penicillin-binding prote | Q18BY9 Q18BY9_CLOD6 |
| MLLNHSSGLM*GSSFK            | 70    | 542.3  | 3 | Oxidation (M) | Cell surface protein (Putative penicillin-binding prote | Q18BY9 Q18BY9_CLOD6 |
| YINNPLNLQNTK                | 66    | 716.3  | 2 |               | Cell surface protein (Putative penicillin-binding prote | Q18BY9 Q18BY9_CLOD6 |
| SFTCELESNGYAK               | 96    | 753.3  | 2 |               | Cell surface protein (Putative penicillin-binding prote | Q18BY9 Q18BY9_CLOD6 |
| ALCEELLAM*PVVAGQK           | 39    | 873.5  | 2 | Oxidation (M) | Prolyl-tRNA synthetase 2 OS=Clostridium difficile (s    | Q18CD7 SYP2_CLOD6   |
| IKEETGATIR                  | 40    | 559.3  | 2 |               | Prolyl-tRNA synthetase 2 OS=Clostridium difficile (s    | Q18CD7 SYP2_CLOD6   |
| VAPIQVVIVPIAAK              | 48    | 709.5  | 2 |               | Prolyl-tRNA synthetase 2 OS=Clostridium difficile (s    | Q18CD7 SYP2_CLOD6   |
| LIGGLIM*THSDNR              | 32    | 721.8  | 2 | Oxidation (M) | Prolyl-tRNA synthetase 2 OS=Clostridium difficile (s    | Q18CD7 SYP2_CLOD6   |
| IAPVVIELGEGR                | 30    | 683.4  | 2 |               | Electron transfer flavoprotein alpha-subunit OS=Clo     | Q188I8 Q188I8_CLOD6 |
| LADKLGGVVGSRR               | 31    | 420.2  | 3 |               | Electron transfer flavoprotein alpha-subunit OS=Clo     | Q188I8 Q188I8_CLOD6 |
| IVNYSSATLK                  | 30    | 548.1  | 2 |               | Probable amino-acid ABC transporter,substrate-bind      | Q185W5 Q185W5_CLOD6 |
| VGVGTGAVANEILK              | 46    | 664.3  | 2 |               | Probable amino-acid ABC transporter,substrate-bind      | Q185W5 Q185W5_CLOD6 |
| GNYQDLEM*GRLDAVVAQDVEALIAIK | 30    | 950.0  | 3 | Oxidation (M) | Probable amino-acid ABC transporter,substrate-bind      | Q185W5 Q185W5_CLOD6 |
| GFEVDFWDEFAK                | 63    | 745.2  | 2 |               | Probable amino-acid ABC transporter,substrate-bind      | Q185W5 Q185W5_CLOD6 |
| SESAVLVNDNSIADALSATPFAK     | 41    | 774.0  | 3 |               | Cell surface protein OS=Clostridium difficile (strain 6 | Q183M7 Q183M7_CLOD6 |
| ISNNSSTIIR                  | 90    | 596.3  | 2 |               | Cell surface protein OS=Clostridium difficile (strain 6 | Q183M7 Q183M7_CLOD6 |
| QLNAENINFER                 | 49    | 674.6  | 2 |               | Cell surface protein OS=Clostridium difficile (strain 6 | Q183M7 Q183M7_CLOD6 |
| TINNSFSIETKK                | 34    | 691.4  | 2 |               | Cell surface protein OS=Clostridium difficile (strain 6 | Q183M7 Q183M7_CLOD6 |
| NGCYVEAVEVNTSTKEVSR         | 54    | 715.0  | 3 |               | Cell surface protein OS=Clostridium difficile (strain 6 | Q183M7 Q183M7_CLOD6 |
| ADANDIIK                    | 31    | 430.1  | 2 |               | Cell surface protein OS=Clostridium difficile (strain 6 | Q183M7 Q183M7_CLOD6 |
| FNNYAEIEGGVK                | 65    | 670.8  | 2 |               | Cell surface protein OS=Clostridium difficile (strain 6 | Q183M7 Q183M7_CLOD6 |
| NKNDLIDSLAVGVLAAK           | 119   | 870.9  | 2 |               | Cell surface protein OS=Clostridium difficile (strain 6 | Q183M7 Q183M7_CLOD6 |
| NSGNIDTVTGK                 | 42    | 553.2  | 2 |               | Cell surface protein OS=Clostridium difficile (strain 6 | Q183M7 Q183M7_CLOD6 |
| LDTTQKDVLNK                 | 47    | 459.3  | 3 |               | Cell surface protein OS=Clostridium difficile (strain 6 | Q183M7 Q183M7_CLOD6 |
| NGCYVEAVEVNTSTK             | 93    | 836.2  | 2 |               | Cell surface protein OS=Clostridium difficile (strain 6 | Q183M7 Q183M7_CLOD6 |
| TINNSFSIETK                 | 42    | 627.2  | 2 |               | Cell surface protein OS=Clostridium difficile (strain 6 | Q183M7 Q183M7_CLOD6 |
| NSSPIVLAGNK                 | 53    | 550.3  | 2 |               | Cell surface protein OS=Clostridium difficile (strain 6 | Q183M7 Q183M7_CLOD6 |
| TVTIELDGR                   | 46    | 502.3  | 2 |               | Cell surface protein OS=Clostridium difficile (strain 6 | Q183M7 Q183M7_CLOD6 |
| AKDAPILLTQSNK               | 46    | 699.9  | 2 |               | Cell surface protein OS=Clostridium difficile (strain 6 | Q183M7 Q183M7_CLOD6 |
| RADANDIIK                   | 34    | 508.2  | 2 |               | Cell surface protein OS=Clostridium difficile (strain 6 | Q183M7 Q183M7_CLOD6 |
| SYVIGGTYISISNSVER           | 85    | 866.4  | 2 |               | Cell surface protein OS=Clostridium difficile (strain 6 | Q183M7 Q183M7_CLOD6 |
| GTPVIAIATQEK                | 45    | 614.3  | 2 |               | Glucosamine--fructose-6-phosphate aminotransfera        | Q18CK9 Q18CK9_CLOD6 |
| TVVSSEHAFYLR                | 85    | 733.4  | 2 |               | Glucosamine--fructose-6-phosphate aminotransfera        | Q18CK9 Q18CK9_CLOD6 |
| DSPLVVGVEGENFIASDIPALLK     | 30    | 1221.1 | 2 |               | Glucosamine--fructose-6-phosphate aminotransfera        | Q18CK9 Q18CK9_CLOD6 |
| LSVLAEDLEKNPIDGNLIGHTR      | 41    | 821.4  | 3 |               | Glucosamine--fructose-6-phosphate aminotransfera        | Q18CK9 Q18CK9_CLOD6 |

| Sequence                     | Score | m/z    | z | Modification    | Protein_Name                                           | Protein_ID          |
|------------------------------|-------|--------|---|-----------------|--------------------------------------------------------|---------------------|
| ILSITNVVGSSIAR               | 60    | 715.4  | 2 |                 | Glucosamine--fructose-6-phosphate aminotransferase     | Q18CK9 Q18CK9_CLOD6 |
| GAYVVAIAQSHNKDVEK            | 72    | 915.0  | 2 |                 | Glucosamine--fructose-6-phosphate aminotransferase     | Q18CK9 Q18CK9_CLOD6 |
| M*NYTTQM*DAAR                | 40    | 667.3  | 2 | 2 Oxidation (M) | Phosphomethylpyrimidine synthase OS=Clostridium        | Q186R0 THIC_CLOD6   |
| VAIDM*KAEAIM*DLSNYGK         | 43    | 667.6  | 3 | 2 Oxidation (M) | Phosphomethylpyrimidine synthase OS=Clostridium        | Q186R0 THIC_CLOD6   |
| NNTTYVDWNAVEGANTAYTLVTKK     | 46    | 891.7  | 3 |                 | Putative exported protein OS=Clostridium difficile (st | Q184N0 Q184N0_CLOD6 |
| ILVAYNHIK                    | 52    | 357.5  | 3 |                 | Putative exported protein OS=Clostridium difficile (st | Q184N0 Q184N0_CLOD6 |
| VGAIVQTVKPEQTQKPAPP GK       | 32    | 725.0  | 3 |                 | Putative exported protein OS=Clostridium difficile (st | Q184N0 Q184N0_CLOD6 |
| HVMYEGVR                     | 41    | 495.7  | 2 |                 | Putative exported protein OS=Clostridium difficile (st | Q184N0 Q184N0_CLOD6 |
| SYVTGTNSVYGP K               | 70    | 686.7  | 2 |                 | Putative exported protein OS=Clostridium difficile (st | Q184N0 Q184N0_CLOD6 |
| SLSHPLPFDKTAYPK              | 45    | 567.6  | 3 |                 | Putative exported protein OS=Clostridium difficile (st | Q184N0 Q184N0_CLOD6 |
| EGVEVNPIDGTELTVLGLVGDTSKIDAK | 47    | 957.5  | 3 |                 | Putative chorismate biosynthesis-related protein [inc  | Q187E1 Q187E1_CLOD6 |
| TIASAVGREI                   | 39    | 508.7  | 2 |                 | Putative chorismate biosynthesis-related protein [inc  | Q187E1 Q187E1_CLOD6 |
| SWM*VDSL SK                  | 37    | 534.7  | 2 | Oxidation (M)   | Putative chorismate biosynthesis-related protein [inc  | Q187E1 Q187E1_CLOD6 |
| NTLDLSAILAVK                 | 80    | 629.4  | 2 |                 | Putative chorismate biosynthesis-related protein [inc  | Q187E1 Q187E1_CLOD6 |
| WIAELLGTEVR                  | 60    | 643.8  | 2 |                 | (R)-2-hydroxyisocaproate dehydrogenase OS=Clost        | Q188H7 Q188H7_CLOD6 |
| AAALDTFETEGFLNKK             | 44    | 623.3  | 3 |                 | (R)-2-hydroxyisocaproate dehydrogenase OS=Clost        | Q188H7 Q188H7_CLOD6 |
| AAALDTFETEGFLN K             | 80    | 870.5  | 2 |                 | (R)-2-hydroxyisocaproate dehydrogenase OS=Clost        | Q188H7 Q188H7_CLOD6 |
| YGIATALAGTQGNYR              | 71    | 778.3  | 2 |                 | Putative basal-body rod modification protein OS=Clo    | Q18CZ5 Q18CZ5_CLOD6 |
| IGEVDENSGEENDSSEQESPEEA      | 41    | 1240.2 | 2 |                 | Putative basal-body rod modification protein OS=Clo    | Q18CZ5 Q18CZ5_CLOD6 |
| SNNLSQLER                    | 61    | 530.7  | 2 |                 | Putative basal-body rod modification protein OS=Clo    | Q18CZ5 Q18CZ5_CLOD6 |
| NINDIANKQVR                  | 49    | 642.8  | 2 |                 | Putative basal-body rod modification protein OS=Clo    | Q18CZ5 Q18CZ5_CLOD6 |
| GPQAANVVRL                   | 60    | 512.7  | 2 |                 | Putative cold shock protein OS=Clostridium difficile   | Q18BL9 Q18BL9_CLOD6 |
| TLEEGQSVEFEVVDGAK            | 80    | 918.8  | 2 |                 | Putative cold shock protein OS=Clostridium difficile   | Q18BL9 Q18BL9_CLOD6 |
| TATAEDANDVISYIR              | 95    | 819.8  | 2 |                 | Triosephosphate isomerase OS=Clostridium difficile     | Q181T6 Q181T6_CLOD6 |
| GAFTGEVSPLM*LK               | 60    | 683.3  | 2 | Oxidation (M)   | Triosephosphate isomerase OS=Clostridium difficile     | Q181T6 Q181T6_CLOD6 |
| GLYGELANEVR                  | 63    | 611.2  | 2 |                 | Triosephosphate isomerase OS=Clostridium difficile     | Q181T6 Q181T6_CLOD6 |
| TATAEDANDVISYIREVIK          | 42    | 703.6  | 3 |                 | Triosephosphate isomerase OS=Clostridium difficile     | Q181T6 Q181T6_CLOD6 |
| IGAQM*HFEEK                  | 43    | 660.2  | 2 | Oxidation (M)   | Triosephosphate isomerase OS=Clostridium difficile     | Q181T6 Q181T6_CLOD6 |
| ALENLKDDLAK                  | 45    | 664.8  | 2 |                 | Triosephosphate isomerase OS=Clostridium difficile     | Q181T6 Q181T6_CLOD6 |
| ALEVGIDPILCVGETLEQR          | 81    | 704.9  | 3 |                 | Triosephosphate isomerase OS=Clostridium difficile     | Q181T6 Q181T6_CLOD6 |
| GAFTGEVSPLMLK                | 65    | 675.2  | 2 |                 | Triosephosphate isomerase OS=Clostridium difficile     | Q181T6 Q181T6_CLOD6 |
| VVVAYEPIWAIGTK               | 64    | 801.9  | 2 |                 | Triosephosphate isomerase OS=Clostridium difficile     | Q181T6 Q181T6_CLOD6 |

| Sequence                      | Score | m/z    | z | Modification    | Protein_Name                                           | Protein_ID          |
|-------------------------------|-------|--------|---|-----------------|--------------------------------------------------------|---------------------|
| YGTYYVNR                      | 33    | 436.6  | 2 |                 | Putative cell wall hydrolase OS=Clostridium difficile  | Q181Y8 Q181Y8_CLOD6 |
| VSYGNQGTGYVSSQYLAEK           | 65    | 997.3  | 2 |                 | Putative cell wall hydrolase OS=Clostridium difficile  | Q181Y8 Q181Y8_CLOD6 |
| TITGNAVNFR                    | 58    | 546.7  | 2 |                 | Putative cell wall hydrolase OS=Clostridium difficile  | Q181Y8 Q181Y8_CLOD6 |
| KVTISNINSSYYSSR               | 114   | 859.8  | 2 |                 | Putative cell wall hydrolase OS=Clostridium difficile  | Q181Y8 Q181Y8_CLOD6 |
| YLGTSVNDSTNENAENSSNDLVK       | 56    | 1235.8 | 2 |                 | Putative cell wall hydrolase OS=Clostridium difficile  | Q181Y8 Q181Y8_CLOD6 |
| KSVGVSIPR                     | 46    | 471.7  | 2 |                 | Putative cell wall hydrolase OS=Clostridium difficile  | Q181Y8 Q181Y8_CLOD6 |
| VTISNINSSYYSSR                | 76    | 795.8  | 2 |                 | Putative cell wall hydrolase OS=Clostridium difficile  | Q181Y8 Q181Y8_CLOD6 |
| SVGVSIPR                      | 39    | 407.6  | 2 |                 | Putative cell wall hydrolase OS=Clostridium difficile  | Q181Y8 Q181Y8_CLOD6 |
|                               |       |        |   |                 |                                                        |                     |
| IDVFDSDEFGK                   | 39    | 636.2  | 2 |                 | Spermidine synthase OS=Clostridium difficile (strain   | Q18A85 SPEE_CLOD6   |
| VLVIGGGDGGTVR                 | 37    | 600.2  | 2 |                 | Spermidine synthase OS=Clostridium difficile (strain   | Q18A85 SPEE_CLOD6   |
|                               |       |        |   |                 |                                                        |                     |
| FYEYDSIEDDVR                  | 71    | 775.8  | 2 |                 | Putative exported protein OS=Clostridium difficile (st | Q183N3 Q183N3_CLOD6 |
| ATLTDVTTVNQEINKLGK            | 31    | 648.9  | 3 |                 | Putative exported protein OS=Clostridium difficile (st | Q183N3 Q183N3_CLOD6 |
| TYIGTTESMDAPTPPNYR            | 33    | 1009.4 | 2 |                 | Putative exported protein OS=Clostridium difficile (st | Q183N3 Q183N3_CLOD6 |
| FDVSDKTINDFEVR                | 59    | 562.3  | 3 |                 | Putative exported protein OS=Clostridium difficile (st | Q183N3 Q183N3_CLOD6 |
| ILNENIASM*AK                  | 68    | 610.2  | 2 | Oxidation (M)   | Putative exported protein OS=Clostridium difficile (st | Q183N3 Q183N3_CLOD6 |
| ILTSTAVGNEK                   | 57    | 566.8  | 2 |                 | Putative exported protein OS=Clostridium difficile (st | Q183N3 Q183N3_CLOD6 |
| ILGYEIIR                      | 43    | 488.8  | 2 |                 | Putative exported protein OS=Clostridium difficile (st | Q183N3 Q183N3_CLOD6 |
| FVSDTMYVPVGAK                 | 37    | 707.3  | 2 |                 | Putative exported protein OS=Clostridium difficile (st | Q183N3 Q183N3_CLOD6 |
| GPIITFDK                      | 38    | 445.7  | 2 |                 | Putative exported protein OS=Clostridium difficile (st | Q183N3 Q183N3_CLOD6 |
| YAEDTPSGGDIK                  | 66    | 626.8  | 2 |                 | Putative exported protein OS=Clostridium difficile (st | Q183N3 Q183N3_CLOD6 |
| VSASFSDGIQSGSLVK              | 93    | 791.4  | 2 |                 | Putative exported protein OS=Clostridium difficile (st | Q183N3 Q183N3_CLOD6 |
| FTDNISPLNNR                   | 67    | 645.8  | 2 |                 | Putative exported protein OS=Clostridium difficile (st | Q183N3 Q183N3_CLOD6 |
| TVGFVDAKGNK                   | 36    | 611.8  | 2 |                 | Putative exported protein OS=Clostridium difficile (st | Q183N3 Q183N3_CLOD6 |
| IEGLKDNTTYEVR                 | 52    | 769.4  | 2 |                 | Putative exported protein OS=Clostridium difficile (st | Q183N3 Q183N3_CLOD6 |
| TGVLNTTDIESDKVTLNVPATAVYQGISK | 55    | 1012.4 | 3 |                 | Putative exported protein OS=Clostridium difficile (st | Q183N3 Q183N3_CLOD6 |
| GNADLNTQVDR                   | 89    | 601.7  | 2 |                 | Putative exported protein OS=Clostridium difficile (st | Q183N3 Q183N3_CLOD6 |
| SYTM*DTFMATPR                 | 49    | 718.8  | 2 | Oxidation (M)   | Putative exported protein OS=Clostridium difficile (st | Q183N3 Q183N3_CLOD6 |
| TENDSHGPLQNPEIDNIKDNDASTTYK   | 31    | 1006.4 | 3 |                 | Putative exported protein OS=Clostridium difficile (st | Q183N3 Q183N3_CLOD6 |
| SYTM*DTFM*ATPR                | 53    | 726.7  | 2 | 2 Oxidation (M) | Putative exported protein OS=Clostridium difficile (st | Q183N3 Q183N3_CLOD6 |
| NTSTTYNPLTNYK                 | 39    | 758.8  | 2 |                 | Putative exported protein OS=Clostridium difficile (st | Q183N3 Q183N3_CLOD6 |
| VVAYDYHLNPTEEFVGTVK           | 62    | 770.9  | 3 |                 | Putative exported protein OS=Clostridium difficile (st | Q183N3 Q183N3_CLOD6 |
| TINDFEVR                      | 38    | 497.2  | 2 |                 | Putative exported protein OS=Clostridium difficile (st | Q183N3 Q183N3_CLOD6 |
| SGEINLNTGK                    | 52    | 516.7  | 2 |                 | Putative exported protein OS=Clostridium difficile (st | Q183N3 Q183N3_CLOD6 |
| SYTMDTFM*ATPR                 | 57    | 718.8  | 2 | Oxidation (M)   | Putative exported protein OS=Clostridium difficile (st | Q183N3 Q183N3_CLOD6 |
| LGEKDSGTNVGTDNIEYTIK          | 56    | 752.0  | 3 |                 | Putative exported protein OS=Clostridium difficile (st | Q183N3 Q183N3_CLOD6 |
| SDGNYLDGENTQVK                | 59    | 798.8  | 2 |                 | Putative exported protein OS=Clostridium difficile (st | Q183N3 Q183N3_CLOD6 |
| TKFTDNISPLNNR                 | 50    | 760.3  | 2 |                 | Putative exported protein OS=Clostridium difficile (st | Q183N3 Q183N3_CLOD6 |
| ATLTDVTTVNQEINK               | 70    | 823.8  | 2 |                 | Putative exported protein OS=Clostridium difficile (st | Q183N3 Q183N3_CLOD6 |

| Sequence                      | Score | m/z    | z | Modification    | Protein_Name                                                       | Protein_ID          |
|-------------------------------|-------|--------|---|-----------------|--------------------------------------------------------------------|---------------------|
| TQDLGNGTVDDNEFNLTKNM*APK      | 53    | 923.7  | 3 | Oxidation (M)   | Putative exported protein OS=Clostridium difficile (strain 630) GN | Q183N3 Q183N3_CLOD6 |
| MTATNHLGTSGMASK               | 59    | 718.3  | 2 |                 | Putative exported protein OS=Clostridium difficile (strain 630) GN | Q183N3 Q183N3_CLOD6 |
| TYIGTTESM*DAPTPPNYR           | 42    | 1017.3 | 2 | Oxidation (M)   | Putative exported protein OS=Clostridium difficile (strain 630) GN | Q183N3 Q183N3_CLOD6 |
| AGDEITVYVGSK                  | 61    | 619.7  | 2 |                 | Putative exported protein OS=Clostridium difficile (strain 630) GN | Q183N3 Q183N3_CLOD6 |
| YAEDTPSGGDIKVR                | 40    | 503.2  | 3 |                 | Putative exported protein OS=Clostridium difficile (strain 630) GN | Q183N3 Q183N3_CLOD6 |
| KILNENIASMAK                  | 66    | 666.4  | 2 |                 | Putative exported protein OS=Clostridium difficile (strain 630) GN | Q183N3 Q183N3_CLOD6 |
| IQVSVCSYSYK                   | 53    | 710.8  | 2 |                 | Putative exported protein OS=Clostridium difficile (strain 630) GN | Q183N3 Q183N3_CLOD6 |
| LAQDLYNDR                     | 71    | 554.3  | 2 |                 | Putative exported protein OS=Clostridium difficile (strain 630) GN | Q183N3 Q183N3_CLOD6 |
| FVSDTM*YVPVGAK                | 49    | 715.2  | 2 | Oxidation (M)   | Putative exported protein OS=Clostridium difficile (strain 630) GN | Q183N3 Q183N3_CLOD6 |
| KIQYVNDGAR                    | 58    | 618.3  | 2 |                 | Putative exported protein OS=Clostridium difficile (strain 630) GN | Q183N3 Q183N3_CLOD6 |
| ALSSSDPINSLPK                 | 71    | 664.8  | 2 |                 | Putative exported protein OS=Clostridium difficile (strain 630) GN | Q183N3 Q183N3_CLOD6 |
| ILNENIASMAK                   | 63    | 602.3  | 2 |                 | Putative exported protein OS=Clostridium difficile (strain 630) GN | Q183N3 Q183N3_CLOD6 |
| SNISELKFYEYDSIEDDVR           | 38    | 775.0  | 3 |                 | Putative exported protein OS=Clostridium difficile (strain 630) GN | Q183N3 Q183N3_CLOD6 |
| AWGVEITPELNSIM*DSK            | 54    | 953.8  | 2 | Oxidation (M)   | Putative exported protein OS=Clostridium difficile (strain 630) GN | Q183N3 Q183N3_CLOD6 |
| NNSDADLSNDTFYAK               | 94    | 837.8  | 2 |                 | Putative exported protein OS=Clostridium difficile (strain 630) GN | Q183N3 Q183N3_CLOD6 |
| VSIQSLNGDWSSGYK               | 57    | 821.4  | 2 |                 | Putative exported protein OS=Clostridium difficile (strain 630) GN | Q183N3 Q183N3_CLOD6 |
| SYTMDTFMATPR                  | 56    | 710.8  | 2 |                 | Putative exported protein OS=Clostridium difficile (strain 630) GN | Q183N3 Q183N3_CLOD6 |
| DIEAYGLYR                     | 52    | 550.2  | 2 |                 | Putative exported protein OS=Clostridium difficile (strain 630) GN | Q183N3 Q183N3_CLOD6 |
| TQDLGNGTVDDNEFNLT             | 65    | 1048.9 | 2 |                 | Putative exported protein OS=Clostridium difficile (strain 630) GN | Q183N3 Q183N3_CLOD6 |
| YNLQGDTPVGQR                  | 59    | 731.8  | 2 |                 | Putative exported protein OS=Clostridium difficile (strain 630) GN | Q183N3 Q183N3_CLOD6 |
| LIYTQYYGESGAYK                | 100   | 828.3  | 2 |                 | Putative exported protein OS=Clostridium difficile (strain 630) GN | Q183N3 Q183N3_CLOD6 |
| GEPYYPGTNVGNSYGYSEK           | 41    | 1041.4 | 2 |                 | Putative exported protein OS=Clostridium difficile (strain 630) GN | Q183N3 Q183N3_CLOD6 |
| ETLPIVGLK                     | 41    | 485.3  | 2 |                 | Putative exported protein OS=Clostridium difficile (strain 630) GN | Q183N3 Q183N3_CLOD6 |
|                               |       |        |   |                 |                                                                    |                     |
| LLENLNEGKIFK                  | 36    | 709.3  | 2 |                 | Rubrerhythrin OS=Clostridium difficile (strain 630) GN             | Q18A24 Q18A24_CLOD6 |
| TEKNLM*AGFAGESEAR             | 52    | 863.8  | 2 | Oxidation (M)   | Rubrerhythrin OS=Clostridium difficile (strain 630) GN             | Q18A24 Q18A24_CLOD6 |
| IAYLFEAVGK                    | 48    | 555.7  | 2 |                 | Rubrerhythrin OS=Clostridium difficile (strain 630) GN             | Q18A24 Q18A24_CLOD6 |
| NLMAGFAGESEAR                 | 78    | 676.7  | 2 |                 | Rubrerhythrin OS=Clostridium difficile (strain 630) GN             | Q18A24 Q18A24_CLOD6 |
| NKYTTYASK                     | 32    | 569.1  | 2 |                 | Rubrerhythrin OS=Clostridium difficile (strain 630) GN             | Q18A24 Q18A24_CLOD6 |
| NLM*AGFAGESEAR                | 84    | 684.6  | 2 | Oxidation (M)   | Rubrerhythrin OS=Clostridium difficile (strain 630) GN             | Q18A24 Q18A24_CLOD6 |
| KEGYNQIAAIFEETANNEK           | 49    | 723.6  | 3 |                 | Rubrerhythrin OS=Clostridium difficile (strain 630) GN             | Q18A24 Q18A24_CLOD6 |
| LLHDGM*PSTEENLK               | 38    | 800.3  | 2 | Oxidation (M)   | Rubrerhythrin OS=Clostridium difficile (strain 630) GN             | Q18A24 Q18A24_CLOD6 |
| EEGFDKIAYLFEAVGK              | 61    | 908.4  | 2 |                 | Rubrerhythrin OS=Clostridium difficile (strain 630) GN             | Q18A24 Q18A24_CLOD6 |
| LLENLNEGK                     | 46    | 515.2  | 2 |                 | Rubrerhythrin OS=Clostridium difficile (strain 630) GN             | Q18A24 Q18A24_CLOD6 |
| EGYNQIAAIFEETANNEKEHAK        | 34    | 835.9  | 3 |                 | Rubrerhythrin OS=Clostridium difficile (strain 630) GN             | Q18A24 Q18A24_CLOD6 |
| LLHDGM*PSTEENLKDAAAGENYEWTD*Y | 50    | 1145.0 | 3 | 2 Oxidation (M) | Rubrerhythrin OS=Clostridium difficile (strain 630) GN             | Q18A24 Q18A24_CLOD6 |
| DAAAGENYEWTD*MYAK             | 73    | 917.7  | 2 |                 | Rubrerhythrin OS=Clostridium difficile (strain 630) GN             | Q18A24 Q18A24_CLOD6 |
| AYFNIKAENY                    | 54    | 616.7  | 2 |                 | Rubrerhythrin OS=Clostridium difficile (strain 630) GN             | Q18A24 Q18A24_CLOD6 |
| TEKNLMAGFAGESEAR              | 62    | 855.8  | 2 |                 | Rubrerhythrin OS=Clostridium difficile (strain 630) GN             | Q18A24 Q18A24_CLOD6 |
| YLKLENLNEGK                   | 44    | 717.3  | 2 |                 | Rubrerhythrin OS=Clostridium difficile (strain 630) GN             | Q18A24 Q18A24_CLOD6 |

| Sequence                  | Score | m/z   | z | Modification  | Protein_Name                                            | Protein_ID          |
|---------------------------|-------|-------|---|---------------|---------------------------------------------------------|---------------------|
| DAAAGENYEWTDYAK           | 60    | 925.8 | 2 | Oxidation (M) | Rubryerythrin OS=Clostridium difficile (strain 630) GN  | Q18A24 Q18A24_CLOD6 |
| ELLSIGNLNK                | 39    | 607.3 | 2 |               | Putative penicillin-binding protein repressor OS=Clo    | Q183K0 Q183K0_CLOD6 |
| TNM*NPNEIISLKGKELLSIGNLNK | 52    | 881.0 | 3 | Oxidation (M) | Putative penicillin-binding protein repressor OS=Clo    | Q183K0 Q183K0_CLOD6 |
| TNM*NPNEIISLKGK           | 59    | 723.7 | 2 | Oxidation (M) | Putative penicillin-binding protein repressor OS=Clo    | Q183K0 Q183K0_CLOD6 |
| VIETYYGK                  | 34    | 486.8 | 2 |               | Cell surface protein (Putative S-layer protein) OS=C    | Q183M5 Q183M5_CLOD6 |
| IYIVGGESAVSNTAK           | 96    | 754.9 | 2 |               | Cell surface protein (Putative S-layer protein) OS=C    | Q183M5 Q183M5_CLOD6 |
| LAGDDRHTTSVAVAK           | 40    | 770.9 | 2 |               | Cell surface protein (Putative S-layer protein) OS=C    | Q183M5 Q183M5_CLOD6 |
| YTGGSQVQPIYEIK            | 36    | 820.4 | 2 |               | Cell surface protein (Putative S-layer protein) OS=C    | Q183M5 Q183M5_CLOD6 |
| GEADAMSIAAK               | 76    | 532.2 | 2 |               | Cell surface protein (Putative S-layer protein) OS=C    | Q183M5 Q183M5_CLOD6 |
| TIYVIGIGDEK               | 41    | 547.7 | 2 |               | Cell surface protein (Putative S-layer protein) OS=C    | Q183M5 Q183M5_CLOD6 |
| NIDVQLAEITIK              | 90    | 736.4 | 2 |               | Cell surface protein (Putative S-layer protein) OS=C    | Q183M5 Q183M5_CLOD6 |
| NSDLNTVSPQDLYDGYRLTVK     | 46    | 800.4 | 3 |               | Cell surface protein (Putative S-layer protein) OS=C    | Q183M5 Q183M5_CLOD6 |
| IYIVGGESAVSNTAKK          | 65    | 818.9 | 2 |               | Cell surface protein (Putative S-layer protein) OS=C    | Q183M5 Q183M5_CLOD6 |
| IITNIDELEK                | 41    | 594.3 | 2 |               | Cell surface protein (Putative S-layer protein) OS=C    | Q183M5 Q183M5_CLOD6 |
| ATELTVESTNEK              | 66    | 661.3 | 2 |               | Cell surface protein (Putative S-layer protein) OS=C    | Q183M5 Q183M5_CLOD6 |
| LVDGLAATPLAQSK            | 44    | 692.3 | 2 |               | Cell surface protein (Putative S-layer protein) OS=C    | Q183M5 Q183M5_CLOD6 |
| KAPILLASDNEIPK            | 44    | 503.6 | 3 |               | Cell surface protein (Putative S-layer protein) OS=C    | Q183M5 Q183M5_CLOD6 |
| NSDLNTVSPQDLYDGYR         | 36    | 978.9 | 2 |               | Cell surface protein (Putative S-layer protein) OS=C    | Q183M5 Q183M5_CLOD6 |
| YENSADLSAEANSITEK         | 73    | 921.4 | 2 |               | Cell surface protein (Putative S-layer protein) OS=C    | Q183M5 Q183M5_CLOD6 |
| GHITNSANEVVAEATEK         | 48    | 590.6 | 3 |               | Cell surface protein (Putative S-layer protein) OS=C    | Q183M5 Q183M5_CLOD6 |
| TDITDSQKNALSK             | 40    | 474.2 | 3 |               | Cell surface protein (Putative S-layer protein) OS=C    | Q183M5 Q183M5_CLOD6 |
| AAELKAPIIVNGWNDLSADAIK    | 40    | 770.5 | 3 |               | Cell surface protein (Putative S-layer protein) OS=C    | Q183M5 Q183M5_CLOD6 |
| VIETYYGKLDK               | 45    | 664.9 | 2 |               | Cell surface protein (Putative S-layer protein) OS=C    | Q183M5 Q183M5_CLOD6 |
| LVNALGENK                 | 32    | 479.2 | 2 |               | Cell surface protein (Putative S-layer protein) OS=C    | Q183M5 Q183M5_CLOD6 |
| QLESVTKNIER               | 38    | 439.6 | 3 |               | Cell surface protein (Putative S-layer protein) OS=C    | Q183M5 Q183M5_CLOD6 |
| ATELTVESTNEKDLK           | 49    | 559.9 | 3 |               | Cell surface protein (Putative S-layer protein) OS=C    | Q183M5 Q183M5_CLOD6 |
| DAFVVGAK                  | 31    | 403.7 | 2 |               | Cell surface protein (Putative S-layer protein) OS=C    | Q183M5 Q183M5_CLOD6 |
| YTDNIVIVNSNK              | 60    | 690.4 | 2 |               | Cell surface protein (Putative S-layer protein) OS=C    | Q183M5 Q183M5_CLOD6 |
| APIIVNGWNDLSADAIK         | 38    | 899.0 | 2 |               | Cell surface protein (Putative S-layer protein) OS=C    | Q183M5 Q183M5_CLOD6 |
| NKDIDEITQVGGYQK           | 63    | 939.9 | 2 |               | Cell surface protein OS=Clostridium difficile (strain 6 | Q181V6 Q181V6_CLOD6 |
| TYEELISAFDGR              | 37    | 700.9 | 2 |               | Cell surface protein OS=Clostridium difficile (strain 6 | Q181V6 Q181V6_CLOD6 |
| TRYETAVEVSK               | 47    | 428.2 | 3 |               | Cell surface protein OS=Clostridium difficile (strain 6 | Q181V6 Q181V6_CLOD6 |
| LGVDNVYIVDSGNSISSKVENI    | 42    | 860.4 | 3 |               | Cell surface protein OS=Clostridium difficile (strain 6 | Q181V6 Q181V6_CLOD6 |
| SIMLDKVPGGK               | 44    | 572.8 | 2 |               | Cell surface protein OS=Clostridium difficile (strain 6 | Q181V6 Q181V6_CLOD6 |
| INNVFVAK                  | 50    | 452.8 | 2 |               | Cell surface protein OS=Clostridium difficile (strain 6 | Q181V6 Q181V6_CLOD6 |
| LANQGFLAK                 | 37    | 481.2 | 2 |               | Valyl-tRNA synthetase OS=Clostridium difficile (stra    | Q180A1 Q180A1_CLOD6 |

| Sequence                    | Score | m/z    | z | Modification    | Protein_Name                                           | Protein_ID          |
|-----------------------------|-------|--------|---|-----------------|--------------------------------------------------------|---------------------|
| FVFM*NIDEDIKNNM*TR          | 36    | 673.2  | 3 | 2 Oxidation (M) | Valyl-tRNA synthetase OS=Clostridium difficile (stra   | Q180A1 Q180A1_CLOD6 |
| FSAVGAGFEGGLEALCR           | 60    | 870.8  | 2 |                 | Tellurium resistance protein OS=Clostridium difficile  | Q186J1 Q186J1_CLOD6 |
| VLNSENDEEILR                | 49    | 716.3  | 2 |                 | Tellurium resistance protein OS=Clostridium difficile  | Q186J1 Q186J1_CLOD6 |
| SACPQTYSFLQNLAK             | 68    | 864.3  | 2 |                 | Putative exported protein OS=Clostridium difficile (st | Q183R7 Q183R7_CLOD6 |
| LTDEKEYAYLK                 | 63    | 686.8  | 2 |                 | Putative exported protein OS=Clostridium difficile (st | Q183R7 Q183R7_CLOD6 |
| TWDDVPGLGGSTVALR            | 56    | 548.8  | 3 |                 | Putative exported protein OS=Clostridium difficile (st | Q183R7 Q183R7_CLOD6 |
| SAQFKQIFAK                  | 43    | 584.2  | 2 |                 | Putative exported protein OS=Clostridium difficile (st | Q183R7 Q183R7_CLOD6 |
| YLNALKQNNLK                 | 40    | 659.8  | 2 |                 | Putative exported protein OS=Clostridium difficile (st | Q183R7 Q183R7_CLOD6 |
| GWEGTGKTWDDVPGLGGSTVALR     | 62    | 1180.5 | 2 |                 | Putative exported protein OS=Clostridium difficile (st | Q183R7 Q183R7_CLOD6 |
| DTLSQIVVFPPTGNYDKNEANAMVNR  | 32    | 933.0  | 3 |                 | Putative exported protein OS=Clostridium difficile (st | Q183R7 Q183R7_CLOD6 |
| LKSACPQTYSFLQNLAK           | 39    | 656.9  | 3 |                 | Putative exported protein OS=Clostridium difficile (st | Q183R7 Q183R7_CLOD6 |
| LANIDGKYLNALK               | 45    | 478.2  | 3 |                 | Putative exported protein OS=Clostridium difficile (st | Q183R7 Q183R7_CLOD6 |
| DTLSQIVVFPPTGNYDKNEANAM*VNR | 56    | 938.3  | 3 | Oxidation (M)   | Putative exported protein OS=Clostridium difficile (st | Q183R7 Q183R7_CLOD6 |
| KLVSEGDDVPAN                | 35    | 622.2  | 2 |                 | Putative NUDIX-family hydrolase OS=Clostridium di      | Q189Y6 Q189Y6_CLOD6 |
| ILGGGLPYESAQR               | 33    | 730.3  | 2 |                 | Putative NUDIX-family hydrolase OS=Clostridium di      | Q189Y6 Q189Y6_CLOD6 |
