# Supplementary material
Source: PubMed Central journal article supplement (PMC4014281)
Supplement: supp_M113.034728_mcp.M113.034728-3.pdf [file supp_M113.034728_mcp.M113.034728-3.pdf]

| <b>Table S2: List of protein identifications in <i>Clostridium difficile</i> exoproteome after SDS-PAGE, tryptic digestion, LC-MS/MS and database search (Mascot)</b> |                     |                     |                        |
|-----------------------------------------------------------------------------------------------------------------------------------------------------------------------|---------------------|---------------------|------------------------|
| <b>Protein Name</b>                                                                                                                                                   | <b>Protein ID</b>   | <b>Coverage (%)</b> | <b>Peptides unique</b> |
| Cell surface protein (S-layer protein) OS=Clostridium difficile (strain 630) GN=slpA                                                                                  | Q183M8 Q183M8_CLOD6 | 80                  | 63                     |
| Flagellin subunit OS=Clostridium difficile (strain 630) GN=flc                                                                                                        | Q18CX7 Q18CX7_CLOD6 | 74                  | 31                     |
| Flagellar hook-associated protein OS=Clostridium difficile (strain 630) GN=flgL                                                                                       | Q18CX5 Q18CX5_CLOD6 | 71                  | 24                     |
| Flagellar cap protein OS=Clostridium difficile (strain 630) GN=flid                                                                                                   | Q18CX9 Q18CX9_CLOD6 | 69                  | 51                     |
| Rubryerythrin OS=Clostridium difficile (strain 630) GN=rbr                                                                                                            | Q18A24 Q18A24_CLOD6 | 67                  | 17                     |
| Putative cell-wall hydrolase OS=Clostridium difficile (strain 630) GN=CD2768                                                                                          | Q183K6 Q183K6_CLOD6 | 61                  | 11                     |
| Acetyl-CoA acetyltransferase OS=Clostridium difficile (strain 630) GN=thlA                                                                                            | Q18AR0 THLA_CLOD6   | 58                  | 14                     |
| Putative flagellar hook-associated protein OS=Clostridium difficile (strain 630) GN=flgK                                                                              | Q18CW5 Q18CW5_CLOD6 | 55                  | 20                     |
| Putative fructose-bisphosphate aldolase OS=Clostridium difficile (strain 630) GN=fba                                                                                  | Q188J1 Q188J1_CLOD6 | 50                  | 11                     |
| Aldehyde-alcohol dehydrogenase [includes: alcohol dehydrogenase and pyruvate-formate-lyase deactivase OS=Clostridium diffi                                            | Q184F6 Q184F6_CLOD6 | 48                  | 33                     |
| Enolase OS=Clostridium difficile (strain 630) GN=eno                                                                                                                  | Q181T5 ENO_CLOD6    | 48                  | 20                     |
| Cell surface protein OS=Clostridium difficile (strain 630) GN=CD2767                                                                                                  | Q183K2 Q183K2_CLOD6 | 48                  | 28                     |
| Putative exported protein OS=Clostridium difficile (strain 630) GN=CD2830                                                                                             | Q183R7 Q183R7_CLOD6 | 47                  | 10                     |
| Elongation factor G OS=Clostridium difficile (strain 630) GN=fusA                                                                                                     | Q18CF4 EFG_CLOD6    | 47                  | 28                     |
| Glyceraldehyde-3-phosphate dehydrogenase 2 OS=Clostridium difficile (strain 630) GN=gapB                                                                              | Q181T9 Q181T9_CLOD6 | 47                  | 14                     |
| ABC transporter, substrate-binding lipoprotein OS=Clostridium difficile (strain 630) GN=CD0873                                                                        | Q18A65 Q18A65_CLOD6 | 45                  | 11                     |
| Cell surface protein (Putative S-layer protein) OS=Clostridium difficile (strain 630) GN=CD2791                                                                       | Q183M5 Q183M5_CLOD6 | 44                  | 25                     |
| Putative transglycosylase OS=Clostridium difficile (strain 630) GN=CD0226                                                                                             | Q18CX0 Q18CX0_CLOD6 | 44                  | 10                     |
| Cell surface protein (Putative penicillin-binding protein) OS=Clostridium difficile (strain 630) GN=CD1469                                                            | Q18BY9 Q18BY9_CLOD6 | 43                  | 54                     |
| Putative polysaccharide deacetylase OS=Clostridium difficile (strain 630) GN=CD1522                                                                                   | Q18C42 Q18C42_CLOD6 | 43                  | 12                     |
| Cell surface protein OS=Clostridium difficile (strain 630) GN=CD2784                                                                                                  | Q183L9 Q183L9_CLOD6 | 42                  | 29                     |
| Putative flagellar basal-body rod protein OS=Clostridium difficile (strain 630) GN=CD0269                                                                             | Q18D04 Q18D04_CLOD6 | 42                  | 8                      |
| Putative cold shock protein OS=Clostridium difficile (strain 630) GN=cspB                                                                                             | Q18BL9 Q18BL9_CLOD6 | 41                  | 2                      |
| Triosephosphate isomerase OS=Clostridium difficile (strain 630) GN=tpi                                                                                                | Q181T6 Q181T6_CLOD6 | 40                  | 9                      |
| Cell surface protein OS=Clostridium difficile (strain 630) GN=CD2193                                                                                                  | Q185Y1 Q185Y1_CLOD6 | 39                  | 18                     |
| Flagellar hook protein OS=Clostridium difficile (strain 630) GN=flgE                                                                                                  | Q18CZ4 Q18CZ4_CLOD6 | 39                  | 10                     |
| Putative exported protein OS=Clostridium difficile (strain 630) GN=CD1156                                                                                             | Q18B20 Q18B20_CLOD6 | 37                  | 16                     |
| Putative cell wall hydrolase OS=Clostridium difficile (strain 630) GN=CD0183                                                                                          | Q18CS3 Q18CS3_CLOD6 | 36                  | 10                     |
| 30S ribosomal protein S8 OS=Clostridium difficile (strain 630) GN=rpsH                                                                                                | Q18CH0 RS8_CLOD6    | 36                  | 6                      |
| Formate acetyltransferase OS=Clostridium difficile (strain 630) GN=plfB                                                                                               | Q189V5 Q189V5_CLOD6 | 35                  | 19                     |
| Oligopeptide ABC transporter, substrate-binding protein OS=Clostridium difficile (strain 630) GN=appA                                                                 | Q183A6 Q183A6_CLOD6 | 34                  | 17                     |
| Putative cell wall hydrolase OS=Clostridium difficile (strain 630) GN=CD1135                                                                                          | Q18AZ7 Q18AZ7_CLOD6 | 33                  | 12                     |
| Cell surface protein (Putative N-acetylmuramoyl-L-alanine amidase) OS=Clostridium difficile (strain 630) GN=CD1035                                                    | Q18AN5 Q18AN5_CLOD6 | 31                  | 19                     |

| Protein Name                                                                                                             | Protein ID          | Coverage | Peptides unique |
|--------------------------------------------------------------------------------------------------------------------------|---------------------|----------|-----------------|
| Putative peptidoglycan-binding/hydrolysing protein OS=Clostridium difficile (strain 630) GN=CD2388                       | Q181X4 Q181X4_CLOD6 | 31       | 8               |
| Rubredoxin oxidoreductase (Desulfoferrodoxin) OS=Clostridium difficile (strain 630) GN=rbo                               | Q18A22 Q18A22_CLOD6 | 30       | 3               |
| Cell surface protein OS=Clostridium difficile (strain 630) GN=cwp66                                                      | Q183M7 Q183M7_CLOD6 | 30       | 17              |
| Pyruvate-flavodoxin oxidoreductase OS=Clostridium difficile (strain 630) GN=nifJ                                         | Q183B6 Q183B6_CLOD6 | 30       | 35              |
| Putative oxidative stress protein OS=Clostridium difficile (strain 630) GN=CD0828                                        | Q18A21 Q18A21_CLOD6 | 29       | 11              |
| Putative membrane protein OS=Clostridium difficile (strain 630) GN=CD2127                                                | Q185R5 Q185R5_CLOD6 | 29       | 6               |
| Cell surface protein OS=Clostridium difficile (strain 630) GN=CD2798                                                     | Q183N5 Q183N5_CLOD6 | 29       | 10              |
| Putative basal-body rod modification protein OS=Clostridium difficile (strain 630) GN=flgD                               | Q18CZ5 Q18CZ5_CLOD6 | 29       | 4               |
| Acd OS=Clostridium difficile (strain 630) GN=acd                                                                         | Q5S4P9 Q5S4P9_CLOD6 | 28       | 15              |
| Putative exported protein OS=Clostridium difficile (strain 630) GN=CD2797                                                | Q183N3 Q183N3_CLOD6 | 28       | 51              |
| Putative multidrug efflux pump, outer membrane protein OS=Clostridium difficile (strain 630) GN=CD2408                   | Q181Z3 Q181Z3_CLOD6 | 27       | 9               |
| Peptidyl-prolyl cis-trans isomerase OS=Clostridium difficile (strain 630) GN=ppiB                                        | Q18D70 Q18D70_CLOD6 | 26       | 3               |
| Proline racemase OS=Clostridium difficile (strain 630) GN=CD3237                                                         | Q17ZY4 PRAC_CLOD6   | 26       | 7               |
| Putative exported protein OS=Clostridium difficile (strain 630) GN=CD3043                                                | Q184N0 Q184N0_CLOD6 | 25       | 6               |
| Cell surface protein OS=Clostridium difficile (strain 630) GN=CD0844                                                     | Q18A40 Q18A40_CLOD6 | 25       | 8               |
| 3-hydroxybutyryl-CoA dehydrogenase OS=Clostridium difficile (strain 630) GN=hbd                                          | Q18AQ7 Q18AQ7_CLOD6 | 25       | 4               |
| Surface surface protein OS=Clostridium difficile (strain 630) GN=CD2794                                                  | Q183N1 Q183N1_CLOD6 | 24       | 14              |
| Putative propanediol utilization protein OS=Clostridium difficile (strain 630) GN=CD2683                                 | Q183B8 Q183B8_CLOD6 | 24       | 4               |
| Putative rubrerythrin OS=Clostridium difficile (strain 630) GN=CD1524                                                    | Q18C45 Q18C45_CLOD6 | 23       | 3               |
| Probable amino-acid ABC transporter,substrate-binding protein OS=Clostridium difficile (strain 630) GN=CD2177            | Q185W5 Q185W5_CLOD6 | 23       | 4               |
| Phosphoglycerate kinase OS=Clostridium difficile (strain 630) GN=pgk                                                     | Q181T8 PGK_CLOD6    | 23       | 5               |
| Cell surface protein (Putative cell surface-associated cysteine protease) OS=Clostridium difficile (strain 630) GN=cwp84 | Q183M1 Q183M1_CLOD6 | 22       | 12              |
| Leucyl-tRNA synthetase OS=Clostridium difficile (strain 630) GN=leuS                                                     | Q182K8 SYL_CLOD6    | 21       | 14              |
| Putative cell wall hydrolase OS=Clostridium difficile (strain 630) GN=CD2402                                             | Q181Y8 Q181Y8_CLOD6 | 21       | 8               |
| Flagellar basal-body rod protein FlgG OS=Clostridium difficile (strain 630) GN=flgG                                      | Q18D05 Q18D05_CLOD6 | 21       | 4               |
| Putative flagellar hook-length control protein OS=Clostridium difficile (strain 630) GN=fliK                             | Q18CZ6 Q18CZ6_CLOD6 | 20       | 9               |
| NAD-specific glutamate dehydrogenase OS=Clostridium difficile (strain 630) GN=gluD                                       | Q18CS0 Q18CS0_CLOD6 | 20       | 6               |
| Phosphate butyryltransferase OS=Clostridium difficile (strain 630) GN=ptb                                                | Q18CK4 Q18CK4_CLOD6 | 20       | 4               |
| Elongation factor Tu OS=Clostridium difficile (strain 630) GN=tuf1                                                       | Q18CE4 EFTU_CLOD6   | 20       | 5               |
| Pyruvate kinase OS=Clostridium difficile (strain 630) GN=pykF                                                            | Q180P2 Q180P2_CLOD6 | 19       | 10              |
| 6-phosphofructokinase OS=Clostridium difficile (strain 630) GN=pfkA                                                      | Q180P4 K6PF_CLOD6   | 19       | 6               |
| Acyl-CoA dehydrogenase, short-chain specific OS=Clostridium difficile (strain 630) GN=acdB                               | Q188I5 Q188I5_CLOD6 | 19       | 4               |
| Proline reductase OS=Clostridium difficile (strain 630) GN=prdB                                                          | Q17ZY6 Q17ZY6_CLOD6 | 18       | 3               |
| Putative exported protein OS=Clostridium difficile (strain 630) GN=CD3669                                                | Q181S4 Q181S4_CLOD6 | 18       | 4               |
| Signal peptidase I OS=Clostridium difficile (strain 630) GN=sip3                                                         | Q18BJ6 Q18BJ6_CLOD6 | 18       | 2               |

| Protein Name                                                                                                                                                                   | Protein ID          | Coverage | Peptides unique |
|--------------------------------------------------------------------------------------------------------------------------------------------------------------------------------|---------------------|----------|-----------------|
| Putative NUDIX-family hydrolase OS=Clostridium difficile (strain 630) GN=CD0790                                                                                                | Q189Y6 Q189Y6_CLOD6 | 18       | 2               |
| Putative chorismate biosynthesis-related protein [includes: phospho-2-dehydro-3-deoxyheptonate aldolase and chorismate mutase] OS=Clostridium difficile (strain 630) GN=CD0790 | Q187E1 Q187E1_CLOD6 | 18       | 4               |
| Glucosamine--fructose-6-phosphate aminotransferase [isomerizing] OS=Clostridium difficile (strain 630) GN=glmS                                                                 | Q18CK9 Q18CK9_CLOD6 | 17       | 6               |
| Putative uncharacterized protein OS=Clostridium difficile (strain 630) GN=CD2790                                                                                               | Q183M6 Q183M6_CLOD6 | 17       | 4               |
| Shikimate kinase OS=Clostridium difficile (strain 630) GN=aroK                                                                                                                 | Q187E9 Q187E9_CLOD6 | 16       | 2               |
| Cell surface protein OS=Clostridium difficile (strain 630) GN=CD2795                                                                                                           | Q183N0 Q183N0_CLOD6 | 16       | 7               |
| Tellurium resistance protein OS=Clostridium difficile (strain 630) GN=CD1635                                                                                                   | Q186J1 Q186J1_CLOD6 | 15       | 2               |
| Cell surface protein OS=Clostridium difficile (strain 630) GN=CD3192                                                                                                           | Q181V6 Q181V6_CLOD6 | 15       | 6               |
| Putative amino acid aminotransferase OS=Clostridium difficile (strain 630) GN=CD3664                                                                                           | Q181R8 Q181R8_CLOD6 | 15       | 3               |
| Putative peptidase OS=Clostridium difficile (strain 630) GN=CD1086                                                                                                             | Q18AU1 Q18AU1_CLOD6 | 14       | 4               |
| Putative 2-hydroxyacyl-CoA dehydratase OS=Clostridium difficile (strain 630) GN=CD1749                                                                                         | Q186V7 Q186V7_CLOD6 | 14       | 4               |
| 50S ribosomal protein L1 OS=Clostridium difficile (strain 630) GN=rplA                                                                                                         | Q18CE9 RL1_CLOD6    | 14       | 2               |
| 60 kDa chaperonin OS=Clostridium difficile (strain 630) GN=groL                                                                                                                | Q18CT5 CH60_CLOD6   | 13       | 4               |
| Putative uncharacterized protein OS=Clostridium difficile (strain 630) GN=CD0577                                                                                               | Q189C2 Q189C2_CLOD6 | 12       | 2               |
| DNA-directed RNA polymerase subunit beta' OS=Clostridium difficile (strain 630) GN=rpoC                                                                                        | Q18CF3 RPOC_CLOD6   | 11       | 10              |
| Prolyl-tRNA synthetase 2 OS=Clostridium difficile (strain 630) GN=proS2                                                                                                        | Q18CD7 SYP2_CLOD6   | 11       | 4               |
| Proline reductase subunit proprotein OS=Clostridium difficile (strain 630) GN=prdA                                                                                             | Q17ZY9 Q17ZY9_CLOD6 | 11       | 5               |
| DNA-directed RNA polymerase subunit beta OS=Clostridium difficile (strain 630) GN=rpoB                                                                                         | Q18CF1 RPOB_CLOD6   | 11       | 11              |
| Glucose-6-phosphate isomerase OS=Clostridium difficile (strain 630) GN=pgi                                                                                                     | Q180C9 G6PI_CLOD6   | 10       | 3               |
| Putative uncharacterized protein OS=Clostridium difficile (strain 630) GN=CD0672                                                                                               | Q189L6 Q189L6_CLOD6 | 10       | 2               |
| Phosphoenolpyruvate-protein phosphotransferase OS=Clostridium difficile (strain 630) GN=ptsI                                                                                   | Q183J1 Q183J1_CLOD6 | 10       | 4               |
| Cell surface protein OS=Clostridium difficile (strain 630) GN=CD2796                                                                                                           | Q183N2 Q183N2_CLOD6 | 10       | 3               |
| Putative exported protein OS=Clostridium difficile (strain 630) GN=CD3366                                                                                                      | Q180L0 Q180L0_CLOD6 | 9        | 2               |
| Cell surface protein OS=Clostridium difficile (strain 630) GN=CD2518                                                                                                           | Q182K4 Q182K4_CLOD6 | 9        | 3               |
| Chaperone protein dnaK OS=Clostridium difficile (strain 630) GN=dnaK                                                                                                           | Q182E8 DNAK_CLOD6   | 9        | 4               |
| Subunit of oxygen-sensitive 2-hydroxyisocaproyl-CoA dehydratase OS=Clostridium difficile (strain 630) GN=hadB                                                                  | Q188I1 Q188I1_CLOD6 | 9        | 3               |
| Phenylalanyl-tRNA synthetase beta chain OS=Clostridium difficile (strain 630) GN=pheT                                                                                          | Q189P6 Q189P6_CLOD6 | 8        | 5               |
| (R)-2-hydroxyisocaproate dehydrogenase OS=Clostridium difficile (strain 630) GN=ldhA                                                                                           | Q188H7 Q188H7_CLOD6 | 8        | 3               |
| Spermidine synthase OS=Clostridium difficile (strain 630) GN=speE                                                                                                              | Q18A85 SPEE_CLOD6   | 8        | 2               |
| Putative lipoprotein OS=Clostridium difficile (strain 630) GN=CD0545                                                                                                           | Q188Y7 Q188Y7_CLOD6 | 8        | 2               |
| Butyrate kinase OS=Clostridium difficile (strain 630) GN=buk                                                                                                                   | Q18CK3 Q18CK3_CLOD6 | 8        | 2               |
| Electron transfer flavoprotein alpha-subunit OS=Clostridium difficile (strain 630) GN=etfA1                                                                                    | Q188I8 Q188I8_CLOD6 | 8        | 2               |
| Putative penicillin-binding protein repressor OS=Clostridium difficile (strain 630) GN=CD2765                                                                                  | Q183K0 Q183K0_CLOD6 | 8        | 3               |
| Glycyl-tRNA synthetase beta subunit OS=Clostridium difficile (strain 630) GN=glyS                                                                                              | Q182B8 SYGB_CLOD6   | 7        | 3               |
| Cell surface protein (Putative hemagglutinin/adhesin) OS=Clostridium difficile (strain 630) GN=CD0514                                                                          | Q188W0 Q188W0_CLOD6 | 7        | 10              |

| <b>Protein Name</b>                                                                                                        | <b>Protein ID</b>   | <b>Coverage</b> | <b>Peptides unique</b> |
|----------------------------------------------------------------------------------------------------------------------------|---------------------|-----------------|------------------------|
| Prolyl-tRNA synthetase 1 OS=Clostridium difficile (strain 630) GN=proS1                                                    | Q18CD2 SYP1_CLOD6   | 7               | 3                      |
| Phosphomethylpyrimidine synthase OS=Clostridium difficile (strain 630) GN=thiC                                             | Q186R0 THIC_CLOD6   | 7               | 2                      |
| Putative O-acetylhomoserine sulfhydrylase OS=Clostridium difficile (strain 630) GN=cysD                                    | Q187D4 Q187D4_CLOD6 | 6               | 2                      |
| Aspartyl-tRNA synthetase OS=Clostridium difficile (strain 630) GN=aspS                                                     | Q183H4 Q183H4_CLOD6 | 6               | 3                      |
| Oligopeptide ABC transporter, substrate-binding lipoprotein OS=Clostridium difficile (strain 630) GN=oppA                  | Q18A51 Q18A51_CLOD6 | 6               | 2                      |
| GMP synthase [glutamine-hydrolyzing] OS=Clostridium difficile (strain 630) GN=guaA                                         | Q18CT8 GUAA_CLOD6   | 5               | 3                      |
| Penicillin-binding protein OS=Clostridium difficile (strain 630) GN=CD0781                                                 | Q189X7 Q189X7_CLOD6 | 4               | 2                      |
| Putative serine-aspartate-rich surface anchored fibrinogen-binding protein OS=Clostridium difficile (strain 630) GN=CD3145 | Q184Y2 Q184Y2_CLOD6 | 3               | 2                      |
| Valyl-tRNA synthetase OS=Clostridium difficile (strain 630) GN=valS                                                        | Q180A1 Q180A1_CLOD6 | 3               | 2                      |
| Alanyl-tRNA synthetase OS=Clostridium difficile (strain 630) GN=alaS                                                       | Q18BE7 SYA_CLOD6    | 3               | 2                      |
| Putative collagen-binding protein OS=Clostridium difficile (strain 630) GN=CD2831                                          | Q183R6 Q183R6_CLOD6 | 2               | 2                      |
| Isoleucyl-tRNA synthetase OS=Clostridium difficile (strain 630) GN=CD2618                                                  | Q182V2 Q182V2_CLOD6 | 2               | 2                      |
